# Supplementary material for: REST–Mediated Recruitment of Polycomb Repressor Complexes in Mammalian Cells
Source: PLoS Genet. 2012 Mar 1;8(3):e1002494. doi: 10.1371/journal.pgen.1002494 (PMC3291536; doi:10.1371/journal.pgen.1002494)
Supplement: Table S1 — Expression profiling in NT2-D1. DNA microarray expression analysis for NT2-D1 cells treated with a control shRNA or a shRNA against REST or RNF2. Supporting material for Figure 1D. (XLS) [file pgen.1002494.s009.xls]

## Sheet: Ark1
Gene Symbol	Gene Title	Representative Public ID	Probe Set ID	REST/Ct	p-value - TTEST	RNF2/Ct	p-value - TTEST
HAND1	heart and neural crest derivatives expressed 1	NM_004821	220138_at	3.02232	0.000149557	40.6997	0.0103947
ISL1	ISL LIM homeobox 1	NM_002202	206104_at	15.9405	0.017782	37.3331	0.0175268
MSX1	msh homeobox 1	NM_002448	205932_s_at	14.0162	0.0097826	35.1777	0.0037619
TBX3	T-box 3	NM_016569	219682_s_at	11.8674	0.00612597	34.6744	0.000307286
LIX1	Lix1 homolog (chicken)	N29837	230865_at	2.53078	0.00332223	32.3565	0.00824627
SPARCL1	SPARC-like 1 (hevin)	NM_004684	200795_at	1.80249	0.00254951	24.2564	5.42746e-06
---	---	BF593636	228642_at	7.73764	9.8039e-08	23.7869	0.00358632
---	---	AA031832	238727_at	1.03345	0.796604	23.6059	0.00934817
MBNL3	muscleblind-like 3 (Drosophila)	NM_018388	219814_at	1.84961	0.00212089	19.8055	0.00652458
DLX2	distal-less homeobox 2	NM_004405	207147_at	13.626	0.0287106	17.7807	0.00678888
TFAP2B	transcription factor AP-2 beta (activating enhancer binding protein 2 beta)	NM_003221	214451_at	1.53398	0.0169475	17.5736	0.00418185
---	---	CA448125	1557051_s_at	8.40892	1.05379e-05	17.51	0.00981919
LIX1	Lix1 homolog (chicken)	AW136983	236163_at	2.2284	0.0121824	16.5944	0.00536561
---	---	AI016316	244885_at	1.17058	0.476415	16.5194	0.00261956
CLIC5	chloride intracellular channel 5	AL049313	213317_at	0.763747	0.0173319	16.3895	0.0148201
GRHL3	grainyhead-like 3 (Drosophila)	AL137763	232116_at	8.54278	3.97711e-05	16.2006	0.00467259
TFAP2A	transcription factor AP-2 alpha (activating enhancer binding protein 2 alpha)	BF343007	204653_at	2.53994	0.000134089	14.5193	0.00136824
EFNA1	ephrin-A1	NM_004428	202023_at	1.50757	0.00266106	13.8589	0.00625742
NEDD9	neural precursor cell expressed, developmentally down-regulated 9	AL136139	202149_at	8.92121	0.00670416	12.6197	0.0108272
NTF3	neurotrophin 3	NM_002527	206706_at	1.5868	3.05053e-07	11.4592	0.0118993
LRRC4C	leucine rich repeat containing 4C	AW118214	232226_at	2.54864	0.000988292	11.2032	0.0122502
SEMA3C	sema domain, immunoglobulin domain (Ig), short basic domain, secreted, (semaphorin) 3C	NM_006379	203789_s_at	9.04173	0.00848966	11.1722	0.00824351
TBX3	T-box 3	N29712	229576_s_at	6.31347	0.0469953	11.1254	0.00345479
CDKN2C	cyclin-dependent kinase inhibitor 2C (p18, inhibits CDK4)	NM_001262	204159_at	1.58713	0.00452856	11.0915	0.00310159
KIAA1462	KIAA1462	AL050154	213316_at	0.78719	0.0520039	11.0313	0.00237011
LOC387763	hypothetical LOC387763	AW276078	227099_s_at	0.407862	1.6083e-05	10.9889	0.000756141
ANXA1	annexin A1	NM_000700	201012_at	77.9903	0.00301994	10.5096	0.0123241
---	---	AA424567	238852_at	8.16785	0.0190247	10.4973	0.0285667
CFC1 /// CFC1B	cripto, FRL-1, cryptic family 1 /// cripto, FRL-1, cryptic family 1B	AF312769	223753_s_at	0.464713	0.00195955	10.4026	0.00216895
FOXF2	forkhead box F2	NM_001452	206377_at	1.26705	0.16471	10.1937	7.34165e-05
COL2A1	collagen, type II, alpha 1	X06268	213492_at	1.33688	0.0189053	9.95876	0.00772131
HAPLN1	hyaluronan and proteoglycan link protein 1	AU144114	230204_at	1.51314	0.00567132	5.48797	0.065332
FAM89A	family with sequence similarity 89, member A	AI130705	226448_at	2.17019	2.9641e-05	9.91806	0.0121334
HOXA13	homeobox A13	BG289306	231786_at	1.13612	0.0844968	2.97395	0.0901034
IGF2 /// INS-IGF2	insulin-like growth factor 2 (somatomedin A) /// INS-IGF2 readthrough transcript	X07868	202409_at	0.964783	0.730073	9.80716	0.010321
KIAA1462	KIAA1462	AL553774	231841_s_at	1.17909	0.235726	9.76939	8.2924e-05
TXNIP	thioredoxin interacting protein	NM_006472	201010_s_at	16.2536	0.00723709	9.67604	0.000285761
LOC400043	hypothetical gene supported by BC009385	AL520272	226582_at	1.94069	0.00290286	9.16388	0.00889369
---	---	AI197932	229498_at	3.2428	3.40131e-05	8.79463	0.004166
DLX5	distal-less homeobox 5	NM_005221	213707_s_at	8.16216	3.74705e-05	8.77628	1.26645e-05
PITX2	paired-like homeodomain 2	NM_000325	207558_s_at	1.16046	0.312324	3.69052	0.0224138
TBX3	T-box 3	AI806338	225544_at	2.85662	4.99064e-05	8.69638	7.89365e-06
LHX8	LIM homeobox 8	BC040321	1569469_a_at	1.65615	0.0108696	8.47533	1.46618e-05
NR2F2	nuclear receptor subfamily 2, group F, member 2	AL037401	209120_at	1.49203	0.0377971	8.43458	0.0136029
SOX9	SRY (sex determining region Y)-box 9	AI382146	202935_s_at	8.03203	0.0536818	8.29304	5.61168e-06
PITX1	paired-like homeodomain 1	NM_002653	208502_s_at	1.44392	0.0121469	8.23902	0.0450066
MEIS1	Meis homeobox 1	NM_002398	204069_at	17.3551	0.00769504	8.15816	0.000104986
DLX6	distal-less homeobox 6	T65128	239309_at	4.60407	0.01014	8.14274	0.00508635
LEF1	lymphoid enhancer-binding factor 1	AF288571	221558_s_at	1.91654	0.000255728	8.03573	0.00371423
KIAA1462	KIAA1462	AL553774	231842_at	0.867457	0.158581	7.77719	0.000117044
DLC1	deleted in liver cancer 1	AF026219	210762_s_at	3.97646	0.0020836	7.76593	0.00850154
SOX9	SRY (sex determining region Y)-box 9	NM_000346	202936_s_at	4.15324	6.15975e-06	7.62194	9.34754e-07
SCUBE3	signal peptide, CUB domain, EGF-like 3	AI733234	228407_at	0.789827	0.273315	7.61847	3.6479e-07
GATA3	GATA binding protein 3	AI796169	209602_s_at	4.30359	2.75734e-05	7.50102	0.00700009
GATA3	GATA binding protein 3	BC003070	209604_s_at	5.09306	0.0210603	7.48081	9.6042e-06
PAX3	paired box 3	AA194168	231666_at	1.51755	0.00166506	7.46713	0.00562698
RGS5	regulator of G-protein signaling 5	AF159570	209071_s_at	31.6102	0.0138015	7.43436	0.0217502
DNAJC15	DnaJ (Hsp40) homolog, subfamily C, member 15	NM_013238	218435_at	2.94191	4.84666e-05	7.33258	0.00309413
DLX6	distal-less homeobox 6	AA040332	242940_x_at	4.22006	0.000538523	7.08758	8.79825e-07
RGS5	regulator of G-protein signaling 5	NM_025226	218353_at	47.83	0.00405652	9.30237	0.0446764
---	---	AW207243	238617_at	1.24853	0.0280169	6.9747	0.000151851
HAPLN1	hyaluronan and proteoglycan link protein 1	U43328	205523_at	1.16038	0.200145	3.30639	0.0668864
GREM2	gremlin 2, cysteine knot superfamily, homolog (Xenopus laevis)	BF064262	240509_s_at	1.04454	0.458757	2.93325	0.121704
DLC1	deleted in liver cancer 1	AA524250	224822_at	3.40564	0.000360092	6.9608	0.000921781
GPR177	G protein-coupled receptor 177	AL534095	228950_s_at	4.11557	0.000112969	6.95849	5.16806e-05
GPR177	G protein-coupled receptor 177	AA775681	221958_s_at	2.3634	0.000231109	6.8447	0.000111462
SHD	Src homology 2 domain containing transforming protein D	AW452918	227845_s_at	0.932165	0.441585	6.84255	0.00468376
PRRX1	paired related homeobox 1	AA775472	226695_at	2.95109	0.010851	6.84022	0.0283098
TNFRSF19	tumor necrosis factor receptor superfamily, member 19	BF432648	227812_at	2.18346	0.00450083	6.79204	8.30277e-06
RGS5	regulator of G-protein signaling 5	AF493929	1555725_a_at	24.5922	0.0266636	6.78692	0.0415325
HHIPL2	HHIP-like 2	NM_024746	220283_at	2.38392	0.000364431	6.65706	2.59637e-05
COL11A1	collagen, type XI, alpha 1	J04177	37892_at	28.8184	0.0086266	6.64913	8.9917e-05
---	---	AW378585	238847_at	1.93374	0.000728442	6.48691	0.00680862
COL2A1	collagen, type II, alpha 1	X16468	217404_s_at	1.15459	0.114487	6.34836	0.00629565
LIMCH1	LIM and calponin homology domains 1	AB029025	212328_at	4.47302	0.00012267	6.28538	0.0097937
HOXD10	homeobox D10	AW299531	229400_at	2.66108	0.00659259	6.24195	0.00246769
NR2F1	Chicken ovalbumin upstream promoter transcription factor (COUP-TF)	AI951185	209505_at	1.68734	0.00132402	6.22072	0.0409224
C13orf15	chromosome 13 open reading frame 15	NM_014059	218723_s_at	2.49594	0.000341927	6.18853	0.0176685
---	---	AI057226	243756_at	0.901825	0.547761	6.18199	0.0203883
LOC145786	hypothetical protein LOC145786	AV699825	229178_at	1.30109	0.0143706	6.11056	0.00394777
GPR177	G protein-coupled receptor 177	AL534095	228949_at	4.77022	0.00272398	6.02658	0.0043344
HOXB3	homeobox B3	AW510657	228904_at	1.2877	0.00382155	6.02548	3.08488e-06
FOXC1	forkhead box C1	NM_001453	1553613_s_at	2.1576	0.106335	6.0125	0.00024927
---	---	BF223214	244867_at	2.50935	0.0121165	5.99056	1.24959e-05
SGCG	sarcoglycan, gamma (35kDa dystrophin-associated glycoprotein)	NM_000231	207302_at	1.46646	0.0332876	5.87151	0.0012488
BMP2	bone morphogenetic protein 2	NM_001200	205290_s_at	5.60322	0.0273105	5.83587	0.0148266
CFC1	cripto, FRL-1, cryptic family 1	AA757630	236724_at	0.976252	0.824947	5.80125	4.45262e-06
EBF2	early B-cell factor 2	NM_022659	220392_at	1.0588	0.437241	5.74743	0.0229148
PLAGL1	pleiomorphic adenoma gene-like 1	NM_002656	207002_s_at	1.51225	0.00644513	5.69263	8.42037e-06
HOXA1	homeobox A1	S79910	214639_s_at	1.96952	0.000873522	5.66696	0.0157597
CA8	carbonic anhydrase VIII	NM_004056	220234_at	6.91135	0.0108849	5.64631	6.09312e-07
CTHRC1	collagen triple helix repeat containing 1	AA584310	225681_at	2.56324	0.000662822	5.63305	0.00664125
TAGLN3	transgelin 3	NM_013259	204743_at	5.1839	6.77896e-06	5.58912	0.000167005
TFAP2A	transcription factor AP-2 alpha (activating enhancer binding protein 2 alpha)	NM_003220	204654_s_at	1.23346	0.124478	5.53611	0.0100466
C21orf37	chromosome 21 open reading frame 37	N56968	240801_at	1.32422	0.064747	3.42923	0.0659083
EVI1	ecotropic viral integration site 1	BG261252	226420_at	2.78986	0.00241444	2.98125	0.0700834
GATA3	GATA binding protein 3	AI796169	209603_at	2.88846	2.97481e-05	5.48203	0.0105482
NTS	neurotensin	NM_006183	206291_at	12.4101	0.00508326	5.4671	9.17854e-07
DLX6	distal-less homeobox 6	NM_005222	221289_at	3.14817	0.00137354	5.3818	0.000395144
HOXD10	homeobox D10	NM_002148	207373_at	2.50152	0.000337835	5.28851	0.000129159
HOXC4 /// HOXC6	homeobox C4 /// homeobox C6	NM_004503	206858_s_at	1.05967	0.569881	5.28522	0.0114607
IGFBP7	insulin-like growth factor binding protein 7	NM_001553	201163_s_at	9.56424	0.0135743	5.27629	6.33321e-05
AHNAK	AHNAK nucleoprotein	BG287862	211986_at	4.82497	0.000198435	5.26359	0.000201422
SKAP2	src kinase associated phosphoprotein 2	NM_003930	204362_at	1.72966	0.00224698	5.23766	3.5681e-05
CASZ1	castor zinc finger 1	AI085338	243386_at	1.40382	0.0162422	5.20289	0.000278769
CXCL14	chemokine (C-X-C motif) ligand 14	AF144103	222484_s_at	11.4498	1.93477e-05	5.20011	0.000402379
CDKN2A	cyclin-dependent kinase inhibitor 2A (melanoma, p16, inhibits CDK4)	U38945	209644_x_at	3.10992	0.000326301	5.19304	0.000163754
HOXB7	homeobox B7	NM_004502	204779_s_at	1.06865	0.419249	3.27174	0.0539599
FOXP2	forkhead box P2	AW291402	243278_at	0.878462	0.141766	3.63449	0.06488
---	---	R33750	238808_at	1.16626	0.243722	2.33682	0.0115306
PLAGL1	pleiomorphic adenoma gene-like 1	BG547855	209318_x_at	1.42424	0.121356	5.18978	0.00190866
PRDM1	PR domain containing 1, with ZNF domain	AI692659	228964_at	10.6939	0.00319244	5.13825	0.00744742
MYLK3	myosin light chain kinase 3	BF114815	217623_at	1.0742	0.516389	5.13352	0.000357888
FGF9	fibroblast growth factor 9 (glia-activating factor)	NM_002010	206404_at	1.26184	0.239297	5.09252	0.0393733
COL11A1	collagen, type XI, alpha 1	NM_001854	204320_at	20.7349	0.0118089	5.06254	0.000156911
---	---	AW244016	227762_at	0.859993	0.31212	3.12835	0.0676016
EN1	engrailed homeobox 1	NM_001426	220559_at	0.533597	0.000576476	5.0302	0.00922975
GREM1	gremlin 1, cysteine knot superfamily, homolog (Xenopus laevis)	AF154054	218468_s_at	11.772	0.0021184	5.01454	0.00638281
GATA5	GATA binding protein 5	N72525	238197_at	0.533863	0.00246792	4.98907	0.00766805
FOXP2	forkhead box P2	AW167727	235201_at	1.36837	0.00311769	4.96801	6.50081e-06
LIMCH1	LIM and calponin homology domains 1	AK026815	212327_at	3.09755	1.56625e-05	4.93668	0.0133614
FLJ45983	hypothetical LOC399717	AI631850	240192_at	1.11106	0.233789	4.92899	5.97176e-05
COL9A2	collagen, type IX, alpha 2	AI733465	213622_at	1.0346	0.796926	4.92332	0.000212678
MEIS2	Meis homeobox 2	NM_020149	207480_s_at	3.92462	0.0490798	4.91693	1.96647e-07
BAALC	brain and acute leukemia, cytoplasmic	NM_024812	218899_s_at	1.32943	0.0456805	4.91352	0.00051792
HOXC4	homeobox C4	AW299598	206194_at	1.23236	0.197309	4.89885	0.027412
LOC145786	CDNA FLJ13221 fis, clone NT2RP4002075	AA912476	229073_at	1.12358	0.105847	4.86279	0.00117129
SKAP2	src kinase associated phosphoprotein 2	N21390	225639_at	1.42652	0.076165	4.8564	0.000246124
DLK1	delta-like 1 homolog (Drosophila)	U15979	209560_s_at	1.56228	0.00344398	4.83662	6.57166e-05
---	---	AI861874	230935_at	1.42365	0.00118059	4.8312	1.04477e-05
BTG2	BTG family, member 2	NM_006763	201236_s_at	12.1572	0.000483697	4.83116	0.00665563
CXCL14	chemokine (C-X-C motif) ligand 14	NM_004887	218002_s_at	10.1359	0.00258822	4.83094	0.00266487
THSD7A	thrombospondin, type I, domain containing 7A	AI740914	230008_at	0.840316	0.0898164	4.79773	0.0150231
THSD7A	thrombospondin, type I, domain containing 7A	R33964	214920_at	0.813548	0.0804065	4.76631	6.09739e-06
POU3F2	POU class 3 homeobox 2	BE855760	242455_at	13.9878	0.000410247	4.76237	9.28268e-05
DLL1	delta-like 1 (Drosophila)	AF196571	224215_s_at	0.492734	0.00177285	4.67977	0.000131828
RASSF9	Ras association (RalGDS/AF-6) domain family (N-terminal) member 9	AF056209	210335_at	2.92067	6.13278e-05	4.66393	0.0218356
HYMAI	hydatidiform mole associated and imprinted (non-protein coding)	AF241534	215513_at	0.927887	0.750442	4.65782	0.000478669
---	---	AI393695	235664_at	3.34778	0.000220136	4.65285	0.00171107
HES4	hairy and enhancer of split 4 (Drosophila)	NM_021170	227347_x_at	0.758021	0.173309	4.6252	6.01828e-06
SPHK1	sphingosine kinase 1	NM_021972	219257_s_at	3.6169	4.87179e-06	4.61075	0.000765402
PKP2	plakophilin 2	NM_004572	207717_s_at	2.53091	0.0141621	4.59447	9.56392e-05
CAV1	caveolin 1, caveolae protein, 22kDa	AU147399	212097_at	52.3971	0.009811	4.58613	0.00101747
---	---	AW117383	243907_at	1.0263	0.76093	4.58506	0.0201301
GAD1	glutamate decarboxylase 1 (brain, 67kDa)	NM_000817	205278_at	7.23947	2.10141e-06	4.57475	3.12783e-07
NEDD9	neural precursor cell expressed, developmentally down-regulated 9	U64317	202150_s_at	5.24625	0.0266566	4.56963	0.00851871
PLAGL1	pleiomorphic adenoma gene-like 1	NM_006718	207943_x_at	1.45302	0.00659888	4.54672	0.000142007
FRMD4B	FERM domain containing 4B	AU145019	213056_at	1.91597	0.0191167	4.53479	5.08069e-05
NAALAD2	N-acetylated alpha-linked acidic dipeptidase 2	AJ012370	222161_at	1.259	0.0581205	4.51543	8.42685e-06
GREM2	gremlin 2, cysteine knot superfamily, homolog (Xenopus laevis)	NM_022469	220794_at	1.21201	0.0982051	4.46416	0.000182359
IGFBP7	insulin-like growth factor binding protein 7	NM_001553	201162_at	5.78673	0.00322394	4.46301	0.000272302
HEY1	hairy/enhancer-of-split related with YRPW motif 1	R61374	44783_s_at	1.17965	0.0417662	4.4598	0.0178063
NR2F2	nuclear receptor subfamily 2, group F, member 2	M64497	209121_x_at	1.91013	0.00128218	4.36876	0.00114036
DACH1	dachshund homolog 1 (Drosophila)	AI650353	228915_at	1.7526	0.0138733	2.87915	0.0396067
HOXD13	homeobox D13	AI971104	236681_at	2.4397	0.000327913	4.32807	4.82507e-05
CRYBA1	crystallin, beta A1	NM_005208	206982_at	3.73172	0.000617737	4.29339	0.00390799
FAM123A	family with sequence similarity 123A	BE046923	230496_at	0.755943	0.0925874	4.28331	0.00209007
SLC25A18	solute carrier family 25 (mitochondrial carrier), member 18	AY008285	223605_at	3.03926	0.000144655	4.24861	8.20809e-05
ZNF503	zinc finger protein 503	AA603467	227195_at	5.05345	1.89357e-05	4.2318	0.000387753
THSD7A	thrombospondin, type I, domain containing 7A	BF447246	213894_at	0.851371	0.120823	4.2153	6.31324e-05
ZFHX3	zinc finger homeobox 3	AI288759	226137_at	5.10501	0.0295014	4.21158	6.01709e-05
ARID5B	AT rich interactive domain 5B (MRF1-like)	BG285011	212614_at	13.4082	0.0141204	4.18375	3.84063e-06
SP5	Sp5 transcription factor	AI380207	235845_at	2.70838	0.000105079	4.16876	0.00656437
FLJ16779	hypothetical LOC100192386	N47328	239509_at	1.02278	0.887338	3.08467	0.0146574
HOXA9	homeobox A9	U41813	214651_s_at	1.1229	0.13027	2.13576	0.0652234
BMP4	bone morphogenetic protein 4	D30751	211518_s_at	1.51486	0.00244654	4.16837	0.000729074
---	---	AI803010	239503_at	4.96472	8.07082e-05	4.15564	0.000331209
---	---	R62588	240815_at	1.25389	0.00870863	2.11584	0.124996
CXCR4	chemokine (C-X-C motif) receptor 4	AJ224869	217028_at	3.86072	5.51539e-05	4.11544	0.000898019
CAV1	caveolin 1, caveolae protein, 22kDa	NM_001753	203065_s_at	34.7537	0.0154693	4.10806	0.000447299
DUSP27	dual specificity phosphatase 27 (putative)	AI822125	232252_at	1.24016	0.316395	4.03678	0.00878542
LOC100134685	hypothetical protein LOC100134685	AI658704	240624_x_at	1.18408	0.115466	4.02955	3.81251e-05
CXCR7	chemokine (C-X-C motif) receptor 7	AI817041	212977_at	0.895058	0.181324	4.02413	0.0006404
IGFBP5	insulin-like growth factor binding protein 5	AW007532	211959_at	5.35066	0.000617526	3.97727	0.000484958
HAS2	Has2	AI374739	230372_at	0.529623	0.0185074	3.96605	0.000248817
CCL2	chemokine (C-C motif) ligand 2	S69738	216598_s_at	2.88908	3.71849e-05	3.95781	0.000122674
ALCAM	activated leukocyte cell adhesion molecule	AA156721	201952_at	2.43803	2.0727e-06	3.91199	9.55365e-05
PM20D2	peptidase M20 domain containing 2	AI654133	225421_at	7.20916	0.00925823	3.90914	0.000235855
FOXG1	forkhead box G1	NM_005249	206018_at	1.90484	0.00138985	3.90285	0.000500051
---	---	AW081685	236553_at	0.766095	0.0296215	3.90175	0.000109931
HES1	hairy and enhancer of split 1, (Drosophila)	BE973687	203394_s_at	2.14873	0.000102491	3.86958	2.18122e-06
SPON2	spondin 2, extracellular matrix protein	NM_012445	218638_s_at	1.51313	4.50461e-05	3.86832	0.0057329
RNF43	ring finger protein 43	NM_017763	218704_at	1.86883	1.61677e-05	3.83029	0.0250233
EYA1	eyes absent homolog 1 (Drosophila)	AJ000098	214608_s_at	2.02576	0.00727475	3.82239	0.000903754
USP18	ubiquitin specific peptidase 18	NM_017414	219211_at	1.58748	0.000901587	3.79884	0.000600366
TANC1	tetratricopeptide repeat, ankyrin repeat and coiled-coil containing 1	AB051515	225308_s_at	2.87974	0.000280959	3.77837	5.7167e-05
HOXD4	homeobox D4	NM_014621	205522_at	1.26356	0.267391	3.77572	0.00316293
PCDH17	protocadherin 17	N69091	228863_at	7.30214	3.92073e-06	3.77378	0.000739923
LOC641518	hypothetical protein LOC641518	AA992805	243362_s_at	1.13492	0.0267399	3.76989	0.0292215
ATP2B4	ATPase, Ca++ transporting, plasma membrane 4	AW517686	212135_s_at	2.24932	0.000439234	3.76817	1.41437e-05
ROR2	receptor tyrosine kinase-like orphan receptor 2	NM_004560	205578_at	0.725734	0.0264704	3.768	0.000130455
CCDC92	coiled-coil domain containing 92	NM_025140	218175_at	2.26657	4.77268e-07	3.73935	0.00709733
TFAP2B	transcription factor AP-2 beta (activating enhancer binding protein 2 beta)	NM_003221	1553394_a_at	1.06597	0.629036	3.73738	0.00241921
SLC16A3	solute carrier family 16, member 3 (monocarboxylic acid transporter 4)	NM_004207	202856_s_at	2.71725	0.000225501	3.70949	5.59531e-05
RGS5	regulator of G-protein signaling 5	AI183997	209070_s_at	30.492	0.0056613	6.83178	0.0538411
SIX3	SIX homeobox 3	NM_005413	206634_at	0.744031	0.111292	3.68892	0.000125851
HOXD1	homeobox D1	NM_024501	205975_s_at	1.87438	0.00785612	3.67655	0.00171399
HAPLN1	hyaluronan and proteoglycan link protein 1	AI760252	230895_at	1.14875	0.137873	1.89465	0.00520814
DKFZP586H2123	regeneration associated muscle protease	AI671186	213661_at	2.60687	0.000901593	3.65906	0.00100751
---	---	AA156240	212444_at	3.65855	0.0066933	3.64164	0.00032799
GPRC5A	G protein-coupled receptor, family C, group 5, member A	NM_003979	203108_at	4.25215	0.000958556	3.64133	0.000874828
---	---	BF344237	214803_at	4.82892	0.000171385	3.64097	0.000512934
SKAP2	src kinase associated phosphoprotein 2	AC003999	216899_s_at	1.26195	0.199557	3.24559	0.0310558
ANKRD43	ankyrin repeat domain 43	AI744123	230238_at	1.14584	0.250093	2.18643	0.0150978
IRX5	iroquois homeobox 5	U90304	210239_at	5.86762	4.18651e-06	3.63195	5.25609e-05
IL11	interleukin 11	NM_000641	206924_at	4.02943	0.000560146	3.62665	0.000221536
DACH1	dachshund homolog 1 (Drosophila)	AW772082	205471_s_at	1.5961	0.0197892	2.56296	0.0402302
MAF	v-maf musculoaponeurotic fibrosarcoma oncogene homolog (avian)	AA442149	1566324_a_at	0.910418	0.47229	2.22089	0.0496531
GREM1	gremlin 1, cysteine knot superfamily, homolog (Xenopus laevis)	NM_013372	218469_at	7.32519	0.000344439	3.62112	4.32405e-05
HOXB7	homeobox B7	S49765	216973_s_at	1.16559	0.211188	2.41945	0.0165394
LOC100131914	hypothetical protein LOC100131914	AW444944	240382_at	1.22446	0.103557	3.60414	0.0290282
CLDN10	claudin 10	NM_006984	205328_at	2.31679	0.00144729	3.59203	0.00849382
CRIP2	cysteine-rich protein 2	U36190	208978_at	1.97663	0.0124112	3.51995	3.22016e-06
SMAD9	SMAD family member 9	AA934610	227719_at	0.892408	0.357899	3.49718	2.18131e-06
HOXA3	homeobox A3	AW137982	235521_at	1.11085	0.17264	3.44198	0.016054
---	---	AL134451	236750_at	0.86107	0.199958	3.44042	0.0025655
HOXD11	homeobox D11	NM_021192	214604_at	2.2482	0.000239769	3.4388	0.000230391
---	---	AL049337	215768_at	0.884581	0.678104	3.42971	9.95941e-05
MPPED2	metallophosphoesterase domain containing 2	BE645386	215692_s_at	0.728615	0.121701	2.51741	0.0226773
FRMD6	FERM domain containing 6	N30138	225464_at	3.18918	0.0307711	3.41448	0.00521994
NAALAD2	N-acetylated alpha-linked acidic dipeptidase 2	BC027594	1554507_at	1.04757	0.377875	1.8927	0.00578907
SLC35D3	solute carrier family 35, member D3	BE670584	231341_at	0.492626	0.000325114	3.10886	0.0532913
KAT2B	P300/CBP-associated factor (P/CAF)	AV735100	239585_at	0.98487	0.836263	1.80295	0.00493396
---	---	BF315468	229493_at	1.34699	0.0282101	3.41122	4.49971e-05
PAX6	paired box 6	AW088232	235795_at	0.916569	0.5796	1.76785	0.00295974
EFHD1	EF-hand domain family, member D1	BC002449	209343_at	0.959431	0.545967	3.40112	0.000167859
OLFML2A	olfactomedin-like 2A	AL050002	213075_at	0.707734	0.00179335	3.39823	1.00428e-05
CXCR4	chemokine (C-X-C motif) receptor 4	L01639	209201_x_at	2.96784	0.00380406	3.38849	0.00715532
IER5L	immediate early response 5-like	BF110608	226552_at	2.28306	0.00107204	3.38826	0.00172793
FRMD6	FERM domain containing 6	AL040051	225481_at	2.64653	0.0155237	3.38792	0.00710244
ZIC1	Zic family member 1 (odd-paired homolog, Drosophila)	NM_003412	206373_at	1.45134	0.00351806	3.38513	0.0172371
C6orf124 /// LOC729439	chromosome 6 open reading frame 124 /// similar to HGC6.4	AB016898	210409_at	1.01738	0.757933	3.37989	8.56919e-07
RP1-177G6.2	hypothetical protein LOC286411	AV753446	1557133_at	1.2209	0.0198051	1.91468	0.00492481
ZNF436	zinc finger protein 436	AB051497	226113_at	2.36567	5.13259e-05	3.35474	0.00789567
---	---	BF968097	229072_at	0.960487	0.565257	3.34577	0.00203506
CITED2	Cbp/p300-interacting transactivator, with Glu/Asp-rich carboxy-terminal domain, 2	NM_006079	207980_s_at	3.0718	0.00250454	3.34548	4.22548e-05
PDE4D	phosphodiesterase 4D, cAMP-specific (phosphodiesterase E3 dunce homolog, Drosophila)	BC008390	1554717_a_at	1.24887	0.0877899	1.84879	0.0013624
MOXD1	monooxygenase, DBH-like 1	AY007239	209708_at	1.6482	0.000102892	3.3221	2.91678e-05
TMCC3	transmembrane and coiled-coil domain family 3	N51717	235146_at	0.732401	0.00711552	3.31339	0.00680322
MPPED2	metallophosphoesterase domain containing 2	NM_001584	205413_at	1.61066	0.00347395	3.31253	5.42821e-05
LOC645323	hypothetical LOC645323	AA464844	230272_at	1.78369	0.022715	3.30846	0.00858524
---	---	AL049443	215306_at	0.562866	0.00269527	3.3058	0.00017177
HOXB2	homeobox B2	NM_002145	205453_at	1.20797	0.0882179	3.30418	0.00456966
BMP2	bone morphogenetic protein 2	AA583044	205289_at	3.36303	0.0257002	3.29271	2.19955e-05
NKAIN4	Na+/K+ transporting ATPase interacting 4	BF593263	228017_s_at	0.743349	0.00180771	3.29187	2.7179e-05
---	---	AA489100	228390_at	1.13542	0.186271	3.28957	9.70246e-05
BOC	Boc homolog (mouse)	W72626	225990_at	0.778595	0.0263369	3.28166	0.000555832
ALCAM	activated leukocyte cell adhesion molecule	BF242905	201951_at	2.08064	0.0108406	3.27993	0.000657146
KLHL4	kelch-like 4 (Drosophila)	BF215673	214591_at	1.93648	0.00111665	3.27066	0.000156325
RGS20	regulator of G-protein signaling 20	AF074979	210138_at	6.04336	2.75916e-05	3.26714	8.22186e-05
TMOD1	tropomodulin 1	NM_003275	203662_s_at	1.94302	0.000310746	3.26221	0.000121343
SKAP2	src kinase associated phosphoprotein 2	AB014486	204361_s_at	1.67726	0.00400672	3.25463	0.000638894
---	---	AL833045	1559360_at	0.789534	0.0987144	3.25184	0.00631767
RFX4	regulatory factor X, 4 (influences HLA class II expression)	AF332192	223673_at	0.90031	0.396842	2.3288	0.0773722
KAT2B	K(lysine) acetyltransferase 2B	AV727449	203845_at	0.80557	0.174856	3.2481	0.000192041
RP4-621O15.2	hypothetical protein FLJ31401	NM_152664	1553299_at	1.14607	0.0416486	1.76733	6.42591e-05
DAB2	disabled homolog 2, mitogen-responsive phosphoprotein (Drosophila)	NM_001343	201280_s_at	5.58708	0.0292463	3.24601	0.0247337
HOXA11AS	HOXA11 antisense RNA (non-protein coding)	AA622837	230666_at	0.89335	0.477016	3.2413	0.000744037
ATP2B4	ATPase, Ca++ transporting, plasma membrane 4	AW517686	212136_at	2.10191	0.032551	3.23873	5.94961e-05
COL6A1	collagen, type VI, alpha 1	AA292373	213428_s_at	0.805662	0.0246207	3.21986	4.33266e-05
---	---	BF801735	238712_at	1.35953	0.0390242	3.21768	0.00181256
MSX2	msh homeobox 2	D89377	210319_x_at	1.64076	0.0184071	3.21657	9.72389e-05
NLRP1	NLR family, pyrin domain containing 1	NM_021730	218380_at	2.53335	1.62736e-05	3.21389	7.4572e-06
LHFP	lipoma HMGIC fusion partner	NM_005780	218656_s_at	2.83282	0.000300353	3.2115	2.39803e-06
TWIST1	twist homolog 1 (Drosophila)	X99268	213943_at	6.33832	0.020265	3.19824	3.93936e-07
MYLC2PL	myosin light chain 2, precursor lymphocyte-specific	BC002778	221659_s_at	3.73868	5.70115e-05	3.18177	0.000134348
---	---	BE856980	230961_at	0.781833	0.238002	2.30362	0.042761
CBX4	chromobox homolog 4 (Pc class homolog, Drosophila)	AI570531	227558_at	1.42418	0.0118103	3.14541	0.000108539
C2orf55	chromosome 2 open reading frame 55	AW249666	228067_at	1.24582	0.250462	3.1259	0.034385
SOX1	SRY (sex determining region Y)-box 1	BE504430	237472_at	1.02782	0.661531	3.11609	0.0236596
HOXD13	homeobox D13	NM_000523	207397_s_at	2.00972	0.00166333	3.1106	0.0225005
GRHL1	grainyhead-like 1 (Drosophila)	BE566136	222830_at	1.13916	0.285758	3.11553	0.00267478
CITED2	Cbp/p300-interacting transactivator, with Glu/Asp-rich carboxy-terminal domain, 2	AF109161	209357_at	2.97492	0.000230073	3.10072	0.000161298
FOXC1	forkhead box C1	AU145890	213260_at	1.18913	0.0662505	3.09986	0.00114477
IGFBPL1	insulin-like growth factor binding protein-like 1	AL522781	227760_at	2.70965	5.07084e-06	3.07087	6.70897e-05
WFDC1	WAP four-disulfide core domain 1	NM_021197	219478_at	0.913145	0.369661	3.06292	0.000544802
---	---	AI360054	230818_at	0.457969	0.00810472	3.06083	0.0119778
WNT5B	wingless-type MMTV integration site family, member 5B	NM_030775	221029_s_at	1.5667	0.00141024	3.05694	0.000544534
FZD10	frizzled homolog 10 (Drosophila)	NM_007197	219764_at	0.801503	0.149964	3.05581	3.10349e-05
ZCCHC24	zinc finger, CCHC domain containing 24	AA131324	212419_at	0.630722	0.0183976	3.0405	3.75199e-05
EPHB3	EPH receptor B3	NM_004443	204600_at	1.20035	0.134821	3.03275	0.000397157
GATA2	GATA binding protein 2	AL563460	209710_at	1.52913	0.00176885	3.02995	0.000390339
SGK1	serum/glucocorticoid regulated kinase 1	NM_005627	201739_at	7.53541	0.0100557	3.02321	0.0071438
ANO4	anoctamin 4	BF589515	236420_s_at	5.48928	7.29099e-07	3.01526	1.43837e-05
IRX1	iroquois homeobox 1	AI870306	230472_at	0.447744	0.00242536	3.01224	0.00766346
CTXN3	cortexin 3	AW264294	231391_at	0.977634	0.722294	1.70744	0.0386238
PALLD	palladin, cytoskeletal associated protein	AK025843	200906_s_at	2.47514	0.129348	3.00555	0.00838501
RHOB	ras homolog gene family, member B	AI263909	212099_at	2.16734	0.000842947	2.98078	0.00161038
CLIC5 /// LOC100131610	chloride intracellular channel 5 /// similar to chloride intracellular channel 5	NM_016929	219866_at	1.01707	0.894831	2.97912	0.00020734
HAS2	hyaluronan synthase 2	NM_005328	206432_at	0.806175	0.106943	2.97376	0.000408507
KISS1R	KISS1 receptor	AI819198	242517_at	0.397418	0.000571874	2.97257	5.59598e-05
---	---	AK022645	232257_s_at	2.37322	0.0163451	1.96205	0.000227665
FRMD3	FERM domain containing 3	BF110588	230645_at	1.89131	0.00133141	2.80875	0.0644013
COL13A1	collagen, type XIII, alpha 1	M33653	211343_s_at	0.338865	0.000169329	2.96847	0.000108686
C1orf213	chromosome 1 open reading frame 213	AW298597	229086_at	1.81143	0.0133824	2.96844	0.00158771
SCN9A	sodium channel, voltage-gated, type IX, alpha subunit	BE856807	229199_at	1.0968	0.0287363	1.74124	0.110624
FLJ25694	hypothetical protein FLJ25694	NM_173604	1553614_a_at	1.058	0.153357	1.87569	0.047293
PAX7	paired box 7	AI250939	1556638_at	1.16078	0.139294	2.968	4.18041e-05
SYNGR1	synaptogyrin 1	BC000731	210613_s_at	1.86137	3.42405e-05	2.96754	1.48256e-06
HCRTR2	hypocretin (orexin) receptor 2	NM_001526	207393_at	2.09897	0.007992	2.96473	0.00144872
TXNIP	thioredoxin interacting protein	AA812232	201008_s_at	4.78897	0.0677503	2.96386	0.033342
---	---	N49237	228724_at	2.55447	3.31188e-05	2.96352	0.00045666
EPHB3	EPH receptor B3	X75208	1438_at	1.33503	0.0230117	2.96327	3.89439e-05
EN2	engrailed homeobox 2	NM_001427	207060_at	1.44064	9.53498e-05	1.91863	3.46152e-07
NKAIN4	Na+/K+ transporting ATPase interacting 4	BF593263	228018_at	0.762643	0.0272712	2.96246	3.79143e-06
IL6ST	interleukin 6 signal transducer (gp130, oncostatin M receptor)	AL049265	212195_at	2.21332	0.000140802	2.96198	7.46073e-06
STOM	stomatin	M81635	201061_s_at	1.15152	0.0145109	2.95967	2.96017e-05
LIMCH1	LIM and calponin homology domains 1	AK027231	212325_at	3.58288	0.00606523	2.95467	0.00912783
HOXD4	homeobox D4	NM_014621	1552337_s_at	1.50993	0.0263897	2.95075	0.000169598
---	---	BF514585	243546_at	1.0017	0.992988	2.52583	0.0240113
SESN3	sestrin 3	BF685808	235683_at	2.06921	0.00209563	2.94752	8.89676e-05
tcag7.1177	opposite strand transcription unit to STAG3	AL831967	1553971_a_at	0.680141	0.00638508	2.94279	0.000475228
DAB2	disabled homolog 2, mitogen-responsive phosphoprotein (Drosophila)	N21202	201278_at	5.5884	0.00163137	2.94232	9.16818e-05
FAM123A	family with sequence similarity 123A	N66614	235465_at	1.06321	0.375838	2.93663	0.00460722
JUP /// KRT19	junction plakoglobin /// keratin 19	NM_002276	201650_at	1.25116	0.00688343	2.92143	0.000278459
NR2F2	nuclear receptor subfamily 2, group F, member 2	AL554245	215073_s_at	1.11818	0.137782	1.72403	0.0841452
RAI1	retinoic acid induced 1	BF984830	226143_at	1.21649	0.0923306	2.9197	0.0010039
---	---	AI821935	241457_at	0.913741	0.664522	2.54175	0.0299581
SOX3	SRY (sex determining region Y)-box 3	AI824954	214633_at	2.19632	7.46046e-05	2.91938	2.18488e-05
MYO10	myosin X	BC041694	1554026_a_at	1.90052	0.00377754	2.25262	0.00827688
NRK	Nik related kinase	AI653107	227971_at	3.85305	0.000104729	2.91299	8.98629e-05
THSD7A	CDNA clone IMAGE:4791783	AW612111	229159_at	0.740539	0.0348117	2.9094	2.78503e-05
HAPLN1	hyaluronan and proteoglycan link protein 1	NM_001884	205524_s_at	1.67395	0.00126195	2.90899	0.00580439
---	---	BE326919	230333_at	4.06667	0.0361704	2.89547	0.000929843
LOC645323	hypothetical LOC645323	AW015083	238850_at	1.53883	0.0148147	2.89505	0.000854683
PTCHD1	patched domain containing 1	AA148535	240041_at	1.38177	0.0302562	2.01892	0.00793817
DIO2	deiodinase, iodothyronine, type II	NM_013989	203700_s_at	1.7015	0.0161103	2.89353	0.000522674
C17orf91	chromosome 17 open reading frame 91	AF070569	214696_at	4.59166	0.0037995	2.89031	6.97997e-07
TXNIP	thioredoxin interacting protein	AI439556	201009_s_at	5.24057	0.0414015	2.88624	0.00611633
---	---	AI492388	228854_at	0.693179	0.0519228	2.88207	0.00793404
ANKRD55	Ankyrin repeat domain 55 (ANKRD55), transcript variant 1, mRNA	AA459699	240456_at	2.30955	0.0111149	1.7797	0.00540223
---	---	BM873997	1555929_s_at	1.90951	0.00667446	1.94732	0.0122558
RD3	retinal degeneration 3	AA719822	236563_at	1.10107	0.208037	2.8817	0.00299958
CDH10	cadherin 10, type 2 (T2-cadherin)	NM_006727	220115_s_at	2.69016	0.000633405	2.87794	0.00116212
ATP10D	ATPase, class V, type 10D	AI478147	213238_at	4.08089	0.000689752	2.87783	2.70158e-05
LTBP3	latent transforming growth factor beta binding protein 3	NM_021070	219922_s_at	3.08842	0.000417262	2.87777	5.78325e-05
FILIP1L	filamin A interacting protein 1-like	NM_014890	204135_at	8.92169	2.13128e-07	2.3084	0.00582153
LOC642587	CDNA FLJ33794 fis, clone CTONG1000009	AI375939	226755_at	2.36687	0.0219298	1.95731	0.000781187
NCALD	neurocalcin delta	AF251061	211685_s_at	1.35943	0.0293431	2.87203	0.000160563
FAM43A	family with sequence similarity 43, member A	AW264102	227410_at	4.72182	0.00843597	2.8718	0.000147954
LOC219688	hypothetical protein LOC219688	AK055656	1564385_at	0.988534	0.87589	1.91479	0.00901717
TMEM100	transmembrane protein 100	NM_018286	219230_at	1.27854	0.140892	1.88053	0.00301634
---	---	BF060978	237189_at	1.01877	0.851848	2.87054	0.00672942
HUNK	hormonally up-regulated Neu-associated kinase	T58129	1555935_s_at	1.19023	0.0875483	2.86894	0.000160392
SYNPR	synaptoporin	H11380	230303_at	1.268	0.0620001	1.92456	0.00847924
---	---	AA483467	1559280_a_at	1.07364	0.403902	2.86051	0.000174777
GPM6A	glycoprotein M6A	BF939489	209469_at	1.05406	0.578755	1.98953	0.0180049
SCN9A	sodium channel, voltage-gated, type IX, alpha subunit	NM_002977	206950_at	1.23461	0.300374	1.81957	0.0834505
PALLD	palladin, cytoskeletal associated protein	AU157932	200907_s_at	2.68735	0.0170672	2.85745	0.0155125
HEY1	hairy/enhancer-of-split related with YRPW motif 1	NM_012258	218839_at	1.11211	0.431007	2.84429	0.000224791
HIVEP3	human immunodeficiency virus type I enhancer binding protein 3	AI800713	235122_at	8.83993	0.0404562	2.84412	0.000965311
CNTN4	contactin 4	R42166	229084_at	0.593154	0.0239241	2.24199	0.00849173
FLJ34048	hypothetical transcript	AA129217	230882_at	1.34959	0.0262381	2.84292	0.00116122
ESRRG	estrogen-related receptor gamma	AF094518	209966_x_at	0.674207	0.00548504	2.8302	0.0473095
GADD45A	growth arrest and DNA-damage-inducible, alpha	NM_001924	203725_at	6.39766	0.00246563	2.82938	1.3777e-06
---	---	AW149422	228780_at	1.23769	0.00917094	1.52836	0.0490871
SMTNL2	smoothelin-like 2	AI193973	229730_at	0.661733	0.00917887	2.82588	0.00872521
TTC29	tetratricopeptide repeat domain 29	AF345910	223962_at	1.16825	0.272389	1.62106	0.000640805
---	---	AK000795	234563_at	0.919803	0.582258	1.99237	0.0170259
DAZ1 /// DAZ2 /// DAZ3 /// DAZ4 /// LOC732447	deleted in azoospermia 1 /// deleted in azoospermia 2 /// deleted in azoospermia 3 /// deleted in azoospermia 4 /// similar to deleted in azoospermia-like	NM_004081	207912_s_at	1.00281	0.972666	1.65519	0.00534967
---	---	AW190406	236035_at	0.826009	0.284908	1.7299	0.00519934
FOXF1	forkhead box F1	NM_001451	205935_at	0.987533	0.919977	1.92699	0.000771137
PTGS2	prostaglandin-endoperoxide synthase 2 (prostaglandin G/H synthase and cyclooxygenase)	NM_000963	204748_at	3.32125	0.00585469	2.82537	0.00116655
BAALC	brain and acute leukemia, cytoplasmic	AI870583	222780_s_at	1.10835	0.454365	2.81884	0.0163918
GRP	gastrin-releasing peptide	NM_002091	206326_at	0.879069	0.517417	2.81834	0.00459717
---	---	BC025343	1566229_a_at	1.48671	0.107749	1.80155	0.00930737
---	---	BC036484	1568920_at	0.993383	0.930468	1.56803	0.000625269
---	---	AU144294	215574_at	0.859453	0.468795	2.81631	3.86136e-05
NCAN	neurocan	NM_004386	205143_at	0.895824	0.492768	2.81551	0.00674132
---	---	AI431345	235652_at	0.606491	0.0132322	2.81325	0.00609983
NAALAD2	N-acetylated alpha-linked acidic dipeptidase 2	BC038840	1554506_x_at	1.04168	0.661114	1.51617	0.0906773
TMEM132E	transmembrane protein 132E	AI678145	243708_at	0.791105	0.00663389	2.16816	0.0508133
ZCCHC24	zinc finger, CCHC domain containing 24	AK024784	212423_at	0.513745	0.000169942	2.81119	2.95821e-06
FOXP1	forkhead box P1	AA654769	1558996_at	1.14981	0.548702	1.97729	0.000441303
MSX2	msh homeobox 2	D31771	205555_s_at	1.56728	0.00027929	2.80943	4.82156e-06
COL9A3	collagen, type IX, alpha 3	NM_001853	204724_s_at	0.514443	1.0366e-05	2.80806	0.00806832
HOXA7	homeobox A7	AF026397	206847_s_at	0.590438	0.00241892	2.8053	0.00304617
GALNT6	UDP-N-acetyl-alpha-D-galactosamine:polypeptide N-acetylgalactosaminyltransferase 6 (GalNAc-T6)	NM_007210	219956_at	1.929	0.000872262	2.79766	0.00197156
RBMS3	RNA binding motif, single stranded interacting protein	AA428240	238447_at	2.52716	0.0727706	1.63713	1.63262e-05
---	---	AI333596	235629_at	1.11348	0.332834	1.7359	0.00477691
PMP22	peripheral myelin protein 22	L03203	210139_s_at	7.026	0.00447548	2.78469	0.0198635
MXRA8	matrix-remodelling associated 8	AW888223	213422_s_at	1.66708	0.00458663	2.78228	0.000208538
---	---	AI475033	239448_at	0.891658	0.63879	1.96888	0.032057
COL4A6	collagen, type IV, alpha 6	AI889941	213992_at	0.865332	0.215083	2.77721	0.000528283
PALLD	palladin, cytoskeletal associated protein	NM_016081	200897_s_at	2.81903	0.000423059	2.77694	3.44639e-05
HES1	hairy and enhancer of split 1, (Drosophila)	NM_005524	203395_s_at	1.50267	0.00236539	2.77641	0.00023945
CYP26B1	cytochrome P450, family 26, subfamily B, polypeptide 1	NM_019885	219825_at	1.07847	0.306213	2.23051	0.0743552
PPAPDC1A	phosphatidic acid phosphatase type 2 domain containing 1A	BF130943	236044_at	2.15927	0.000283782	2.77379	2.26199e-05
FAM167A	family with sequence similarity 167, member A	BE856336	226614_s_at	0.973375	0.520973	2.77043	0.00075049
MBNL2	muscleblind-like 2 (Drosophila)	BE328496	203640_at	4.64284	0.0120464	1.8794	0.000317793
OPCML	opioid binding protein/cell adhesion molecule-like	AF070577	214111_at	1.36039	0.0316996	2.76464	0.00076123
LOXL1	lysyl oxidase-like 1	NM_005576	203570_at	0.848406	0.0557404	2.75517	0.00236061
ZFHX3	zinc finger homeobox 3	BG402859	242738_s_at	3.67054	0.00309847	2.75455	0.000139375
ANKRD1	ankyrin repeat domain 1 (cardiac muscle)	NM_014391	206029_at	11.4369	0.0154206	2.75405	0.00207807
PCDH17	protocadherin 17	NM_014459	205656_at	6.2819	0.0619552	2.75298	0.0383275
---	---	AA330389	238537_at	1.4624	0.00375148	1.89605	0.00142696
BCL6	B-cell CLL/lymphoma 6	NM_001706	203140_at	2.43145	0.0204693	2.74333	0.0121897
FEZF2	FEZ family zinc finger 2	NM_018008	221086_s_at	1.23531	0.133889	1.80902	0.0127332
LOC100132218 /// LOC728555	hypothetical protein LOC100132218 /// hypothetical LOC728555	AI469960	230653_at	0.91932	0.584166	2.26567	0.0116141
MAGEB3	melanoma antigen family B, 3	NM_002365	207579_at	0.903695	0.331796	1.87508	0.088206
NAIP	NLR family, apoptosis inhibitory protein	AI817801	204860_s_at	1.58551	0.00700865	1.72036	0.00948334
FEZF2	FEZ family zinc finger 2	AF064845	233972_s_at	1.28568	0.104998	2.73687	0.00659027
ABCC6	ATP-binding cassette, sub-family C (CFTR/MRP), member 6	AI084637	214033_at	1.08318	0.355147	2.72918	0.0234348
SAT1	spermidine/spermine N1-acetyltransferase 1	M55580	210592_s_at	4.83563	0.00130628	2.71646	4.7459e-05
NOG	noggin	AL575177	231798_at	1.43906	0.00243842	2.70422	1.27212e-05
---	---	BE883841	225123_at	0.736476	0.00509367	2.70314	3.41067e-05
---	---	BC032569	1554636_at	1.16409	0.257434	1.8234	0.0417992
---	---	AA543084	236480_at	0.804809	0.0430979	1.78029	0.00248786
ARL4C	ADP-ribosylation factor-like 4C	BC001051	202208_s_at	1.85346	0.0113664	2.69596	3.33796e-06
COMMD3	COMM domain containing 3	NM_012071	218048_at	1.67786	0.001634	2.69312	2.14807e-05
RCAN1	regulator of calcineurin 1	NM_004414	208370_s_at	5.53194	2.08057e-06	2.69089	0.000130584
GATA4	GATA binding protein 4	AV700724	205517_at	1.11572	0.474142	1.7588	0.0086959
---	---	AI629041	241991_at	1.17821	0.146347	1.97166	0.0142622
KLF5	Kruppel-like factor 5 (intestinal)	AF132818	209211_at	3.12913	0.00259959	1.83845	0.000963605
SNAI2	snail homolog 2 (Drosophila)	AI572079	213139_at	7.41191	1.23327e-05	2.68733	0.00019973
NRXN1	neurexin 1	BF509242	228547_at	1.62767	0.00971906	2.68651	0.00260142
FILIP1L	filamin A interacting protein 1-like	AF329092	1554966_a_at	8.9507	0.00240906	2.67389	3.09506e-05
FNDC5	fibronectin type III domain containing 5	AI760132	226096_at	1.24473	0.0226565	2.66695	0.000562388
LGALS3	lectin, galactoside-binding, soluble, 3	BC001120	208949_s_at	4.9434	0.013459	2.66497	3.91753e-08
CSAD	cysteine sulfinic acid decarboxylase	NM_015989	221139_s_at	1.46182	0.0259257	2.66028	0.00594288
CDKN1C	cyclin-dependent kinase inhibitor 1C (p57, Kip2)	R78668	213182_x_at	0.306198	1.10793e-05	2.65984	0.00550721
LOC100130278	hypothetical protein LOC100130278	AK094114	1563793_at	0.8857	0.330569	1.82678	0.0100577
GNG12	guanine nucleotide binding protein (G protein), gamma 12	N32508	222834_s_at	1.83913	0.222578	2.65937	8.90124e-05
---	---	BU689085	1557240_a_at	0.904973	0.546259	1.76736	0.00176408
EML1	echinoderm microtubule associated protein like 1	AI825937	204796_at	0.987634	0.907434	2.65904	7.24868e-06
DACT1	dapper, antagonist of beta-catenin, homolog 1 (Xenopus laevis)	NM_016651	219179_at	4.48055	0.00674484	2.65633	0.0225009
---	---	AL050097	233869_x_at	0.826433	0.0879687	1.63072	0.0939529
CDKN1C	cyclin-dependent kinase inhibitor 1C (p57, Kip2)	N33167	213348_at	0.317729	2.59876e-06	2.65132	0.00169117
TMC5	transmembrane channel-like 5	BG484769	240304_s_at	0.313873	0.000117965	2.65045	0.0228573
DKK1	dickkopf homolog 1 (Xenopus laevis)	NM_012242	204602_at	2.4537	0.0266836	2.64423	0.0392474
TJP3	tight junction protein 3 (zona occludens 3)	AC005954	35148_at	0.691419	0.0146925	2.64265	0.00159493
EGR1	Putative zinc finger protein mRNA, 3' flank	AI459194	227404_s_at	0.852269	0.494619	2.67894	0.0258804
FLJ45983	hypothetical LOC399717	AA846824	240827_at	1.091	0.458925	1.85672	0.000959085
---	---	BM041827	1560048_at	1.24654	0.0328556	1.46002	0.0054574
---	---	BC035904	1563015_at	4.59742	0.00255024	2.6393	6.20054e-05
NHSL1	NHS-like 1	AA503387	226490_at	5.77643	7.28619e-07	2.63539	2.64718e-05
GREM2	gremlin 2, cysteine knot superfamily, homolog (Xenopus laevis)	BE786990	235504_at	1.15035	0.31813	2.63454	0.0106915
KIF26B	kinesin family member 26B	NM_018012	220002_at	1.34794	0.0441235	2.63082	0.0105277
ICAM4	intercellular adhesion molecule 4 (Landsteiner-Wiener blood group)	NM_001544	207194_s_at	1.21354	0.0846968	1.72702	0.00270892
CCDC140	coiled-coil domain containing 140	NM_153038	1553485_at	1.07556	0.479141	2.61328	0.00495433
CXCR4	chemokine (C-X-C motif) receptor 4	AF348491	211919_s_at	2.37476	0.00812512	2.9273	0.0574905
ADAMTS9	ADAM metallopeptidase with thrombospondin type 1 motif, 9	NM_020249	220287_at	1.63116	0.00429998	2.60805	0.000203881
DYNC1I1	dynein, cytoplasmic 1, intermediate chain 1	NM_004411	205348_s_at	2.56916	1.17015e-05	2.60713	0.0216437
TIFA	TRAF-interacting protein with forkhead-associated domain	AA195074	226117_at	1.48627	0.0114699	2.60432	5.31129e-05
NKAIN4	Na+/K+ transporting ATPase interacting 4	AI758937	230668_at	0.834714	0.0361101	2.60271	0.000216237
ZFHX3	zinc finger homeobox 3	NM_006885	208033_s_at	2.10981	0.00160988	1.71224	0.0152079
PIK3R3	phosphoinositide-3-kinase, regulatory subunit 3 (gamma)	AF028785	211580_s_at	1.57924	0.00964853	2.25678	0.00788988
RPL27A	ribosomal protein L27a	BC004284	223707_at	2.86933	0.0052302	2.60011	2.28323e-06
IL6ST	interleukin 6 signal transducer (gp130, oncostatin M receptor)	AW242916	212196_at	1.79837	0.00775604	2.59276	0.0001973
---	---	AI446064	238009_at	1.38829	0.0921822	2.59187	0.00462442
WNT3	wingless-type MMTV integration site family, member 3	AA463626	229103_at	2.0978	0.00188372	2.59122	0.000178843
ANKRD6	ankyrin repeat domain 6	NM_014942	204672_s_at	2.38712	0.00261491	2.58263	0.00146785
GATA5	GATA binding protein 5	AW973240	238095_at	0.912173	0.373219	2.03409	0.0209439
CSGALNACT1	chondroitin sulfate N-acetylgalactosaminyltransferase 1	NM_018371	219049_at	4.54269	0.0288202	1.72507	0.00160557
CAPN9	calpain 9	AB038463	210641_at	0.805555	0.00746073	1.88178	0.0476097
---	---	AA808231	242025_at	0.916491	0.353888	1.81407	0.0903377
PKP2	plakophilin 2	AA888057	214154_s_at	1.45645	0.0242182	1.88804	0.0168079
---	---	AI343467	227140_at	9.48977	5.44236e-05	1.83644	0.00323033
TMEM132C	transmembrane protein 132C	AL122107	232313_at	0.820146	0.0257002	2.58041	0.0124089
LOC374491	TPTE and PTEN homologous inositol lipid phosphatase pseudogene	AL122103	233675_s_at	2.08171	0.0483103	1.73455	0.00599053
---	---	AI871589	231034_s_at	3.84015	0.013669	2.57975	0.00615559
---	---	AI480314	227498_at	1.00588	0.939507	1.66606	0.0640445
---	---	BF109387	230535_s_at	0.954792	0.450616	1.78657	0.00994322
GLRB	glycine receptor, beta	NM_000824	205280_at	1.78927	0.0123813	1.49043	0.00393044
ARL4C	ADP-ribosylation factor-like 4C	BG435404	202207_at	0.946383	0.41309	2.57846	0.000318218
ARL4C	ADP-ribosylation factor-like 4C	AW450363	202206_at	1.09883	0.699496	2.57718	0.000128402
MBD5	methyl-CpG binding domain protein 5	AI911379	227839_at	0.860294	0.114207	1.80499	0.0608303
IL6ST	interleukin 6 signal transducer (gp130, oncostatin M receptor)	BE856546	204863_s_at	1.70168	0.17797	1.64173	0.000866245
---	---	CA448125	1557050_at	1.1913	0.0818518	2.57717	0.00935373
ANO2	anoctamin 2	NM_020373	220111_s_at	0.987512	0.905966	2.575	0.000726799
C13orf18 /// LOC728970	chromosome 13 open reading frame 18 /// hypothetical LOC728970	AI129310	44790_s_at	1.38263	0.0139426	2.57489	0.000770081
GRRP1	glycine/arginine rich protein 1	NM_024869	220430_at	0.637174	0.0750595	2.56341	0.0190637
FKBP9	FK506 binding protein 9, 63 kDa	AL050187	212169_at	1.27832	0.0026379	2.56284	0.00348771
GLIPR2	GLI pathogenesis-related 2	AA284532	225604_s_at	0.787995	0.0721577	2.55937	0.00623231
PTCHD1	patched domain containing 1	NM_173495	1552848_a_at	1.36207	0.287926	2.55425	0.000193158
C1orf97	chromosome 1 open reading frame 97	BC005997	224444_s_at	0.904588	0.0265599	2.55246	8.93459e-07
FLJ44342	hypothetical LOC645460	AA046439	226419_s_at	2.75205	0.00161487	2.54717	0.00217226
CADM1	cell adhesion molecule 1	NM_014333	209030_s_at	1.27939	0.217974	2.54713	0.000133028
HOXA5	homeobox A5	NM_019102	213844_at	1.7395	0.00224911	1.76067	0.00492491
S100A10	Calpactin I light chain, 5'UTR region	BF126155	238909_at	7.82794	0.000648083	1.84165	0.00288716
---	---	BC036630	1561511_at	0.965799	0.67082	1.50124	0.0257586
---	---	AI810034	238139_at	0.854546	0.181965	1.70851	0.00232988
SMOC2	SPARC related modular calcium binding 2	AB014737	223235_s_at	0.788981	0.0537341	2.54219	0.00546376
SP6	Sp6 transcription factor	AI817264	228975_at	1.5358	0.00796587	2.54178	0.000101155
---	---	AW193531	243808_at	0.946528	0.62742	1.54631	0.0103164
---	---	AI686664	236947_at	1.16192	0.140764	1.53953	0.0364922
GLIPR2	GLI pathogenesis-related 2	H92988	225602_at	0.807531	0.0125478	2.54136	5.21961e-05
---	---	AI822094	244512_at	1.0025	0.982308	2.01993	0.00741479
MED13L	Mediator complex subunit 13-like, mRNA (cDNA clone MGC:163294 IMAGE:40146453)	AK025348	216109_at	1.0972	0.350309	1.62925	0.0070567
PSMG1	Down syndrome critical region gene 2 (DSCR2) mRNA, partial sequence, alternatively spliced	AI791303	238890_at	1.40552	0.000160361	2.53851	0.0231058
LRRC3B	leucine rich repeat containing 3B	AW027879	229085_at	3.28054	0.00035986	2.27615	0.00953369
RASL10A	RAS-like, family 10, member A	NM_006477	206850_at	0.790686	0.0485208	2.53755	0.000295391
SCD5	stearoyl-CoA desaturase 5	AL571375	224901_at	2.56105	0.0209389	2.53672	5.41456e-05
LYPD1	LY6/PLAUR domain containing 1	AL567376	212909_at	6.71592	9.60276e-05	3.34803	0.010685
GATA6	GATA binding protein 6	D87811	210002_at	2.71759	0.0242329	2.53472	0.00176823
---	---	AK091794	1563629_a_at	1.44418	0.0474318	2.53424	0.00158188
SLC5A3	solute carrier family 5 (sodium/myo-inositol cotransporter), member 3	AK024896	212944_at	2.00261	0.000175265	2.52963	1.29978e-05
CYP27C1	cytochrome P450, family 27, subfamily C, polypeptide 1	BC039307	1568868_at	1.66341	0.00125983	2.52828	0.000280994
---	---	AW418842	1557852_at	2.28753	0.129318	2.52727	0.00151862
CADM1	cell adhesion molecule 1	AF132811	209032_s_at	1.37358	0.119246	2.52607	0.000181592
CDH6	cadherin 6, type 2, K-cadherin (fetal kidney)	AU151483	205532_s_at	5.28324	7.08771e-05	2.52376	9.16094e-05
C10orf140	chromosome 10 open reading frame 140	AI363206	1559265_at	1.16095	0.365683	1.53653	0.0302099
---	---	AL359567	232793_at	1.65341	0.121226	2.51928	0.00305166
ZBTB16	zinc finger and BTB domain containing 16	NM_006006	205883_at	0.91984	0.454909	1.82492	0.0195268
---	---	AL137510	234034_at	2.09667	0.0146048	2.3102	0.00778105
---	---	AI678013	240165_at	0.8486	0.559413	1.96395	0.0211448
SERPINB9	serpin peptidase inhibitor, clade B (ovalbumin), member 9	AI986192	242814_at	0.813427	0.234657	2.51636	0.000411088
DOK3	docking protein 3	BC004564	223553_s_at	1.66091	0.00579052	2.50828	0.000129575
RUNX3	runt-related transcription factor 3	AA541630	204198_s_at	1.3302	0.00277071	2.50262	0.00236999
---	---	BC040647	1558613_at	1.07643	0.516747	2.49977	0.00379952
---	---	T87730	242500_at	0.933321	0.557433	1.69264	0.000773164
TTYH2	tweety homolog 2 (Drosophila)	BC004233	223741_s_at	0.420181	1.79172e-06	2.49941	0.00370211
---	---	BF055200	238571_at	1.0229	0.69446	2.49521	0.00583215
---	---	BC024748	1558007_s_at	1.61525	0.0219719	2.49501	0.00741342
LRRN3	leucine rich repeat neuronal 3	AI221950	209840_s_at	2.72327	0.00347617	2.49297	0.000270915
CDKN1C	cyclin-dependent kinase inhibitor 1C (p57, Kip2)	D64137	216894_x_at	0.325614	4.71624e-06	2.48681	0.0121697
LOC440934	(clone z177) retinal mRNA, repeat region	AA447560	230844_at	0.948433	0.593413	2.48455	0.00245148
REV3L	DNA polymerase zeta (REV3)	AA805939	238736_at	1.25252	0.192208	1.60253	0.0107062
VAMP8	vesicle-associated membrane protein 8 (endobrevin)	NM_003761	202546_at	2.19171	1.03266e-05	2.48425	0.000995618
ZNF436	zinc finger protein 436	AI829509	226114_at	2.04203	0.00182346	2.48394	0.00312007
PNRC1	proline-rich nuclear receptor coactivator 1	AF279899	209034_at	1.44882	0.0406697	2.48384	0.00665246
---	---	AW299568	230406_at	3.10459	0.00518923	2.47447	0.000281784
C1orf217	chromosome 1 open reading frame 217	BC000988	210711_at	0.927094	0.32418	1.82649	0.00260281
GADD45B	growth arrest and DNA-damage-inducible, beta	NM_015675	207574_s_at	5.40725	4.26292e-05	2.47351	3.377e-05
TBX1	T-box 1	AW074836	236926_at	1.05523	0.459628	2.47154	0.00132239
PDYN	prodynorphin	NM_024411	206803_at	0.704132	0.0579127	2.09179	0.0048896
PITX1	paired-like homeodomain 1	U70370	209587_at	1.03178	0.731619	2.46988	0.00078605
PRLR	prolactin receptor	AA843963	227629_at	0.97351	0.699477	1.65728	0.0305647
---	---	AL137429	232600_at	1.57606	0.0153399	1.67318	0.0180075
FLJ31485	hypothetical gene supported by AK056047; AK056281; AK123838	AL578526	243351_at	0.890404	0.230549	1.92872	0.0199077
TAGAP	T-cell activation RhoGTPase activating protein	AK025272	234050_at	1.24645	0.116826	1.55549	0.0690571
CTSL2	cathepsin L2	AF070448	210074_at	1.19143	0.00212748	2.46558	0.000140116
HOXA7	homeobox A7	AI492051	235753_at	0.699343	0.000861916	2.4643	0.0138629
CLIC5	chloride intracellular channel 5	BF032808	217628_at	1.02169	0.829468	2.46351	0.000118408
AFAP1L2	actin filament associated protein 1-like 2	AW138743	226829_at	5.5478	0.000940405	2.46299	0.000231601
LOC641518	hypothetical protein LOC641518	AA992805	243363_at	1.2786	0.0517412	1.69384	0.148187
SOX2OT	SOX2 overlapping transcript (non-protein coding)	AW026426	231898_x_at	0.877672	0.353162	2.46206	4.60141e-05
---	---	R97781	241470_x_at	1.21936	0.0125962	1.74745	0.000937866
PLXNA2	plexin A2	NM_025179	207290_at	1.67622	0.106589	1.74988	0.0182626
---	---	AI681914	244104_at	1.32156	0.000949826	1.77685	0.0318389
---	---	AI915629	240137_at	0.950672	0.697206	1.43153	0.0345555
---	---	BF224377	231214_at	1.10989	0.140195	1.88785	0.000173917
STON1	stonin 1	BG434174	213413_at	0.399569	1.6996e-07	2.45909	0.000336162
---	---	AI079944	243172_at	1.54578	0.0181536	1.48546	0.0382495
---	---	BF725383	244845_at	0.903815	0.707744	1.699	0.0398377
PLCE1	phospholipase C, epsilon 1	NM_016341	205112_at	2.00074	0.00604964	1.63992	0.0190959
TIMP3	TIMP metallopeptidase inhibitor 3	U67195	201149_s_at	2.88267	0.154858	2.45774	0.000431536
PDE4D	phosphodiesterase 4D, cAMP-specific (phosphodiesterase E3 dunce homolog, Drosophila)	R40917	204491_at	1.34994	0.0150069	2.45608	0.000110722
---	---	AW903934	232668_at	1.57371	0.0502464	1.72442	0.0195232
EDNRA	endothelin receptor type A	AU118882	204463_s_at	0.617228	0.0049193	1.69374	0.000669
---	---	BF509573	229380_at	3.12342	0.00169593	2.45566	0.000240318
PTCH1	patched homolog 1 (Drosophila)	BC043542	1555520_at	0.641886	0.0192155	2.45527	0.00753129
SEMA3A	sema domain, immunoglobulin domain (Ig), short basic domain, secreted, (semaphorin) 3A	BF102683	244849_at	1.20214	0.0545537	1.53238	3.7198e-05
---	---	BF439728	238317_x_at	0.970502	0.804142	1.78488	0.013193
NRXN1	neurexin 1	AW149405	209914_s_at	1.51067	0.10315	2.45525	0.000129634
KLHL14	kelch-like 14 (Drosophila)	AB037805	228377_at	1.53989	0.0156523	2.45476	0.00412717
LRRN2	leucine rich repeat neuronal 2	AK024867	216167_at	0.793812	0.122893	1.71551	0.0805536
GPR133	G protein-coupled receptor 133	AL162032	232267_at	1.00551	0.958834	1.86911	0.00639834
HOXD9	homeobox D9	AI432470	205604_at	1.33195	0.107488	2.45402	0.000339834
S1PR3	sphingosine-1-phosphate receptor 3	AA534817	228176_at	4.92187	3.24041e-06	2.45326	0.000175421
RAB30	RAB30, member RAS oncogene family	AW294640	228003_at	1.48664	8.40932e-05	2.45175	0.000660087
GNG12	guanine nucleotide binding protein (G protein), gamma 12	BG111761	212294_at	2.6686	4.19262e-06	2.45172	6.74306e-05
hCG_1815491	hCG1815491	AA954994	238022_at	1.06574	0.392807	2.44986	0.000235953
FOXO4	forkhead box O4	NM_005938	205451_at	0.450547	0.0114402	2.44896	0.00419914
SLC5A3	solute carrier family 5 (sodium/myo-inositol cotransporter), member 3	AI867198	213164_at	1.69664	0.00139596	2.44867	5.95009e-05
---	---	BF724178	229613_at	0.862967	0.00620585	2.44847	0.020739
---	---	AK000850	233223_at	1.08832	0.368563	1.56075	0.0146226
ABCC6P1	ATP-binding cassette, sub-family C, member 6 pseudogene 1	AW300488	236205_at	1.16245	0.118749	2.44703	0.00703488
TLE4	transducin-like enhancer of split 4 (E(sp1) homolog, Drosophila)	AL358975	216997_x_at	1.43553	0.0215104	1.74788	0.0202278
CAMK2N1	calcium/calmodulin-dependent protein kinase II inhibitor 1	NM_018584	218309_at	1.75721	4.27511e-05	2.44655	6.22883e-07
NR2F2	nuclear receptor subfamily 2, group F, member 2	AV703465	209119_x_at	1.14011	0.212325	1.7695	0.00495851
ITIH5	inter-alpha (globulin) inhibitor H5	NM_032817	1553243_at	1.94668	0.0014569	1.65928	0.000327295
CAMK2N1	calcium/calmodulin-dependent protein kinase II inhibitor 1	AW162846	228302_x_at	1.37958	0.155513	2.44363	0.000112019
GPER	G protein-coupled estrogen receptor 1	U63917	210640_s_at	1.77107	8.28164e-05	2.43434	1.30203e-05
ADAMTS18	ADAM metallopeptidase with thrombospondin type 1 motif, 18	AI733120	230040_at	1.18119	0.0340088	1.81066	0.00528436
CDKN1C	cyclin-dependent kinase inhibitor 1C (p57, Kip2)	NM_000076	219534_x_at	0.355342	3.30514e-05	2.43369	0.0136089
---	---	AU147152	233180_at	1.28109	0.0268642	1.58668	0.0224496
FGF18	fibroblast growth factor 18	BC006245	211029_x_at	1.25544	0.0796041	1.89711	0.00454538
FANK1	fibronectin type III and ankyrin repeat domains 1	AU143929	232968_at	1.74796	0.0406857	1.71993	0.0285107
HOXD3	homeobox D3	BC005124	206601_s_at	0.888708	0.0584823	1.51275	0.0201546
LOC90246	hypothetical protein LOC90246	AK023635	233835_at	0.788876	0.0173021	1.88717	0.000163505
FLRT2	CDNA FLJ51243 complete cds, highly similar to Leucine-rich repeat transmembrane protein FLRT2 precursor	AI188161	240259_at	5.7018	0.0282279	1.72855	0.0377944
---	---	AW573027	244425_at	1.12929	0.0434035	1.4166	0.00166547
IER5L	immediate early response 5-like	AL555612	226559_at	3.25645	0.000164067	2.43266	0.000472121
ELF4	E74-like factor 4 (ets domain transcription factor)	U32645	31845_at	1.09566	0.230897	2.43112	2.94256e-06
PRG2	plasticity-related gene 2	NM_024888	220798_x_at	0.635668	0.0116944	2.42584	9.52971e-06
ATOH8	atonal homolog 8 (Drosophila)	BF434995	228890_at	1.69021	0.0235112	2.42575	0.000171525
RCAN1	regulator of calcineurin 1	AL049369	215253_s_at	5.11855	0.0609597	2.27944	0.0943872
---	---	AI692499	230596_at	1.03007	0.80805	1.58535	0.00768641
HOXA11AS	HOXA11 antisense RNA (non-protein coding)	AW137133	239950_at	1.06899	0.443372	1.52546	0.01453
WNT6	wingless-type MMTV integration site family, member 6	AY009401	221609_s_at	0.966393	0.74358	1.67657	0.00486739
LY6K	lymphocyte antigen 6 complex, locus K	BC001291	223688_s_at	1.96402	0.00298292	1.69722	0.00409747
GHR	growth hormone receptor	NM_000163	205498_at	3.10603	0.000664795	1.72582	0.00645988
EML1	echinoderm microtubule associated protein like 1	NM_004434	204797_s_at	1.06391	0.222803	2.42345	2.03627e-05
MUSTN1	musculoskeletal, embryonic nuclear protein 1	BF793701	226856_at	1.1974	0.306564	2.42277	0.00349993
ERMN	ermin, ERM-like protein	AA736604	231911_at	1.27888	0.0121443	1.41966	0.0172151
SPON1	spondin 1, extracellular matrix protein	AI885290	213993_at	1.10462	0.345694	2.41587	3.87221e-05
BDH2	3-hydroxybutyrate dehydrogenase, type 2	AW136198	235155_at	0.751073	0.0484885	1.92895	0.0060814
MEIS1	Meis homeobox 1	AL832770	1559477_s_at	5.36064	0.0110643	2.4096	6.22225e-05
CNTN3	contactin 3 (plasmacytoma associated)	BE221817	229831_at	0.63383	0.0375922	1.66291	0.0351726
AGPAT3	1-acylglycerol-3-phosphate O-acyltransferase 3	AI337300	223182_s_at	1.52012	0.0175439	2.40404	9.37227e-05
KLHDC8B	kelch domain containing 8B	AI160540	225755_at	1.18137	0.0530609	2.40377	5.34097e-05
LAYN	layilin	BE856341	228080_at	1.19979	0.0116591	2.40251	2.14819e-05
---	---	BU789637	1557527_at	1.42073	0.0632045	1.44743	0.000275201
COL1A2	collagen, type I, alpha 2	NM_000089	202404_s_at	4.78247	0.0218532	1.69012	0.00121463
C12orf35	chromosome 12 open reading frame 35	AI979334	227152_at	1.37693	0.386595	2.40103	9.89821e-05
GALNAC4S-6ST	B cell RAG associated protein	NM_014863	203066_at	0.912929	0.268349	2.39835	0.00641966
---	---	AK025081	233824_at	0.921271	0.599729	1.94059	0.0105075
ZDHHC8P	zinc finger, DHHC-type containing 8 pseudogene	AW975050	222274_at	1.58558	0.00552697	2.3952	4.31591e-05
SPAG1	sperm associated antigen 1	AF311312	210117_at	4.28459	0.00369305	1.91746	0.00937149
---	---	AA702209	235494_at	1.41851	0.006625	1.82251	0.00180928
FARSB	phenylalanyl-tRNA synthetase, beta subunit	D84430	223036_at	0.860155	0.49688	1.76094	0.00213576
SPAM1	sperm adhesion molecule 1 (PH-20 hyaluronidase, zona pellucida binding)	L13779	216989_at	0.915573	0.0586495	1.58546	0.0997631
FGF3	fibroblast growth factor 3 (murine mammary tumor virus integration site (v-int-2) oncogene homolog)	NM_005247	214571_at	0.914383	0.209792	2.39331	0.00585945
RTN4RL1	reticulon 4 receptor-like 1	H06251	230700_at	0.907601	0.600889	2.23035	0.00782601
SMARCD3	SWI/SNF related, matrix associated, actin dependent regulator of chromatin, subfamily d, member 3	NM_003078	204099_at	1.11178	0.30874	2.39331	1.88838e-05
---	---	AA781173	239307_at	1.1735	0.392889	1.78132	0.0130815
FOLR1	folate receptor 1 (adult)	NM_016725	204437_s_at	0.92871	0.548578	2.3933	0.00144403
COL1A1	collagen, type I, alpha 1	K01228	202310_s_at	1.78876	0.000355422	1.91603	0.0137182
STOX1	storkhead box 1	NM_152709	1553202_at	0.645231	0.00111527	1.79132	0.0348535
---	---	AI916890	240944_at	0.881141	0.307925	2.39302	0.000945662
---	---	AL832835	1562275_at	3.84422	0.0071702	2.39009	0.00871953
LOC286272	hypothetical protein LOC286272	AI142853	232182_at	0.449601	0.00026626	1.9516	0.00331923
LOC440934	(clone z177) retinal mRNA, repeat region	AW473883	244159_at	1.08752	0.526765	2.3877	0.00315926
EDN1	endothelin 1	NM_001955	218995_s_at	2.97468	0.0667105	2.38223	0.0359436
GNG12	guanine nucleotide binding protein (G protein), gamma 12	AF493879	1555240_s_at	1.32441	0.373159	2.37722	0.000243429
MBD2	methyl-CpG binding domain protein 2	AF072242	202484_s_at	3.72027	0.0018381	2.37373	0.00526085
---	---	AI300077	239578_at	1.33404	0.04672	1.58598	0.00473497
TMEM54	transmembrane protein 54	AL545105	225536_at	0.879846	0.209676	2.3717	0.00562962
ANKRD6	ankyrin repeat domain 6	BE677131	204671_s_at	2.59538	0.000121167	2.37108	0.000664325
---	---	BG704082	1556216_s_at	1.0556	0.684088	1.46492	0.0300114
EFNB2	ephrin-B2	U16797	202669_s_at	4.86737	0.0728779	2.37055	0.0242645
COL11A1	collagen, type XI, alpha 1	BG028597	229271_x_at	5.7309	0.0754538	1.40945	0.0224594
ERCC1	excision repair cross-complementing rodent repair deficiency, complementation group 1 (includes overlapping antisense sequence)	BG111047	228131_at	0.799256	0.0628127	1.86669	0.0162178
RUNX3	runt-related transcription factor 3	NM_004350	204197_s_at	1.19438	0.190636	2.37006	0.000263803
TDRD7	tudor domain containing 7	AW129593	213361_at	1.76049	0.010651	2.36945	0.00327972
SH3KBP1	SH3-domain kinase binding protein 1	AW024527	235692_at	2.15455	2.17193e-05	2.36917	0.000273247
DOCK8	dedicator of cytokinesis 8	AL161725	225502_at	2.03017	0.00465777	1.43528	0.0295882
NPPB	natriuretic peptide precursor B	NM_002521	206801_at	18.3561	0.0107717	2.03213	0.0292093
KCNJ2	potassium inwardly-rectifying channel, subfamily J, member 2	AF153820	206765_at	63.0753	0.0114755	1.75528	0.0255762
DNAJC15	DnaJ (Hsp40) homolog, subfamily C, member 15	AI091398	227808_at	1.13932	0.136852	1.52748	0.00526493
MLLT3	myeloid/lymphoid or mixed-lineage leukemia (trithorax homolog, Drosophila); translocated to, 3	AV756536	204917_s_at	1.08086	0.47396	2.36813	0.000197905
---	---	AL049245	1563357_at	1.18781	0.575953	1.67007	0.176671
ABCC6	ATP-binding cassette, sub-family C (CFTR/MRP), member 6	AI074459	215559_at	0.883285	0.261453	2.36772	0.00444975
ABCG1	ATP-binding cassette, sub-family G (WHITE), member 1	NM_004915	204567_s_at	0.696651	0.000769034	2.36048	0.000961481
---	---	H11895	240642_at	1.14664	0.0512856	1.39248	0.0122172
PRR16	proline rich 16	NM_016644	220014_at	1.16878	0.397491	2.1477	0.00567636
SLC6A16	solute carrier family 6, member 16	NM_014037	219820_at	0.841772	0.162955	1.7583	0.00121913
EDN1	endothelin 1	J05008	222802_at	3.05297	0.00839079	2.36003	0.00685191
PDE11A	phosphodiesterase 11A	AI919276	237248_at	0.900164	0.404728	2.35221	0.0153671
---	---	BF508868	240089_at	1.23594	0.00156592	2.34937	1.03016e-05
CNGA3	cyclic nucleotide gated channel alpha 3	NM_001298	207261_at	18.6882	3.30758e-06	1.52289	0.155785
TAGAP	T-cell activation RhoGTPase activating protein	BF591040	229723_at	1.63411	0.00687682	2.34319	0.000351528
AMOTL1	angiomotin like 1	AI433831	225450_at	1.98103	0.000687608	2.34226	8.62747e-05
---	---	AK023515	215627_at	1.28938	0.145018	1.46272	0.00257549
RGL1	ral guanine nucleotide dissociation stimulator-like 1	AF186779	209568_s_at	6.17671	0.00325209	2.34207	2.22076e-05
NMU	neuromedin U	NM_006681	206023_at	0.96478	0.116294	2.34073	0.00147283
CTSZ	cathepsin Z	AF073890	210042_s_at	2.17106	3.50547e-05	2.33881	0.00370974
NRXN1	neurexin 1	AB035356	209915_s_at	1.31912	0.0236579	1.64553	0.0120552
---	---	N63890	235600_at	0.847711	0.315783	1.9882	0.00902167
PDE4DIP	phosphodiesterase 4D interacting protein	AB042557	210305_at	1.62392	0.00856214	1.59718	0.0287916
CLIC5	chloride intracellular channel 5	AW083491	243917_at	0.897992	0.512188	1.79448	0.0161403
CBFA2T3	core-binding factor, runt domain, alpha subunit 2; translocated to, 3	NM_005187	208056_s_at	1.35509	0.180948	2.33719	0.00220875
---	---	BE672541	230768_at	1.94704	0.0161752	1.74649	0.0276093
TRAF5	TNF receptor-associated factor 5	NM_004619	204352_at	0.864985	0.0437459	2.337	0.000143778
GTF2A1L /// STON1 /// STON1-GTF2A1L	general transcription factor IIA, 1-like /// stonin 1 /// STON1-GTF2A1L readthrough transcript	NM_006873	220190_s_at	1.00736	0.942506	1.48158	0.00454773
LYST	lysosomal trafficking regulator	NM_000081	203518_at	6.61312	0.026479	1.54547	0.00144435
GAS7	growth arrest-specific 7	NM_005890	202192_s_at	1.57647	6.61886e-05	2.33503	0.0280237
NHSL1	NHS-like 1	AK025199	234321_x_at	4.06781	8.47769e-05	2.3334	2.87542e-05
hCG_1815491	hCG1815491	AA954994	238021_s_at	1.03377	0.643023	2.33312	5.54065e-05
---	---	BC043430	1558714_at	0.647059	0.0995841	1.94762	0.0293537
---	---	S69873	234907_x_at	1.49617	0.0672858	1.57942	0.0264115
SMAD6	SMAD family member 6	NM_005585	207069_s_at	1.15596	0.110161	2.3309	0.00119104
TAL2	T-cell acute lymphocytic leukemia 2	NM_005421	1553593_a_at	1.26099	0.0672514	2.3288	0.000515413
FZD1	frizzled homolog 1 (Drosophila)	AF072872	204452_s_at	1.34646	0.0119994	1.76091	0.00907019
DAB2	disabled homolog 2, mitogen-responsive phosphoprotein (Drosophila)	BC003064	201279_s_at	6.86419	0.0156795	2.32859	0.00136825
MSX1	CDNA FLJ75656 complete cds, highly similar to Homo sapiens msh homeo box homolog 1 (Drosophila) (MSX1), mRNA	AI421295	228473_at	1.80055	0.0160417	2.3278	0.0489691
TPM1	Alpha-tropomyosin	AI521618	238688_at	0.800791	0.476939	2.3273	0.000522977
PRPF18	HPrp18	AU144329	232473_at	1.88766	0.0215783	1.99509	0.00342941
C1orf105	chromosome 1 open reading frame 105	AL035295	214357_at	1.22478	0.0213935	1.53455	0.0444998
DKK3	dickkopf homolog 3 (Xenopus laevis)	AU148057	214247_s_at	2.05741	0.00104036	2.32422	0.000361574
LMO7	LIM domain 7	AA100793	242722_at	1.08526	0.784474	1.85878	0.00875808
PAQR6	progestin and adipoQ receptor family member VI	NM_024897	219236_at	1.42356	0.0470715	2.32422	0.00242863
CDH7	cadherin 7, type 2	NM_004361	220679_s_at	2.14285	0.103852	1.95207	6.6204e-05
DSP	desmoplakin	NM_004415	200606_at	1.38948	0.0344892	2.32361	0.00761219
---	---	AI424238	235959_at	0.854995	0.382467	1.73348	0.0309162
LCA5	Leber congenital amaurosis 5	AI922939	244401_at	1.99694	0.149212	1.56562	0.000260153
SESN3	sestrin 3	BF685808	235684_s_at	1.43533	0.00180776	1.59698	0.00988218
SAT1	spermidine/spermine N1-acetyltransferase 1	BE971383	213988_s_at	2.79856	0.0124596	2.32277	1.87341e-06
TLE4	transducin-like enhancer of split 4 (E(sp1) homolog, Drosophila)	AA705845	233575_s_at	1.44784	0.0102792	1.65305	0.0309693
YPEL2	yippee-like 2 (Drosophila)	AW005748	229060_at	0.994568	0.908032	1.62606	0.0899858
GDF10	growth differentiation factor 10	NM_004962	206159_at	1.02213	0.821894	1.6044	0.0282281
LOC151878	hypothetical protein LOC151878	AW009761	239965_at	1.02764	0.843477	1.58739	0.00522128
---	---	AI858493	228218_at	2.0983	0.0425303	2.3216	0.0259496
C21orf82	chromosome 21 open reading frame 82	AI423249	237326_at	2.00237	0.00160638	1.64331	4.64778e-05
LNPEP	leucyl/cystinyl aminopeptidase	AW070437	236728_at	0.921863	0.269882	1.43723	0.000241798
GPATCH2	G patch domain containing 2, mRNA (cDNA clone IMAGE:4589911)	BM668595	1556126_s_at	1.10546	0.667455	2.32146	0.00707964
LOC375295	hypothetical gene supported by BC013438	AI569804	228564_at	1.93818	0.00228058	1.66011	0.000804554
CBX4	chromobox homolog 4 (Pc class homolog, Drosophila)	NM_003655	206724_at	1.14583	0.367629	1.64488	0.0423468
EYA2	eyes absent homolog 2 (Drosophila)	U71207	209692_at	0.939978	0.277745	2.31902	2.04992e-05
CASQ2	calsequestrin 2 (cardiac muscle)	NM_001232	207317_s_at	1.64326	0.00870701	1.7326	0.0720704
CDH6	cadherin 6, type 2, K-cadherin (fetal kidney)	NM_004932	205533_s_at	4.514	5.47422e-05	1.70695	0.000611759
---	---	AI983904	221973_at	1.78158	0.0283372	1.52453	0.000575237
COL4A6	collagen, type IV, alpha 6	U04845	211473_s_at	1.12195	0.0263553	2.31611	0.000128001
---	---	AA521056	230180_at	1.82178	0.318968	2.00355	0.0295001
MYLK3	myosin light chain kinase 3	AI376549	238834_at	1.02623	0.73812	2.3122	0.0416805
YPEL5	yippee-like 5 (Drosophila)	NM_016061	217783_s_at	3.49926	0.00493453	2.31211	0.00835366
CLDN10	claudin 10	BE465772	1556687_a_at	1.37247	0.0797107	1.84618	0.0155506
HNMT	histamine N-methyltransferase	AU157303	228772_at	1.98284	0.000509584	1.61701	0.0150008
NR2F2	nuclear receptor subfamily 2, group F, member 2	AI420144	229092_at	0.895744	0.280871	1.44825	0.00209167
---	---	BC021687	1559282_at	0.993694	0.964969	2.31146	0.00169356
SYCP2L	synaptonemal complex protein 2-like	BF590345	236337_at	1.73741	0.024327	1.60849	0.000175067
SRrp35	serine-arginine repressor protein (35 kDa)	AA889416	239295_at	1.09342	0.422285	2.12177	0.0105217
---	---	W90010	238271_x_at	0.782379	0.0142992	1.57615	0.0607519
GNAS	Adenyl cyclase mRNA	AA810695	228173_at	0.788195	0.160866	2.31052	0.00139424
SLC25A34	solute carrier family 25, member 34	AL832282	1559977_a_at	2.11156	0.00402204	2.30697	0.00620996
C4orf19	chromosome 4 open reading frame 19	NM_018302	219450_at	1.37568	0.0320114	1.6416	0.0405133
GUCY1B3	guanylate cyclase 1, soluble, beta 3	W93728	203817_at	0.936752	0.534541	1.68719	0.0423964
FOXL2	forkhead box L2	NM_023067	220102_at	2.36107	0.000321767	2.30676	0.000275762
---	---	AI475680	243509_at	1.15296	0.40946	1.53114	0.0415285
---	---	BC031271	1569785_at	1.20897	0.164464	1.41355	0.0155926
NUB1	NEDD8 ultimate buster-1 (NUB1) mRNA, complete cds; alternatively spliced	AK056624	1559732_at	0.759998	0.0461917	1.72363	0.0032579
LOC401022	hypothetical LOC401022	AW340112	228601_at	0.569253	0.0627986	2.30623	0.00733161
PKNOX2	PBX/knotted 1 homeobox 2	AK023792	222171_s_at	0.570237	0.00202132	2.30599	0.0557337
---	---	BE674309	230913_at	0.909498	0.150797	1.51446	0.018609
TNS1	tensin 1	AL046979	221748_s_at	0.840741	0.111829	1.8384	0.00161891
REPS1	MRNA; cDNA DKFZp667J2119 (from clone DKFZp667J2119)	AW166925	215201_at	0.806502	0.217745	1.78025	0.00123978
ZNF781	zinc finger protein 781	NM_152605	1552785_at	1.07351	0.167811	1.45617	0.00412465
MLLT3	myeloid/lymphoid or mixed-lineage leukemia (trithorax homolog, Drosophila); translocated to, 3	NM_004529	204918_s_at	0.975143	0.762602	2.30159	0.000298699
---	---	AI936516	235735_at	0.983038	0.556987	1.48186	0.0148031
CAPN9	calpain 9	NM_006615	208063_s_at	0.837061	0.111161	1.74451	0.0140033
AZU1	azurocidin 1	NM_001700	214575_s_at	0.972905	0.843182	1.66024	0.00361927
---	---	AI955713	227193_at	1.19483	0.166417	1.529	0.00104434
C13orf31	chromosome 13 open reading frame 31	AI659800	228937_at	5.75122	0.000540295	1.54131	0.0907609
---	---	AK022804	231890_at	1.65781	0.0082251	2.3009	2.04633e-05
---	---	AL120332	231980_at	0.858464	0.0470568	1.48325	0.00806121
---	---	BE674006	227663_at	1.08142	0.463605	2.10339	0.011731
C10orf10	chromosome 10 open reading frame 10	AL136653	209183_s_at	0.847818	0.090531	1.98601	0.00323934
LHFP	MRNA; cDNA DKFZp434N0526 (from clone DKFZp434N0526)	BE674089	231411_at	2.84367	0.0820553	1.91032	0.00739892
PLCE1	phospholipase C, epsilon 1	NM_016341	205111_s_at	1.7694	0.00184147	2.30024	0.00050862
KIAA0895	KIAA0895	AB020702	213424_at	1.34298	0.0747856	2.30008	0.00316648
---	---	BM682057	1557224_at	0.956341	0.714463	1.71443	0.00156453
LOC203274	CDNA FLJ31544 fis, clone NT2RI2000865	AL117607	232034_at	2.32971	0.00288073	2.1911	0.00573614
LOC255480	hypothetical protein LOC255480	U47671	233947_s_at	0.922045	0.583155	1.78824	0.00787569
ESRRG	estrogen-related receptor gamma	NM_001438	207981_s_at	0.651311	0.00409817	2.29927	0.000330662
LOC692247	hypothetical locus LOC692247	BG772667	1569453_a_at	0.721429	0.0155271	1.95386	0.0107291
C6orf122	chromosome 6 open reading frame 122	AK056013	1561327_at	1.00423	0.892716	1.60008	0.0155694
C12orf35	chromosome 12 open reading frame 35	NM_018169	218614_at	1.60847	0.0001234	2.29132	5.60045e-05
SPSB1	splA/ryanodine receptor domain and SOCS box containing 1	AF131840	226075_at	1.45447	0.0513068	1.87091	0.0144738
---	---	AA355403	239465_at	1.39292	0.00337989	1.50407	0.112622
PLAC2	placenta-specific 2 (non-protein coding)	AI743780	229385_s_at	1.69758	0.000176982	2.29071	0.0164955
LOC100134363 /// LOC100134366 /// PLGLA /// PLGLB1 /// PLGLB2	hypothetical protein LOC100134363 /// hypothetical protein LOC100134366 /// plasminogen-like A /// plasminogen-like B1 /// plasminogen-like B2	BC005379	205871_at	1.83333	0.0170581	1.61	0.0109203
FLJ90757	hypothetical protein LOC440465	AK096609	1566557_at	0.683618	0.000412718	2.28912	0.000190857
---	---	AU147809	233365_at	0.993508	0.90996	1.48153	0.0291092
TAL2	T-cell acute lymphocytic leukemia 2	NM_005421	231759_at	1.54149	0.0263924	1.9456	0.00801153
LOC284219	hypothetical protein LOC284219	BF509747	1556425_a_at	2.73396	0.00284458	1.75717	0.00199977
SCML4	sex comb on midleg-like 4 (Drosophila)	BC021582	1569225_a_at	1.07723	0.215291	1.42869	0.00843089
SV2C	synaptic vesicle glycoprotein 2C	AB028977	216086_at	1.18241	0.0584824	1.97222	0.00111055
ZNF710	zinc finger protein 710	AI671257	239700_at	1.35777	0.0547525	1.70099	0.000503333
SPON1	spondin 1, extracellular matrix protein	AB018305	209436_at	0.972344	0.657504	2.28823	0.000417735
---	---	AL390170	213904_at	0.924656	0.233116	1.9748	0.00939694
HOXA10	homeobox A10	BF792917	213150_at	1.045	0.609345	2.28723	0.0012698
---	---	AK022063	215360_at	0.988539	0.89739	1.39632	0.00166076
LOC650392	CDNA clone IMAGE:5264670	BE464483	227984_at	0.483327	0.00130499	1.92454	0.0129743
RHOC	Full length insert cDNA clone YP95A10	AI436197	235742_at	1.79289	0.0200765	1.94893	0.00650066
PRRX2	paired related homeobox 2	NM_016307	219729_at	0.600097	0.00174945	2.28589	0.000759133
LOC100130502	hypothetical LOC100130502	AI368807	244744_at	0.705426	0.000112064	1.9974	0.000425138
LOC100170939	glucuronidase, beta pseudogene	X75940	214850_at	1.37539	0.113778	1.82603	0.00420692
---	---	AA431379	239944_at	2.04897	0.011649	2.28446	0.00134777
TNRC18	trinucleotide repeat containing 18	AI625045	229257_at	1.43788	0.0221582	1.96352	0.00316061
NFE2	nuclear factor (erythroid-derived 2), 45kDa	L13974	209930_s_at	1.16675	0.202467	2.27922	0.000290787
C12orf34	chromosome 12 open reading frame 34	BE551088	226487_at	1.38339	0.0428895	2.27675	0.00560632
GABRP	gamma-aminobutyric acid (GABA) A receptor, pi	NM_014211	205044_at	0.936573	0.195777	1.6633	0.137308
---	---	U90905	1556055_at	0.787239	0.328088	1.54625	0.0643689
---	---	NM_024972	220898_at	1.29876	0.0405913	1.38372	0.0209345
---	---	AK021554	232307_at	0.725209	0.2254	1.86678	0.0453809
LOC100131897	Uncharacterized protein LOC100131897 (LOC100131897), mRNA	AI991459	235236_at	2.34934	0.00202779	1.36729	0.0733607
STOM	stomatin	AI537887	201060_x_at	1.22594	0.072541	2.27576	0.00342423
FSCN1	fascin homolog 1, actin-bundling protein (Strongylocentrotus purpuratus)	NM_003088	201564_s_at	1.569	0.0180125	2.27391	0.000795262
DSEL	dermatan sulfate epimerase-like	AK021539	232235_at	2.78326	0.00403788	1.78506	0.00146444
---	---	AW102716	237329_at	4.80932	0.000119759	1.85637	0.00911619
---	---	AI912571	228333_at	1.96041	0.0548416	1.80303	0.0363396
FMNL3	formin-like 3	AA481044	238823_at	1.66899	0.0156918	1.51566	0.0182009
RBM20	RNA binding motif protein 20	AI539118	238763_at	4.19739	0.000263767	1.54531	0.0122199
---	---	AF339820	1559259_at	0.668667	0.0348463	1.74497	0.00222668
---	---	AW473656	242054_s_at	0.799965	0.00373652	2.27342	0.0230543
RNF152	ring finger protein 152	NM_173557	1553722_s_at	1.2231	0.141424	1.30252	0.0716908
ARRDC4	arrestin domain containing 4	AV701177	225283_at	7.54254	0.00566495	1.8622	0.00191981
C7orf44	CDNA: FLJ21208 fis, clone COL00363	AK024861	232330_at	1.74458	0.0248488	1.50485	0.00483605
PHC2	polyhomeotic homolog 2 (Drosophila)	NM_004427	200919_at	3.81547	4.63295e-05	2.27271	0.0005321
---	---	AW292765	235251_at	1.45091	0.00590628	1.54791	0.00737482
---	---	BE326808	227497_at	1.0498	0.742551	1.66432	0.0114728
LOC389328	hypothetical LOC389328	BU845700	1569561_at	1.03493	0.263277	1.62781	0.0151497
DACH1	dachshund homolog 1 (Drosophila)	NM_004392	205472_s_at	1.41274	0.104583	2.26872	0.028399
BMPER	BMP binding endothelial regulator	AI423201	241986_at	1.40956	0.00187241	1.40442	0.105112
---	---	AW974657	240877_x_at	1.41364	0.028559	1.63542	0.14758
NAALAD2	N-acetylated alpha-linked acidic dipeptidase 2	BC038840	1554504_at	1.07168	0.372397	1.31316	0.0754194
---	---	AK022083	232354_at	1.00464	0.921235	1.45357	0.16273
---	---	NM_018611	220666_at	1.03824	0.659647	1.39764	0.0290958
CACNB3	calcium channel, voltage-dependent, beta 3 subunit	U07139	34726_at	0.782568	0.00763716	2.26868	0.00214323
NOV	nephroblastoma overexpressed gene	BF440025	214321_at	2.61898	0.00363064	1.33506	0.030211
COL5A1	collagen, type V, alpha 1	AI983428	212489_at	2.57769	4.12644e-05	1.93116	0.0116043
---	---	AW665447	230113_at	1.07602	0.277533	1.52867	0.0155197
FGF18	Fibroblast growth factor 18, mRNA (cDNA clone MGC:10529 IMAGE:3948893)	AI798863	231382_at	1.38177	0.00495502	2.26745	0.00236156
GABRE	gamma-aminobutyric acid (GABA) A receptor, epsilon	NM_004961	204537_s_at	1.69129	0.0350077	2.26533	0.00064453
HOXC9	homeobox C9	AK000445	231936_at	1.0757	0.330019	1.36863	0.0552393
---	---	AI190306	235841_at	0.997129	0.972246	1.33676	0.0242163
MLLT6	myeloid/lymphoid or mixed-lineage leukemia (trithorax homolog, Drosophila); translocated to, 6	BG024886	224784_at	0.622806	0.0256576	2.0739	0.0130319
PCDH7	protocadherin 7	NM_002589	205535_s_at	2.29835	0.023967	1.70628	0.00263948
IKZF2	IKAROS family zinc finger 2 (Helios)	AI458439	231929_at	0.675224	0.0167834	1.63034	0.0703434
NFASC	neurofascin homolog (chicken)	AA995925	213438_at	2.70986	0.00121554	1.8072	0.00645279
NTRK2	neurotrophic tyrosine kinase, receptor, type 2	AA707199	221796_at	3.89736	0.0128585	1.41081	0.0703305
MLLT3	myeloid/lymphoid or mixed-lineage leukemia (trithorax homolog, Drosophila); translocated to, 3	BC030550	1569652_at	1.08794	0.190829	1.45697	0.0500916
DLX1	distal-less homeobox 1	BF060783	242138_at	1.88019	0.00306654	2.2651	0.000731675
KCTD1	potassium channel tetramerisation domain containing 1	AA199881	226245_at	1.17036	0.0477819	2.26492	0.00031213
CDON	Cdon homolog (mouse)	AU151222	227526_at	0.459346	0.000907059	2.26133	0.00102135
---	---	AL041381	1559037_a_at	0.99226	0.942585	1.74391	0.00482829
LOC387647	patched domain containing 3 pseudogene	AW118878	230737_s_at	1.42116	0.0722153	1.55282	0.0375716
---	---	AW979271	244387_at	0.993239	0.951753	1.38965	0.0180504
PAX6	paired box 6	NM_000280	205646_s_at	0.905194	0.294485	1.86554	0.00794292
PTRF	polymerase I and transcript release factor	BC004295	208789_at	5.17319	2.71298e-05	2.26123	7.91208e-05
---	---	AW025980	241864_x_at	0.906294	0.0655584	1.91283	0.000288965
---	---	AU155494	234074_at	1.00922	0.960315	1.90237	0.0125889
FGF9	fibroblast growth factor 9 (glia-activating factor)	AL583692	239178_at	1.06734	0.383626	1.34943	0.0612985
CRTC3	FLJ00364 protein	AK024981	232879_at	0.846994	0.213914	1.48798	0.0054222
---	---	AW292329	242932_at	0.975075	0.86001	1.81701	0.0338482
---	---	AI696621	243704_at	1.70582	0.00509548	1.73575	0.000559255
TRIM73 /// TRIM74	tripartite motif-containing 73 /// tripartite motif-containing 74	BC033871	1554182_at	0.835502	0.00543983	1.426	0.00934938
SAT1	spermidine/spermine N1-acetyltransferase 1	NM_002970	203455_s_at	3.82779	0.0101334	2.26065	1.02534e-05
LOC100130275	hypothetical protein LOC100130275	AK092393	1560503_a_at	1.08621	0.280286	1.69749	0.022596
CYS1	cystin 1	AI139413	228739_at	1.22353	0.0028782	1.57589	0.000149516
DOCK10	dedicator of cytokinesis 10	NM_017718	219279_at	1.86405	0.000301323	1.91877	5.48901e-05
---	---	AW975051	238883_at	0.72153	0.0744205	1.94618	0.0151317
AFF3	AF4/FMR2 family, member 3	AW085505	227198_at	2.88065	0.00212535	1.87102	0.0153293
WNT5B	wingless-type MMTV integration site family, member 5B	AW007350	223537_s_at	1.33713	0.0197635	2.09675	0.0500303
ZBTB7C	zinc finger and BTB domain containing 7C	AI278995	227782_at	1.60119	0.0042482	1.86766	0.00091519
VWA5A	von Willebrand factor A domain containing 5A	NM_014622	205011_at	1.83228	0.000500706	2.26059	0.0125749
TRIM62	tripartite motif-containing 62	NM_018207	219272_at	1.02825	0.679322	2.25925	0.000193215
---	---	AU145206	233417_at	0.811969	0.195862	1.72325	0.0645614
---	---	AL122040	232429_at	1.06389	0.450997	1.3293	0.0300711
TNNC1	troponin C type 1 (slow)	AF020769	209904_at	0.97196	0.809761	1.82403	0.00146911
BMF	Bcl2 modifying factor	AK024472	226530_at	2.20098	0.00116211	2.25674	0.000650125
SRrp35	serine-arginine repressor protein (35 kDa)	NM_080743	1552381_at	1.41449	0.0062984	2.25403	4.73712e-05
---	---	AI093722	226377_at	0.60506	0.00032367	2.25278	0.0145203
NCRNA00092	non-protein coding RNA 92	BC043559	1562733_at	1.00713	0.958588	2.24777	0.00855278
ZFPM2	zinc finger protein, multitype 2	NM_012082	219778_at	0.939137	0.17681	1.52595	0.0929532
PDLIM7	CDNA clone IMAGE:4763486	BC023629	1569149_at	0.91242	0.509387	2.24531	0.00167492
---	---	AI309481	1558890_at	0.782081	0.00879935	1.86237	0.00625675
HOXD13	homeobox D13	NM_000523	207398_at	1.54898	0.166899	1.86226	0.0892433
CDK6	cyclin-dependent kinase 6	AW051349	224847_at	1.6161	0.00125141	2.24473	9.28014e-05
SYTL5	synaptotagmin-like 5	AW263497	242093_at	10.2081	0.00352813	2.24423	0.000455162
LOC283663	hypothetical LOC283663	AI926479	230245_s_at	1.30142	0.101118	2.24181	4.30337e-05
SYCP2	synaptonemal complex protein 2	NM_014258	206546_at	0.981651	0.707721	1.42865	0.062333
---	---	BE348304	237554_at	0.973279	0.76858	1.43951	0.00598845
GAD1	glutamate decarboxylase 1 (brain, 67kDa)	NM_013445	206669_at	2.71998	0.000676807	2.23776	0.000169127
---	---	BU676221	1555976_s_at	1.61618	0.0269087	1.52931	0.0342658
ATP1A4	ATPase, Na+/K+ transporting, alpha 4 polypeptide	AK098076	1564241_at	1.09144	0.254813	1.6368	0.0253048
ANXA3	annexin A3	M63310	209369_at	6.77059	0.000477221	2.06141	0.0328242
SLC44A1	solute carrier family 44, member 1	AV721564	227620_at	1.78242	0.00315098	2.23668	0.000662516
MUC20	mucin 20, cell surface associated	AB037780	231941_s_at	2.16286	0.00813722	1.35634	0.0227578
DAB2	disabled homolog 2, mitogen-responsive phosphoprotein (Drosophila)	AF188298	210757_x_at	6.55628	0.0161015	2.23649	0.000430246
MGAT3	mannosyl (beta-1,4-)-glycoprotein beta-1,4-N-acetylglucosaminyltransferase	AL022312	209764_at	0.89757	0.0457945	2.44454	0.0563797
---	---	AA651631	243561_at	0.651783	0.0625336	2.23648	0.00751623
TP53INP2	tumor protein p53 inducible nuclear protein 2	AL109824	224836_at	1.56456	0.000792338	2.23127	0.00213062
---	---	AK025143	215206_at	1.12797	0.428348	1.67893	0.0057628
SAMD11	sterile alpha motif domain containing 11	AK054643	1560477_a_at	0.371488	0.000111768	2.231	0.000168662
CAV2	caveolin 2	BF197655	203323_at	16.211	0.0132398	1.78029	0.0047648
---	---	N50714	236038_at	0.855084	0.205511	1.65044	0.0661547
PIK3R3	phosphoinositide-3-kinase, regulatory subunit 3 (gamma)	BE622627	202743_at	1.3705	0.00167373	2.2282	0.000225369
EGR1	early growth response 1	NM_001964	201694_s_at	1.12368	0.270026	2.41312	0.0107236
EBF2	early B-cell factor 2	AK001144	1562477_at	1.19774	0.0470036	2.22715	0.00205013
---	---	AW451645	232805_at	12.6274	0.00371894	2.22636	0.00321717
LOC284475	hypothetical protein LOC284475	AI628583	240661_at	1.10021	0.182165	1.45358	0.0420628
---	---	H78106	235428_at	0.814673	0.103188	1.48786	0.0186532
CDK6	cyclin-dependent kinase 6	AA922068	224848_at	1.4744	0.0994463	2.22564	0.0410974
ANO4	anoctamin 4	AI949760	229749_at	4.55527	5.70125e-05	2.22509	0.00143934
GAD1	glutamate decarboxylase 1 (brain, 67kDa)	NM_013445	206670_s_at	2.90166	0.00542828	2.22417	0.00438389
MGAT4A	mannosyl (alpha-1,3-)-glycoprotein beta-1,4-N-acetylglucosaminyltransferase, isozyme A	AW006441	226039_at	0.410519	0.000961042	1.86258	0.0454845
RGS4	regulator of G-protein signaling 4	AL514445	204337_at	16.6273	1.46007e-05	2.22371	0.00166395
---	---	AA651772	244662_at	0.975837	0.71725	1.57036	0.00790308
---	---	AI810803	244174_at	1.16576	0.205687	1.58265	0.0170253
---	---	AW962458	241769_at	1.60491	0.311945	1.95021	0.0025343
AGPAT3	1-acylglycerol-3-phosphate O-acyltransferase 3	AI928403	223183_at	1.89135	5.95707e-05	2.22209	0.00278305
MAP3K8	mitogen-activated protein kinase kinase kinase 8	NM_005204	205027_s_at	2.46921	0.00340996	1.69709	0.00615034
PTRF	polymerase I and transcript release factor	AF312393	208790_s_at	5.85926	0.056453	2.22147	0.000921949
STOX1	storkhead box 1	N53051	229378_at	0.503515	0.000303593	1.72046	0.000382305
---	---	AA760738	229483_at	1.17418	0.482269	2.22038	0.00129191
LYPD6	LY6/PLAUR domain containing 6	BF061375	227763_at	0.983591	0.89368	1.75198	0.0132446
NSUN6	NOL1/NOP2/Sun domain family, member 6	U80764	222128_at	0.929524	0.413084	1.68623	0.0154674
GAS7	growth arrest-specific 7	BE439987	202191_s_at	1.37334	0.25782	2.21989	0.000365818
---	---	AW953150	235111_at	1.2225	0.202126	1.59819	0.00827466
---	---	AF086069	1556989_at	1.48283	0.0208934	2.21747	0.000994874
---	---	BF196234	243440_at	1.08545	0.441484	1.53477	0.00637333
---	---	AA743122	244458_at	0.985568	0.925441	1.90411	0.0056616
CAMK2N1	calcium/calmodulin-dependent protein kinase II inhibitor 1	N75559	229163_at	1.58826	0.163257	1.67035	0.0339665
---	---	NM_016415	208187_s_at	1.12513	0.400967	1.4344	0.114966
GALNT6	UDP-N-acetyl-alpha-D-galactosamine:polypeptide N-acetylgalactosaminyltransferase 6 (GalNAc-T6)	AW014155	228303_at	2.03725	9.94937e-05	2.21619	0.00107634
---	---	AA883831	244042_x_at	0.788683	0.348773	1.82086	0.021744
---	---	AK025101	1564378_a_at	0.864857	0.364025	1.6156	0.0530706
---	---	BC017945	1559709_at	0.898343	0.215494	1.36997	0.0136281
REEP1	receptor accessory protein 1	BE535746	204364_s_at	0.522542	0.00127915	1.89293	0.006298
TMED4	transmembrane emp24 protein transport domain containing 4	BC001576	1558053_s_at	1.02149	0.847712	1.67134	0.0085162
SHB	Src homology 2 domain containing adaptor protein B	BU685917	1557458_s_at	1.64146	0.000653967	2.21556	9.32173e-05
ZHX1	zinc fingers and homeoboxes 1	AI123518	223213_s_at	2.87807	0.00068627	1.72743	0.000419273
FN1	fibronectin 1	W73431	1558199_at	1.33487	0.0702116	2.21119	0.00471991
EFEMP2	EGF-containing fibulin-like extracellular matrix protein 2	NM_016938	206580_s_at	1.08067	0.574023	2.21097	0.00212411
JUB	jub, ajuba homolog (Xenopus laevis)	AK025567	225807_at	0.84802	0.106556	1.59652	0.0441697
KLF5	Kruppel-like factor 5 (intestinal)	AB030824	209212_s_at	3.3571	0.0608667	2.21078	0.00348
RHBDL3	rhomboid, veinlet-like 3 (Drosophila)	AI692483	230755_at	0.323709	7.43138e-05	2.21011	1.03258e-05
---	---	AW972380	236520_at	0.7042	0.0319476	1.50556	0.0229854
VPS53	vacuolar protein sorting 53 homolog (S. cerevisiae)	BF115777	235882_at	1.97282	0.00577753	1.58274	0.00289075
HNRNPM	heterogeneous nuclear ribonucleoprotein M	AK024911	214918_at	0.774594	0.00203878	1.84828	0.109932
WFIKKN1	WAP, follistatin/kazal, immunoglobulin, kunitz and netrin domain containing 1	NM_053284	1552811_at	0.805688	0.0930539	2.20862	0.00802899
IFIT5	interferon-induced protein with tetratricopeptide repeats 5	N47725	203595_s_at	1.06686	0.692089	1.88371	0.00831275
---	---	AL832672	1557543_at	0.994826	0.983763	1.5476	0.176875
CCNG2	cyclin G2	BF061444	228081_at	1.44789	0.0233845	1.77018	0.00723507
---	---	AU146197	232711_at	0.769653	0.0195122	1.52514	0.000117792
GALNTL1	UDP-N-acetyl-alpha-D-galactosamine:polypeptide N-acetylgalactosaminyltransferase-like 1	AI097463	230418_s_at	0.748935	0.0452044	2.20847	0.00206682
LOC643837	hypothetical LOC643837	AL079648	235497_at	1.4532	0.00780802	2.20627	0.000119909
UBE2J1	ubiquitin-conjugating enzyme E2, J1 (UBC6 homolog, yeast)	AW500009	217824_at	2.88905	0.000135842	2.20487	0.00100106
DKFZP434L187	CDNA clone IMAGE:5022014	BC033224	1569476_at	0.733823	0.183097	1.83056	0.0278646
DKK3	dickkopf homolog 3 (Xenopus laevis)	AL569601	230508_at	2.41825	6.62648e-06	2.2026	1.55763e-05
LOC100130417	similar to hCG1995469	CA447406	1555980_a_at	0.76188	0.0615547	2.19937	0.00019604
DNHD1	dynein heavy chain domain 1	AL040892	229631_at	1.39148	0.00725631	1.80773	0.0427697
LOC729085	hypothetical protein LOC729085	AL117530	232124_at	0.952177	0.636645	1.56334	0.0602059
KIAA0513	KIAA0513	NM_014732	204546_at	0.58619	0.000117442	2.19926	7.04964e-05
AMOTL1	angiomotin like 1	AU157155	225459_at	2.90018	5.71887e-05	2.19709	0.00301627
HOXB8	homeobox B8	AI277015	229667_s_at	0.979074	0.423819	1.39437	0.123388
HSPA12B	heat shock 70kD protein 12B	AI150641	229172_at	0.731746	0.047905	1.8679	0.0161609
MOXD1	monooxygenase, DBH-like 1	BC018756	1554474_a_at	1.61237	0.00200298	1.84394	0.01638
SEZ6L	seizure related 6 homolog (mouse)-like	AW204757	240709_at	0.929575	0.553795	1.38668	0.0251768
LAMB2	laminin, beta 2 (laminin S)	X79683	216264_s_at	1.36852	0.00278144	2.19637	0.0219264
COL4A6	collagen, type IV, alpha 6	BC005305	210945_at	0.639461	6.5185e-08	2.19568	0.0126391
POLR3B	polymerase (RNA) III (DNA directed) polypeptide B	BC033542	1556804_s_at	1.10395	0.259538	1.32403	0.014717
---	---	BC016339	1559332_at	0.765247	0.178505	1.67876	0.0102775
---	---	AA480392	232174_at	1.37696	0.259085	2.19428	0.0139409
---	---	BF445178	237110_at	1.0067	0.948918	1.72732	0.0291941
C9orf130	chromosome 9 open reading frame 130	AL389954	1557788_a_at	0.718721	0.0304799	1.76554	0.00695319
YPEL5	yippee-like 5 (Drosophila)	BC000836	222408_s_at	3.85567	0.00931123	2.19406	0.0147983
LOC27320 /// TNRC18	hypothetical protein LOC27320 /// trinucleotide repeat containing 18	AI936523	226691_at	1.25236	0.0185764	2.19283	0.0011836
RARB	retinoic acid receptor, beta	NM_000965	205080_at	1.62381	0.00499296	1.59865	0.0373992
---	---	H98113	230733_at	1.14572	0.349723	2.1906	0.0207506
KIAA1772	KIAA1772	NM_024935	220340_at	0.775222	0.119225	1.605	0.0242907
SEMA3E	sema domain, immunoglobulin domain (Ig), short basic domain, secreted, (semaphorin) 3E	NM_012431	206941_x_at	1.25471	0.144451	1.36294	0.0565714
CADM1	cell adhesion molecule 1	AL519710	209031_at	1.34757	0.000721723	2.19046	0.0091004
TRIM55	tripartite motif-containing 55	AW663544	236175_at	3.63705	0.0156108	2.18784	8.69069e-05
---	---	H24473	229951_x_at	1.12376	0.163685	1.29963	0.032952
---	---	AI695695	242051_at	1.81992	0.0298398	2.18751	0.00509256
SLC7A10	solute carrier family 7, (neutral amino acid transporter, y+ system) member 10	NM_017965	220868_s_at	0.847147	0.0301456	1.58062	0.0169406
ANKRD18A	ankyrin repeat domain 18A	AI806762	244297_at	1.75635	0.019342	2.18713	0.000773043
SEMA3A	sema domain, immunoglobulin domain (Ig), short basic domain, secreted, (semaphorin) 3A	NM_006080	206805_at	2.23533	0.0628049	2.18652	0.000317987
---	---	AW340457	239291_at	1.1569	0.142148	1.35156	0.0523988
TIMP3	TIMP metallopeptidase inhibitor 3	BF347089	201147_s_at	5.11037	0.036413	1.83454	0.000229155
---	---	AU144382	232947_at	1.07591	0.42816	1.40062	0.017908
SMYD2	SET and MYND domain containing 2	AF070592	212921_at	2.03725	0.00526915	1.59936	0.0218138
PAX2	paired box 2	AW769732	206228_at	0.954839	0.723901	1.59575	0.0017335
---	---	AF339768	232369_at	2.11057	0.00255063	1.59368	0.0290645
PDGFC	platelet derived growth factor C	NM_016205	218718_at	3.05211	0.000427604	2.18604	0.000765714
FZD1	frizzled homolog 1 (Drosophila)	NM_003505	204451_at	0.963998	0.56444	2.18535	0.000209981
GPR161	G protein-coupled receptor 161	AI743151	230369_at	1.13514	0.0173384	2.18253	0.000344162
SLC12A5	solute carrier family 12 (potassium-chloride transporter), member 5	AF208159	210040_at	1.07672	0.322505	1.39508	0.0293549
UCN2	urocortin 2	BC002647	232674_at	2.05712	0.0179118	1.72	0.00153321
SLC44A1	solute carrier family 44, member 1	AW971205	222364_at	1.13288	0.589454	1.77951	0.00166006
YPEL2	yippee-like 2 (Drosophila)	BE502982	227020_at	1.0841	0.57737	1.96637	0.00190356
MAGEL2	MAGE-like 2	NM_019066	219894_at	1.74068	0.000215166	2.17998	0.00186432
MXI1	MAX interactor 1	NM_005962	202364_at	0.852324	0.000271147	2.1795	0.00560665
FAM19A2	family with sequence similarity 19 (chemokine (C-C motif)-like), member A2	AI142028	241399_at	4.43582	2.74676e-05	1.75456	0.00092105
---	---	AL359062	226237_at	18.5344	0.00116442	1.46026	0.00948618
WNT3	wingless-type MMTV integration site family, member 3	NM_030753	221455_s_at	1.48079	0.114311	1.75014	0.032357
---	---	AL566294	236699_at	1.73683	0.0543503	1.49528	0.0210041
SCN3B	sodium channel, voltage-gated, type III, beta	AB032984	204723_at	8.16922	1.72063e-05	1.54685	0.0195067
LY6H	lymphocyte antigen 6 complex, locus H	NM_002347	206773_at	0.722389	0.060039	1.73814	0.00390744
---	---	AW003011	240580_at	1.05159	0.443489	1.36049	0.0255199
CDKN2C	cyclin-dependent kinase inhibitor 2C (p18, inhibits CDK4)	U17074	211792_s_at	1.07256	0.147754	2.17565	0.0378824
---	---	AA811657	243303_at	0.900661	0.310986	1.63528	0.0395292
EML4	echinoderm microtubule associated protein like 4	AA524507	228674_s_at	1.36892	0.140391	2.17457	0.000300948
ATG9B	ATG9 autophagy related 9 homolog B (S. cerevisiae)	AI827483	229252_at	0.968896	0.798982	1.72264	0.0346815
TFAP2C	transcription factor AP-2 gamma (activating enhancer binding protein 2 gamma)	NM_003222	205287_s_at	2.36207	0.00148369	2.11703	0.0430644
---	---	AA947873	240467_at	1.05395	0.496643	2.17307	0.000837206
ATP8B3	ATPase, class I, type 8B, member 3	AA905217	239457_at	0.786482	0.00834784	1.78832	0.00558389
---	---	AI922972	236619_at	0.819573	0.123948	1.50763	0.00192882
ZNF608	zinc finger protein 608	AB033107	232303_at	0.891092	0.513999	1.7812	0.00214937
PPFIA4	protein tyrosine phosphatase, receptor type, f polypeptide (PTPRF), interacting protein (liprin), alpha 4	AK023365	214978_s_at	0.796744	0.00757059	1.67501	0.000178745
---	---	N78412	242899_at	1.25258	0.278847	1.42002	0.0192853
WDR86	WD repeat domain 86	AI968904	243526_at	0.60116	0.0115838	1.9835	0.0378723
PLA2R1	phospholipase A2 receptor 1, 180kDa	BE048919	235746_s_at	1.51696	0.0398853	1.35141	0.0365881
FLRT3	fibronectin leucine rich transmembrane protein 3	N71923	222853_at	3.70132	5.20046e-06	2.17198	0.00658693
---	---	AI040744	242664_at	1.2253	0.0662626	1.3101	0.0764665
---	---	AW575863	243780_at	0.719223	0.0165806	1.78629	0.00879918
TIMP3	TIMP metallopeptidase inhibitor 3	NM_000362	201150_s_at	4.25047	0.0271476	2.16973	0.000696642
LOC440944	hypothetical gene supported by AK128398	BC036698	1557357_at	1.05492	0.701256	1.42407	0.0447822
RHOC	ras homolog gene family, member C	NM_005167	200885_at	3.56114	0.00325382	2.16846	2.53703e-05
---	---	BF056369	229670_at	0.986374	0.908815	1.50379	0.0128714
ANKRD36B	ankyrin repeat domain 36B	NM_025190	220940_at	1.29787	0.335949	1.85406	0.00800071
MICAL2	microtubule associated monoxygenase, calponin and LIM domain containing 2	BE965029	212473_s_at	5.22635	0.00057592	1.64425	0.00637265
---	---	BE501559	230456_at	0.979243	0.862469	1.75646	0.00391103
PLAC8	placenta-specific 8	NM_016619	219014_at	4.91376	0.000339139	1.74506	0.00127227
ZNF467	zinc finger protein 467	BE549732	214746_s_at	0.601081	0.00072454	1.94161	0.0064941
---	---	AU146021	232478_at	1.01948	0.79034	1.51264	0.00374704
---	---	BE463978	237611_at	0.865759	0.224273	1.98618	0.00203326
---	---	NM_018678	220494_s_at	1.08685	0.54561	2.16783	0.0110227
---	---	AU146390	233276_at	0.829839	0.315225	1.74414	0.0357572
---	---	AA521080	243824_at	1.3717	0.0762303	1.73051	0.00810571
CPZ	carboxypeptidase Z	BC006393	211062_s_at	1.51869	0.000867043	2.16777	5.00426e-05
ASXL1	additional sex combs like 1 (Drosophila)	AI819150	242438_at	1.06326	0.603472	1.80815	0.000472996
SFRS3	Pre-mRNA splicing factor SRp20, 5'UTR region	BE927772	232392_at	1.29206	0.174575	1.65706	0.0295952
NRXN3	neurexin 3	NM_004796	205795_at	0.875882	0.0178864	2.16751	0.0181976
LOC100132077	hypothetical protein LOC100132077	AK095188	1559514_at	1.03735	0.540194	1.39992	0.101607
EVI1	ecotropic viral integration site 1	BE466525	221884_at	1.77344	0.0316997	2.1661	0.0134162
WNT8A	wingless-type MMTV integration site family, member 8A	AY009402	224259_at	0.856311	0.00949764	1.68636	0.0753209
---	---	AU144328	233262_at	0.79586	0.083154	1.39301	0.0491635
SEPP1	selenoprotein P, plasma, 1	NM_005410	201427_s_at	0.529184	0.0011662	2.16468	6.14003e-05
---	---	BC033667	1568639_a_at	1.13857	0.295526	1.72588	0.00537972
AP4B1	adaptor-related protein complex 4, beta 1 subunit	AW072594	231962_at	1.55413	0.0248395	1.37276	0.00472681
FGD6	FYVE, RhoGEF and PH domain containing 6	BC013319	1555136_at	1.11454	0.23721	1.5924	0.0148734
CTSO	cathepsin O	AV729484	203758_at	1.05676	0.611069	1.62881	0.0748245
FLJ37644 /// LOC727973	hypothetical gene supported by AK094963 /// hypothetical protein LOC727973	AA778530	230419_at	2.37006	0.000905441	2.16439	0.000182896
TSPAN2	tetraspanin 2	AU147132	227233_at	2.60105	0.0310127	1.46532	0.0433718
LRP2	low density lipoprotein-related protein 2	R73030	230863_at	1.04444	0.637748	1.43133	0.0215936
CRB2	crumbs homolog 2 (Drosophila)	NM_173689	1552506_at	1.10295	0.485227	1.55253	0.0632071
ZNF596	zinc finger protein 596	AC004908	232641_at	1.74327	0.00657957	1.61372	0.0134644
LOC284600	hypothetical protein LOC284600	AK056486	1559083_x_at	0.741419	0.0355923	1.96473	8.59204e-05
CA10	carbonic anhydrase X	NM_020178	220889_s_at	1.43254	0.00702002	1.4288	0.0162289
---	---	AI689210	232555_at	1.58437	0.0371102	1.93846	0.00384962
AOC3	amine oxidase, copper containing 3 (vascular adhesion protein 1)	NM_003734	204894_s_at	2.64255	0.00706103	1.37661	0.0793388
---	---	AI765791	230343_at	1.05981	0.617704	2.16393	0.0159127
KCTD1	potassium channel tetramerisation domain containing 1	AA115278	226246_at	1.22646	0.0576984	2.16086	0.000152601
---	---	AI668706	236712_at	1.18262	0.082781	1.31553	0.0551238
---	---	U90917	214148_at	1.89755	0.00214551	1.84498	0.00137549
---	---	AI394574	231250_at	1.00963	0.929951	1.37363	0.032727
---	---	AA453791	236067_at	1.38226	0.0143938	1.35726	0.0107147
ZCCHC12	zinc finger, CCHC domain containing 12	AV725825	228715_at	1.85238	0.0210869	1.93548	0.00117989
---	---	BF109461	244690_at	1.49855	0.0186044	1.43885	0.0634442
SEMA3C	sema domain, immunoglobulin domain (Ig), short basic domain, secreted, (semaphorin) 3C	AI962897	203788_s_at	1.13928	0.0267321	1.46311	0.000997946
ADAMTS17	ADAM metallopeptidase with thrombospondin type 1 motif, 17	AA022668	1552727_s_at	1.1798	0.117701	1.54098	0.0220376
---	---	AI742383	240231_at	1.1926	0.423761	1.50997	0.0828003
TRIM55	tripartite motif-containing 55	N55756	232721_at	2.27489	0.0290657	1.44309	0.0123138
---	---	BM683657	1557164_a_at	1.17298	0.0726173	1.54527	0.00174511
FOXD2	forkhead box D2	NM_004474	207653_at	0.723469	0.0220278	1.59708	0.00209527
LOC285535	hypothetical protein LOC285535	AU145323	229130_at	0.882599	0.229037	1.90666	0.000787702
GSTM3	glutathione S-transferase mu 3 (brain)	AL527430	202554_s_at	1.66244	7.86498e-05	2.15768	1.47815e-05
IGF2 /// INS-IGF2	insulin-like growth factor 2 (somatomedin A) /// INS-IGF2 readthrough transcript	NM_000612	202410_x_at	0.938667	0.534535	1.67607	0.0232239
TMC5	transmembrane channel-like 5	NM_024780	219580_s_at	0.498609	0.000211032	2.08991	0.0880013
TMCC3	transmembrane and coiled-coil domain family 3	BG177562	226489_at	0.965619	0.809807	2.15616	0.00189757
---	---	BF752351	240392_at	1.01889	0.827562	1.64285	0.00188842
---	---	AW451432	238786_at	1.02652	0.662865	1.51439	0.0120094
---	---	AW376955	235150_at	1.0692	0.590075	1.37504	0.0244379
NRXN2	neurexin 2	AA608820	209982_s_at	0.23369	1.63968e-05	2.15561	0.000454703
ANKRD13C	ankyrin repeat domain 13C	BC016937	1556361_s_at	3.57374	7.56487e-05	1.53955	0.0319221
GSN	gelsolin (amyloidosis, Finnish type)	NM_000177	200696_s_at	0.444001	2.03504e-05	2.1554	4.04321e-05
---	---	BG231709	229548_at	2.01381	0.00476756	1.81024	0.00707415
CHI3L1	chitinase 3-like 1 (cartilage glycoprotein-39)	M80927	209395_at	0.977908	0.773513	1.68348	0.000157081
SPINK1	serine peptidase inhibitor, Kazal type 1	NM_003122	206239_s_at	1.11159	0.473478	1.40629	0.129627
DCT	dopachrome tautomerase (dopachrome delta-isomerase, tyrosine-related protein 2)	AL139318	205337_at	1.28681	0.0492986	1.45233	0.0250712
REEP1	receptor accessory protein 1	NM_022912	204365_s_at	0.409909	1.65819e-05	2.1543	0.0004643
LUZP1	leucine zipper protein 1	NM_033631	1553224_at	0.997991	0.991201	1.41614	0.0474212
TOX2	TOX high mobility group box family member 2	AA211909	228737_at	7.23331	2.39831e-05	1.90517	0.00100603
C10orf114	chromosome 10 open reading frame 114	BQ007522	1555923_a_at	2.06041	0.00684438	2.15383	0.000164478
EFNA5	Receptor tyrosine kinase ligand LERK-7 precursor (EPLG7)	AK025909	233814_at	0.800867	0.0624852	1.94572	0.0364338
HOXB7	homeobox B7	AW102783	204778_x_at	1.02737	0.690167	2.15297	0.000747219
GPRC5C	G protein-coupled receptor, family C, group 5, member C	NM_022036	219327_s_at	1.19674	0.059568	2.15045	0.0039979
---	---	AU144916	232544_at	1.42997	0.0749871	1.30829	0.169989
GPM6A	glycoprotein M6A	D49958	209470_s_at	1.05968	0.522976	1.4435	0.0599059
---	---	T52172	1561166_a_at	0.902515	0.0733431	1.33708	0.05156
B3GNT8	UDP-GlcNAc:betaGal beta-1,3-N-acetylglucosaminyltransferase 8	AI760623	237338_at	0.978949	0.820478	1.55172	0.0106647
C1orf168	chromosome 1 open reading frame 168	AI452457	238625_at	1.46339	0.0400522	1.27893	0.0567013
TFAP2C	transcription factor AP-2 gamma (activating enhancer binding protein 2 gamma)	U85658	205286_at	1.27359	0.042841	2.14909	0.000344336
HIST1H2BC /// HIST1H2BE /// HIST1H2BF /// HIST1H2BG /// HIST1H2BI	histone cluster 1, H2bc /// histone cluster 1, H2be /// histone cluster 1, H2bf /// histone cluster 1, H2bg /// histone cluster 1, H2bi	BC001131	210387_at	0.794907	0.267093	1.81146	0.0218434
FNDC1	fibronectin type III domain containing 1	AI345957	226930_at	0.844076	0.0784687	1.60884	0.0591885
FRMD3	FERM domain containing 3	BF589413	229893_at	1.47351	0.0027263	2.14613	0.00565398
ACCN2	amiloride-sensitive cation channel 2, neuronal	U78181	37953_s_at	0.78285	0.0147845	1.75288	0.00321712
RXRG	retinoid X receptor, gamma	NM_006917	205954_at	1.04142	0.752865	1.58453	0.0323379
---	---	T65020	227210_at	2.1032	0.00151295	1.93008	0.000572713
---	---	AA678564	238620_at	0.912347	0.40014	1.3394	0.0136389
---	---	BF246855	235031_at	0.904564	0.296795	1.50442	0.0123264
MEF2C	myocyte enhancer factor 2C	N22468	209199_s_at	9.7833	0.0501646	1.57273	0.0164223
---	---	BC039382	1560288_at	1.09845	0.299837	1.30241	0.209896
---	---	AW008791	240315_at	0.653867	0.10864	1.80671	0.00697112
LOC554207	hypothetical LOC554207	BC031469	1555244_at	1.17005	0.0924573	1.40027	0.124741
TEAD3	TEA domain family member 3	AF142482	209454_s_at	1.46741	0.0294138	1.96205	0.00302347
---	---	AI767250	236009_at	1.52418	0.00261602	2.14577	0.0256909
DLGAP4	discs, large (Drosophila) homolog-associated protein 4	BM987094	1557394_at	0.934954	0.746771	1.60649	0.0406503
PDLIM7	CDNA clone IMAGE:4763486	BC023629	1569150_x_at	0.860025	0.343913	2.0587	0.056342
SVEP1	sushi, von Willebrand factor type A, EGF and pentraxin domain containing 1	NM_024500	1553129_at	0.909904	0.138757	1.30379	0.190702
KCNMB4	potassium large conductance calcium-activated channel, subfamily M, beta member 4	AF160967	222857_s_at	1.06897	0.127965	2.14343	1.38693e-05
IGF2 /// INS-IGF2	insulin-like growth factor 2 (somatomedin A) /// INS-IGF2 readthrough transcript	M17863	210881_s_at	0.977113	0.499929	1.44533	0.0198948
---	---	BC032767	1559691_at	0.992125	0.971099	1.56701	0.0262319
PLXNA2	plexin A2	AI694545	227032_at	3.9626	1.00455e-05	1.8789	0.000707325
SCUBE3	signal peptide, CUB domain, EGF-like 3	BE674338	230290_at	0.825595	0.014989	2.1416	0.0149703
PDE4DIP	phosphodiesterase 4D interacting protein	NM_022359	205872_x_at	1.31517	0.0609973	1.77644	0.00393536
---	---	AI743588	239726_at	0.767711	0.0416095	1.72062	0.166826
RHBDL3	rhomboid, veinlet-like 3 (Drosophila)	AL133573	233409_at	0.705526	0.00659338	1.77548	0.000324699
CRYAB	crystallin, alpha B	AF007162	209283_at	1.28916	0.131647	1.60668	0.0224988
CDH11	cadherin 11, type 2, OB-cadherin (osteoblast)	D21254	207173_x_at	1.07407	0.50141	2.13828	0.000211722
TSPAN18	tetraspanin 18	AI161133	228819_at	0.342987	0.00867962	2.13624	0.0206692
CACNB3	calcium channel, voltage-dependent, beta 3 subunit	U07139	209530_at	0.838526	0.0447836	2.13401	9.82532e-05
---	---	AW249634	240076_at	1.55417	0.000671152	1.59442	0.00763549
SLC6A1	solute carrier family 6 (neurotransmitter transporter, GABA), member 1	AI003579	205152_at	0.996675	0.954694	1.28233	0.00818963
EGR1	early growth response 1	AV733950	201693_s_at	1.22814	0.0479954	1.5188	0.0304918
NLRC3	NLR family, CARD domain containing 3	AA694067	236295_s_at	0.779063	0.0139569	2.13348	0.0384368
FAM107A	family with sequence similarity 107, member A	AL050264	209074_s_at	0.918582	0.076591	1.65334	0.0327739
ZEB2	zinc finger E-box binding homeobox 2	NM_014795	203603_s_at	3.13741	0.00348226	1.81043	0.00314867
CXCR7	CDNA clone IMAGE:5266967	BE552368	232746_at	0.86814	0.287922	2.13038	0.000447715
DNAJC1	DnaJ (Hsp40) homolog, subfamily C, member 1	NM_022365	218409_s_at	1.14467	0.131875	2.13015	0.000107398
---	---	AI094180	228479_at	0.772872	0.0484047	2.13015	6.92845e-05
SLC29A4	solute carrier family 29 (nucleoside transporters), member 4	T79475	227281_at	0.738501	0.00226614	2.1301	0.0341812
ABCC2	ATP-binding cassette, sub-family C (CFTR/MRP), member 2	NM_000392	206155_at	1.7127	0.00943437	1.88562	0.00718527
RUNX1	runt-related transcription factor 1	D43968	209360_s_at	3.18473	3.8215e-06	2.12998	0.000253953
GJA3	gap junction protein, alpha 3, 46kDa	BF726530	239572_at	1.51783	0.0174747	1.73476	0.00450736
---	---	AL832624	1565701_at	1.30022	0.0976859	1.4013	0.0341152
DIRAS3	DIRAS family, GTP-binding RAS-like 3	AK021882	215506_s_at	1.54004	0.0597527	1.52561	0.0218636
---	---	AL042660	240094_at	0.955938	0.702027	1.44179	0.0136165
CFTR	cystic fibrosis transmembrane conductance regulator (ATP-binding cassette sub-family C, member 7)	NM_000492	205043_at	8.89679	0.00621139	1.45611	0.0025751
---	---	AI808321	237675_at	0.729554	0.0294033	1.68033	0.107558
---	---	BG533580	235286_at	1.39454	0.000476149	1.55528	0.00534414
C13orf18 /// LOC728970	chromosome 13 open reading frame 18 /// hypothetical LOC728970	NM_025113	219471_at	1.29034	0.00302869	2.1299	0.000342575
CDKN2A	cyclin-dependent kinase inhibitor 2A (melanoma, p16, inhibits CDK4)	NM_000077	207039_at	1.96148	0.00621646	2.12935	0.00336367
C21orf122	chromosome 21 open reading frame 122	BC004343	223768_at	0.96973	0.727717	1.86996	0.00148215
---	---	BE327531	235960_at	0.700697	0.0501521	1.54211	0.0124276
TAL1	T-cell acute lymphocytic leukemia 1	NM_003189	206283_s_at	0.930044	0.317422	1.52215	0.00658882
BHLHE22	basic helix-loop-helix family, member e22	AL134708	228636_at	0.515528	0.00180789	2.12929	0.000133557
DIO2	deiodinase, iodothyronine, type II	U53506	203699_s_at	1.76931	0.0282209	1.51618	0.0263151
HOXA9	homeobox A9	AI246769	209905_at	1.00416	0.94875	1.36112	0.0265086
GALT	galactose-1-phosphate uridylyltransferase	BF002568	242734_x_at	0.940083	0.730563	1.59743	0.0656651
TMEM88	transmembrane protein 88	AL544576	229452_at	1.74314	0.01554	2.12861	0.000671204
---	---	BE503077	230268_at	1.10523	0.0822304	1.62063	0.00605972
SMPX	small muscle protein, X-linked	NM_014332	219772_s_at	2.78779	0.000593046	1.34117	0.0336762
SAMD5	sterile alpha motif domain containing 5	AI700341	228653_at	1.08791	0.642211	1.40676	0.147244
CLIP3	CAP-GLY domain containing linker protein 3	AL117468	212358_at	1.08968	0.249146	2.12807	0.00861882
BMI1	BMI1 polycomb ring finger oncogene	NM_005180	202265_at	1.32284	0.0039613	2.12719	3.86045e-05
TAC1	tachykinin, precursor 1	NM_003182	206552_s_at	4.50259	0.0247364	1.72516	0.0276048
---	---	AF087987	1560960_at	1.26621	0.00929205	1.2902	0.00584158
SNED1	sushi, nidogen and EGF-like domains 1	N73970	213488_at	0.968653	0.638394	1.96839	0.00851368
---	---	AI832118	227452_at	4.55391	5.72787e-06	1.60165	0.00561524
ARNTL	aryl hydrocarbon receptor nuclear translocator-like	AB000812	209824_s_at	4.89298	0.000781387	1.78741	0.0246548
---	---	AA480677	239934_x_at	0.999771	0.996853	1.37932	0.101442
MNX1	motor neuron and pancreas homeobox 1	AI738662	214614_at	1.0773	0.642195	1.56438	0.00727351
RNF165	ring finger protein 165	BF529886	1557545_s_at	0.697083	0.175749	1.82059	0.000487186
DENR	density-regulated protein	AW665791	238982_at	0.695664	0.0315102	1.45042	0.0837225
LOC100128439	hypothetical protein LOC100128439	BC032415	1558448_a_at	1.17569	0.500758	1.50382	0.208864
---	---	AI738422	243441_at	0.917116	0.16937	1.59374	0.00139192
---	---	AI422414	238733_at	2.3762	0.00783037	1.31509	0.0216502
PROX1	prospero homeobox 1	NM_002763	207401_at	1.9353	0.0917388	1.49023	0.00297945
APOA1	apolipoprotein A-I	NM_000039	204450_x_at	1.00279	0.909226	1.51493	0.000981135
LNPEP	leucyl/cystinyl aminopeptidase	AA767440	231866_at	1.09188	0.762334	1.70655	0.000414319
KCNMB4	potassium large conductance calcium-activated channel, subfamily M, beta member 4	NM_014505	219287_at	1.05445	0.419921	2.1269	7.45223e-05
---	---	H12055	240869_at	1.37257	0.0542363	1.42115	0.0595468
---	---	AU158705	229049_at	0.999718	0.997598	1.40609	0.113493
LY6K	lymphocyte antigen 6 complex, locus K	AA723810	223687_s_at	4.23159	0.00468495	1.96279	1.59197e-05
ZFHX4	zinc finger homeobox 4	NM_024721	219779_at	1.48441	0.0750292	1.49833	0.0373733
KRT25	keratin 25	AI150703	237905_at	1.07044	0.415327	1.28328	0.0967711
---	---	AA908970	239716_at	0.770893	0.161935	1.4632	0.017107
PION	pigeon homolog (Drosophila)	AK026747	222150_s_at	2.16119	0.00273817	2.1263	0.000497012
---	---	AL043482	242606_at	1.18545	0.234704	1.39894	0.0442073
HOXA2	homeobox A2	NM_006735	214457_at	1.06821	0.478176	1.30446	0.109729
FXR2	Fragile X mental retardation, autosomal homolog 2, mRNA (cDNA clone MGC:21187 IMAGE:4385430)	AI703341	222050_at	1.44625	0.0168551	1.58451	0.0137764
---	---	BF434212	237942_at	0.87593	0.440025	1.43984	0.00976836
CDX2	caudal type homeobox 2	U51096	206387_at	0.942356	0.432811	1.65065	0.00334113
DIO2	deiodinase, iodothyronine, type II	AI038059	231240_at	1.23873	0.0272964	1.31441	0.00714812
PKNOX2	PBX/knotted 1 homeobox 2	D81792	63305_at	0.661514	0.0021422	2.12375	0.0127029
RAB30	RAB30, member RAS oncogene family	AW181898	227842_at	1.1775	0.0695207	1.83356	0.00287106
MACC1	metastasis associated in colon cancer 1	AL359055	1566764_at	0.570573	0.0256254	1.6108	0.0353856
LUM	lumican	NM_002345	201744_s_at	3.61731	0.0977423	1.23505	0.0140927
CPAMD8	C3 and PZP-like, alpha-2-macroglobulin domain containing 8	AB033109	227721_at	0.760967	0.0680704	1.71274	0.011186
NPFF	neuropeptide FF-amide peptide precursor	NM_003717	206402_s_at	0.722937	0.0153757	2.12364	9.41366e-05
---	---	R40701	244048_x_at	1.10648	0.146969	1.24136	0.179285
KLHL35	kelch-like 35 (Drosophila)	NM_173583	1553611_s_at	0.910756	0.433389	1.88879	0.00114447
---	---	T16544	235561_at	1.27524	0.218206	1.45443	0.0143504
ADAMTS6	ADAM metallopeptidase with thrombospondin type 1 motif, 6	N71063	237411_at	4.79218	0.000392417	2.12162	0.0111946
KLHL4	kelch-like 4 (Drosophila)	NM_057162	1553027_a_at	1.28863	0.166083	2.13464	0.0679969
RHOU	ras homolog gene family, member U	AB051826	223169_s_at	2.31981	0.000304499	2.11964	0.000700834
MBNL1	MBNL protein	AI697540	235879_at	0.983883	0.891167	1.31171	0.0702776
ROBO2	roundabout, axon guidance receptor, homolog 2 (Drosophila)	AB046788	226766_at	1.24758	0.281443	1.31326	0.0925397
LEF1	lymphoid enhancer-binding factor 1	AF294627	210948_s_at	1.22897	0.0330677	1.46092	0.00444206
TIAM2	T-cell lymphoma invasion and metastasis 2	AI094945	222942_s_at	2.70827	7.59859e-05	1.96442	0.000728316
FRZB	frizzled-related protein	U91903	203697_at	0.948419	0.522667	1.95443	0.000545174
EFNB2	ephrin-B2	BF001670	202668_at	4.34073	3.74946e-05	2.11945	0.000124671
---	---	R20647	239340_at	0.917914	0.48131	1.32718	0.0754306
---	---	BE550429	236908_at	1.00404	0.971872	1.53141	0.0213426
LCA5	Leber congenital amaurosis 5	AI379143	242006_at	1.70268	0.0977914	1.39667	0.00012406
GLUD1	glutamate dehydrogenase 1	AA909218	244802_at	1.06278	0.726334	1.44103	0.11499
---	---	AI922696	242612_at	0.748321	0.0429466	1.42799	0.0175046
NTN1	netrin 1	BF591483	227816_at	0.873674	0.520756	1.95399	4.78429e-05
INHBB	inhibin, beta B	NM_002193	205258_at	0.88573	0.496294	2.11479	0.00868895
FOXP4	forkhead box P4	AI673539	227120_at	1.0353	0.612322	1.87317	0.00499834
LOC286382	hypothetical protein LOC286382	AW136975	240545_at	1.03966	0.7354	2.11204	0.00233786
ITIH4	inter-alpha (globulin) inhibitor H4 (plasma Kallikrein-sensitive glycoprotein)	D38535	37201_at	1.22094	0.0060064	1.64674	0.00185638
FLJ27352	hypothetical LOC145788	AA398658	243309_at	1.01406	0.927271	1.61344	0.11056
---	---	AU147515	233130_at	1.04177	0.681672	1.44015	0.0390627
ARHGAP24	Rho GTPase activating protein 24	AI743534	223422_s_at	2.98923	0.0332382	1.42378	0.0126236
PM20D2	peptidase M20 domain containing 2	BE779764	225431_x_at	3.86116	0.0279237	1.76287	0.0059243
---	---	AA703523	237006_at	0.858251	0.420127	1.48506	0.0226369
LOC255480	hypothetical protein LOC255480	AA461045	239919_at	1.02081	0.84396	1.6546	0.00537096
SHB	Src homology 2 domain containing adaptor protein B	AL138752	204656_at	1.77621	0.00135385	2.1112	0.000506638
ADAMTS5	ADAM metallopeptidase with thrombospondin type 1 motif, 5	NM_007038	219935_at	2.39057	0.122168	1.25506	0.0197021
RBMS3	RNA binding motif, single stranded interacting protein	NM_014483	206767_at	1.64823	0.00142628	1.3973	0.0115996
TMEM154	transmembrane protein 154	AA806283	238063_at	4.10726	0.00309275	1.72208	0.0176638
COL6A1	collagen, type VI, alpha 1	AI141603	212091_s_at	0.919931	0.541063	1.73376	0.0140645
---	---	AA001287	239396_at	2.1119	0.000484584	2.1109	0.00117602
---	---	AL355688	232081_at	0.953792	0.158092	1.36391	0.0134753
---	---	AI742043	228507_at	0.720066	0.00195693	2.11069	0.00140476
---	---	AI675336	244663_at	1.77254	0.00395121	1.47631	0.0121124
---	---	AW470799	242261_at	0.623182	0.0368789	1.83018	0.00494926
WDR1	CDNA FLJ58303 complete cds, highly similar to WD repeat protein 1	AW770902	240282_at	0.976598	0.796211	1.76551	0.00842955
---	---	BC041127	1569362_at	1.2981	0.0377853	1.27007	0.0579541
---	---	D81004	235693_at	0.554308	0.0138779	1.70399	0.00697444
ZBTB1	Zinc finger and BTB domain containing 1 (ZBTB1), transcript variant 1, mRNA	BU950380	1557036_at	0.932921	0.547944	1.31933	0.0102978
---	---	BI791845	1558710_at	0.72887	0.199858	1.67208	0.0282932
---	---	AI423466	230657_at	1.0177	0.855829	1.2697	0.0718326
C21orf34	CDNA FLJ38295 fis, clone FCBBF3012332	N66393	239999_at	1.16212	0.0290498	1.2486	0.0193055
---	---	AI004009	222288_at	0.799634	0.0240404	2.1099	0.000537921
GABRG1	gamma-aminobutyric acid (GABA) A receptor, gamma 1	N92667	241805_at	1.16032	0.183112	1.27267	0.0406646
LY6G6D	lymphocyte antigen 6 complex, locus G6D	NM_021246	207457_s_at	0.949146	0.649346	1.62322	0.00175316
TNFRSF25	tumor necrosis factor receptor superfamily, member 25	NM_003790	219423_x_at	3.46771	8.31927e-05	1.92366	0.013057
---	---	AI122787	231111_at	0.843298	0.296402	1.593	0.00862057
DKFZp667E0512	hypothetical protein DKFZp667E0512	AA649070	236079_at	1.42085	0.0772956	1.77785	0.00327658
GAS6 /// LOC100133684	growth arrest-specific 6 /// similar to growth arrest-specific 6	NM_000820	202177_at	0.909349	0.392819	1.95973	0.00125168
FOXP2	forkhead box P2	AF467257	1555352_at	0.929907	0.159149	1.29756	0.000473084
P2RY5	purinergic receptor P2Y, G-protein coupled, 5	NM_005767	218589_at	1.02409	0.729086	2.16749	0.0586542
---	---	AA156754	225176_at	1.05588	0.547735	1.96265	0.00039564
TRAM2	translocation associated membrane protein 2	AI986461	202368_s_at	1.93634	0.197851	1.91191	0.0242259
KCNB1	potassium voltage-gated channel, Shab-related subfamily, member 1	L02840	211006_s_at	1.95877	0.0351138	1.70889	0.0489447
---	---	BF844863	238824_at	1.0143	0.912637	1.66412	0.109222
LOC285943	Hypothetical protein LOC285943, mRNA (cDNA clone IMAGE:5180590)	AI473887	242528_at	0.939269	0.500685	1.30015	0.0366913
CACNA1G	calcium channel, voltage-dependent, T type, alpha 1G subunit	NM_018896	207869_s_at	0.865744	0.0533184	1.26979	0.0239837
LOC100131317 /// POU4F1	similar to hCG1781072 /// POU class 4 homeobox 1	NM_006237	206940_s_at	1.10873	0.420338	1.36789	0.0222692
B3GALNT2	beta-1,3-N-acetylgalactosaminyltransferase 2	AK091497	1562391_at	0.846187	0.332064	1.48987	0.0368779
COG2	component of oligomeric golgi complex 2	AI218945	243608_at	0.962841	0.825706	1.5739	0.0142341
SOCS3	suppressor of cytokine signaling 3	AI244908	227697_at	4.14989	0.000325694	1.91156	0.00300904
MAP3K8	CDNA FLJ78064 complete cds, highly similar to Human mRNA for proto-oncogene protein	AV713062	235421_at	1.36078	0.199778	2.10842	0.00426303
C21orf130	chromosome 21 open reading frame 130	H08345	240068_at	0.992849	0.935927	1.29681	0.0937448
PCDH7	protocadherin 7	BE644809	228640_at	1.18637	0.0118916	2.10789	0.00124506
KCNJ12	potassium inwardly-rectifying channel, subfamily J, member 12	NM_021012	207110_at	0.626116	0.03209	2.10564	0.000705559
---	---	BF111276	230859_at	5.23956	0.00717803	1.92981	0.000457796
PROX1	prospero homeobox 1	BF223556	229376_at	1.94636	0.0291616	1.61659	0.00346
TMOD1	tropomodulin 1	BC002660	203661_s_at	1.42071	0.00881103	2.10524	2.6601e-05
---	---	AA843122	235803_at	0.355361	0.000196863	1.62274	0.000822051
TMEM31	transmembrane protein 31	N58489	231569_at	0.629789	0.0909424	1.75028	0.0011079
LOC283143	hypothetical protein LOC283143	BE348537	239675_at	1.05638	0.498397	1.34484	0.153779
BAHCC1	BAH domain and coiled-coil containing 1	NM_024696	219218_at	0.830613	0.0063565	1.97412	0.00455722
GATA2	GATA binding protein 2	BC002557	210358_x_at	1.26767	0.0989824	1.86234	0.000386626
PGF	placental growth factor	BC001422	209652_s_at	1.60973	0.0104992	1.64285	0.00510638
NAALAD2	N-acetylated alpha-linked acidic dipeptidase 2	AL133614	233815_at	0.77994	0.0525314	2.1007	0.00620639
DMRTC1 /// DMRTC1B	DMRT-like family C1 /// DMRT-like family C1B	BC029799	1553998_at	1.27158	0.127613	1.71046	0.0212794
IL6ST	interleukin 6 signal transducer (gp130, oncostatin M receptor)	AB015706	211000_s_at	2.13657	0.157454	1.54414	0.0181061
LOC100130275	hypothetical protein LOC100130275	BU740857	1557070_at	1.14443	0.160448	1.67296	0.0150059
JPH2	junctophilin 2	AA716165	229578_at	2.09672	0.000837253	1.59116	0.00771307
IGFBP5	insulin-like growth factor binding protein 5	AW157548	203424_s_at	1.58549	0.023789	1.44913	0.0481655
COL9A2	Collagen, type IX, alpha 2, mRNA (cDNA clone MGC:167937 IMAGE:9020314)	AU145185	232542_at	0.908757	0.122901	1.46345	0.0202619
FAM160B2	family with sequence similarity 160, member B2	NM_018331	222929_at	0.900631	0.246243	1.6762	0.00172001
HOOK3	hook homolog 3 (Drosophila)	AV710762	1558315_s_at	0.940541	0.581069	1.25311	0.00484592
P4HA2	prolyl 4-hydroxylase, alpha polypeptide II	NM_004199	202733_at	2.30428	0.000301358	1.8524	0.000849251
FLNC	filamin C, gamma (actin binding protein 280)	NM_001458	207876_s_at	4.79614	4.67424e-05	2.10051	3.18466e-05
FBRS	fibrosin	AI149639	242217_s_at	1.68384	0.000487477	1.60851	0.0154365
KALRN	kalirin, RhoGEF kinase	AI125425	236651_at	1.6193	0.0149812	1.43891	0.0687194
OSR2	odd-skipped related 2 (Drosophila)	AI811298	213568_at	1.20057	0.133074	1.31839	0.0616041
LOC440993	hypothetical gene supported by AK128346	CA418406	1557293_at	2.22194	0.000258879	1.62543	0.00347788
MICALL2	MICAL-like 2	AK091986	1555862_s_at	5.74699	0.00165085	1.41748	0.0304446
SLC16A3	solute carrier family 16, member 3 (monocarboxylic acid transporter 4)	AA853175	217691_x_at	1.68148	0.0179981	1.76861	0.0133089
---	---	AU147500	233442_at	1.02326	0.858473	1.46241	0.0140193
TFG	TRK-fused gene	AI908188	244614_at	0.864556	0.125915	1.32475	0.0994164
---	---	AF075067	1565889_at	0.887117	0.240768	1.34252	0.00942547
---	---	AI950023	244433_at	0.868509	0.0104726	1.46151	0.00014646
LIMA1	LIM domain and actin binding 1	BF197289	222456_s_at	1.12348	0.0150721	1.36352	0.237565
LOC285084	hypothetical protein LOC285084	AA416910	1557570_a_at	2.90338	0.0324912	1.28542	0.00890769
NOD1	nucleotide-binding oligomerization domain containing 1	AF126484	224190_x_at	1.48222	0.093694	1.73904	0.00554561
LYPD6B	LY6/PLAUR domain containing 6B	BF060747	228360_at	1.86659	0.000378035	2.09984	0.000690326
EML5	Echinoderm microtubule associated protein like 5, mRNA (cDNA clone IMAGE:5582318)	AW026978	242443_at	1.5696	0.000220797	1.49016	0.0102672
---	---	AI887749	243591_at	1.35339	0.0229796	1.98661	0.00101567
NHLH1	nescient helix loop helix 1	M96739	214628_at	1.58432	0.00553985	1.80739	0.00448446
FLJ30375	CDNA clone IMAGE:5301781	AI367357	1557155_a_at	1.03511	0.652162	1.39139	0.0375818
---	---	R02287	240927_at	0.867994	0.248397	1.32393	0.0149879
LRCH3	leucine-rich repeats and calponin homology (CH) domain containing 3	AL832278	1559490_at	0.587312	0.0590071	1.64862	0.0182352
GADD45B	growth arrest and DNA-damage-inducible, beta	AF087853	209304_x_at	4.21404	1.57922e-06	1.96942	7.27085e-05
PION	pigeon homolog (Drosophila)	AV700415	213142_x_at	1.98834	0.000411694	1.92799	0.000152239
TNFRSF11B	tumor necrosis factor receptor superfamily, member 11b	NM_002546	204933_s_at	0.960876	0.412447	1.56914	0.0053329
BTG3	BTG family, member 3	BC028229	1556213_a_at	1.17533	0.228367	1.47682	0.0101527
LOC150759	hypothetical protein LOC150759	W95043	213703_at	0.882146	0.188919	1.38655	0.0311397
JMJD5	CDNA FLJ55984 complete cds	AI268287	237229_at	1.3851	0.082388	1.41506	0.0578784
H19	H19, imprinted maternally expressed transcript (non-protein coding)	AL575306	224997_x_at	0.834994	0.375677	1.54927	0.122085
PDE7B	phosphodiesterase 7B	AI638433	230109_at	1.40787	0.0629575	1.38475	0.0432681
MAP1B	microtubule-associated protein 1B	AA554833	226084_at	2.25115	0.126833	2.09878	3.41056e-06
BCL3	B-cell CLL/lymphoma 3	NM_005178	204908_s_at	2.06704	0.0265951	1.69917	0.0227785
C16orf55	chromosome 16 open reading frame 55	AI240553	229660_at	0.922611	0.50011	1.81131	0.00154772
---	---	N22849	230300_at	1.15272	0.402886	1.82532	0.000904121
TCF15	transcription factor 15 (basic helix-loop-helix)	NM_004609	207306_at	0.919973	0.307579	1.67649	0.00916107
---	---	AU147038	1565881_at	1.01052	0.741943	1.26059	0.00228043
PRRX1	paired related homeobox 1	NM_006902	205991_s_at	1.16831	0.323389	1.39994	0.0799565
C14orf82	chromosome 14 open reading frame 82	AU148054	233106_at	0.93701	0.372103	1.40981	0.00808296
FLJ90757	hypothetical protein LOC440465	AK096609	1566558_x_at	0.750499	0.00831049	1.94941	0.0277845
COL13A1	collagen, type XIII, alpha 1	M59217	211809_x_at	0.641204	0.0176926	1.98909	0.0156768
SULF2	sulfatase 2	AL034418	233555_s_at	3.71037	0.000146604	1.99327	0.000900925
TNFRSF25	tumor necrosis factor receptor superfamily, member 25	AF026071	210847_x_at	3.35858	3.76313e-05	1.78777	0.00873834
---	---	AI038503	244788_at	0.92215	0.580036	1.53125	0.0052616
SPSB4	splA/ryanodine receptor domain and SOCS box containing 4	AL563476	229929_at	0.713396	0.0518788	1.95816	0.068294
EXOC3	exocyst complex component 3	W69265	228847_at	1.65807	0.0250373	1.68718	0.00731549
---	---	BE502455	237918_at	1.013	0.689095	1.2785	0.0018319
CDH11	cadherin 11, type 2, OB-cadherin (osteoblast)	AI754693	236179_at	1.38544	0.0567707	2.09726	0.00379499
MSRB3	methionine sulfoxide reductase B3	AW027333	225782_at	1.35259	0.0587799	1.81784	0.0285325
---	---	BC009270	1570124_at	0.588821	0.0293517	1.69234	0.0270172
---	---	AI587332	244524_at	0.948869	0.738664	1.3906	0.0582823
TAS2R10	taste receptor, type 2, member 10	NM_023921	221397_at	1.01579	0.904886	1.22534	0.146057
---	---	BF698797	236300_at	0.669853	0.00115104	1.97098	0.000531187
HOXA11	homeobox A11	H94842	213823_at	0.970339	0.712038	2.09708	0.000196685
RNFT1	ring finger protein, transmembrane 1	N51514	227268_at	1.67395	0.0287697	1.57583	0.01884
---	---	AV700081	243158_at	0.918881	0.284863	1.33414	0.013237
DAAM2	dishevelled associated activator of morphogenesis 2	BF513244	212793_at	2.11173	0.00298337	1.73265	0.00629611
DENND2A	DENN/MADD domain containing 2A	AL037701	221886_at	0.795007	0.0616572	1.59724	0.00322385
RAB40B	RAB40B, member RAS oncogene family	NM_006822	204547_at	1.47467	0.00730174	1.80559	0.00544829
SEZ6L	seizure related 6 homolog (mouse)-like	AB023144	213609_s_at	0.623029	0.0254544	1.99888	0.000636896
ANK1	ankyrin 1, erythrocytic	NM_000037	205390_s_at	3.50457	1.43466e-05	1.68003	2.85303e-05
---	---	AI452512	236219_at	1.04612	0.7217	1.56143	0.0202831
ASXL1	additional sex combs like 1 (Drosophila)	AI819150	242439_s_at	1.03953	0.70257	1.66527	0.00744497
SLC25A34	solute carrier family 25, member 34	AU151211	232245_at	1.70179	0.00392594	1.71567	0.0084922
BBX	bobby sox homolog (Drosophila)	BU689085	1557239_at	0.9129	0.461356	1.31109	0.199
FMNL3	formin-like 3	AI089932	227844_at	1.30749	0.0426596	1.75702	0.00265654
LOC441245	hypothetical LOC441245	BC015643	1561964_at	1.04968	0.523413	1.30001	0.0763398
---	---	BQ028191	1556385_at	1.99279	0.00609799	1.9575	0.000250178
BOC	Boc homolog (mouse)	AY027658	224184_s_at	0.908597	0.401094	1.80781	0.00424923
RPRML	reprimo-like	BC033942	1554655_a_at	0.698953	0.0443573	1.81976	0.0463222
---	---	AK024805	1558783_at	0.798379	0.106559	1.53586	0.0623885
RPP30	ribonuclease P/MRP 30kDa subunit	AW182934	1556063_s_at	1.23236	0.140728	1.59183	0.00169969
PDGFRB	platelet-derived growth factor receptor, beta polypeptide	NM_002609	202273_at	1.58854	0.00549486	1.93044	0.000656374
KREMEN1	kringle containing transmembrane protein 1	BF221745	227250_at	1.56551	0.00595429	2.09662	0.0068656
---	---	AA747287	242273_at	0.397201	0.00127706	1.95684	8.20101e-06
AGPAT3	1-acylglycerol-3-phosphate O-acyltransferase 3	BC004219	223184_s_at	1.37491	0.011833	1.87378	0.00198198
---	---	T97544	242924_at	1.01709	0.854308	1.26822	0.11058
---	---	AI276403	235337_at	0.906552	0.55069	1.92329	0.000831486
UQCRB	ubiquinol-cytochrome c reductase binding protein	AW445136	244293_at	0.70982	0.00728365	1.42275	0.0258691
MAL	mal, T-cell differentiation protein	NM_002371	204777_s_at	1.10644	0.203716	1.59764	0.219709
COL1A1	collagen, type I, alpha 1	AI743621	202311_s_at	1.20538	0.301438	1.29795	0.13288
C6orf123 /// LOC100133056	chromosome 6 open reading frame 123 /// similar to HGC6.2	BC027853	1555095_at	1.11048	0.186848	1.2455	0.0665936
---	---	N46436	1556568_a_at	0.982219	0.875215	1.41458	0.00911657
---	---	AW027431	230640_at	1.8021	0.00260887	2.09478	0.000500068
PEAR1	platelet endothelial aggregation receptor 1	AL040178	228618_at	5.99495	0.00356995	1.65413	0.00013277
CNPY1	canopy 1 homolog (zebrafish)	AI147733	1559283_a_at	1.04801	0.501715	1.31051	0.0511082
NRXN3	neurexin 3	AF123462	215020_at	1.21373	0.106753	1.63967	0.0104372
LOC650392	CDNA clone IMAGE:5264670	BC036550	1569872_a_at	0.534209	0.00265743	1.94032	0.0240675
---	---	AI216567	236754_at	0.869653	0.307271	1.71932	0.0028686
---	---	AF318318	1570412_at	1.02769	0.813175	1.45443	0.0698053
PION	CDNA clone IMAGE:6060501	AW664903	240061_at	0.924784	0.372457	1.31774	0.105882
RAGE	renal tumor antigen	NM_014226	205130_at	1.77771	0.00105029	1.76347	0.000426632
EFEMP2	EGF-containing fibulin-like extracellular matrix protein 2	AB030655	209356_x_at	0.838729	0.204406	1.77384	0.0231718
C8orf48	chromosome 8 open reading frame 48	AA496024	236634_at	1.2639	0.0498748	1.42088	0.00506831
SPSB1	splA/ryanodine receptor domain and SOCS box containing 1	NM_025106	219677_at	1.73077	0.0208023	1.53545	0.0027039
TGFBR1	Homo sapiens, clone IMAGE:4750477, mRNA	AV700621	236561_at	1.02343	0.919671	1.64414	0.0274103
NPFF	neuropeptide FF-amide peptide precursor	AW195837	214184_at	0.905899	0.308989	1.59047	0.0541579
SLC16A3	solute carrier family 16, member 3 (monocarboxylic acid transporter 4)	AL513917	202855_s_at	1.31522	0.0482715	1.61099	0.0528349
---	---	R64696	243931_at	1.16559	0.134436	2.09231	0.00759575
GPR56	G protein-coupled receptor 56	AL554008	212070_at	5.40569	0.0207006	2.09094	0.000390032
C9orf130	chromosome 9 open reading frame 130	BF592774	239799_at	0.710378	0.000669825	2.0893	0.000473777
C14orf45	chromosome 14 open reading frame 45	NM_025057	220173_at	1.86001	0.00697345	1.31613	0.0217147
MDFIC	MyoD family inhibitor domain containing	BC040713	1559942_at	4.12608	4.23036e-07	1.89869	1.23225e-05
---	---	AA833902	242074_at	0.75009	0.025449	1.45779	0.00259618
SGMS2	sphingomyelin synthase 2	AI963083	227038_at	1.34478	0.0180325	1.25597	0.0362654
KIAA1755	KIAA1755	AW014122	1561394_s_at	1.0301	0.760871	1.39721	0.0420066
TMC5	transmembrane channel-like 5	AI738488	236983_at	0.549733	0.000371998	1.49636	0.0161343
LTBP3	latent transforming growth factor beta binding protein 3	AW515704	227308_x_at	1.94418	0.000438776	1.8675	0.000565556
LOC286440	hypothetical protein LOC286440	AL034399	209733_at	0.958062	0.702903	1.56037	0.0454249
CYP27B1	cytochrome P450, family 27, subfamily B, polypeptide 1	NM_000785	205676_at	2.20713	5.46783e-05	1.73321	9.96893e-05
HHAT	hedgehog acyltransferase	NM_018194	219687_at	2.2531	0.000105963	1.79231	0.00145009
---	---	AL360257	233482_at	0.684405	0.0297733	1.68095	0.00403303
---	---	AW195610	236004_at	1.26535	0.0112307	1.7773	0.00214201
CDK6	cyclin-dependent kinase 6	AW274756	224851_at	1.43558	0.270321	2.12557	0.00823492
---	---	AI820886	230594_at	1.13182	0.343326	1.28503	0.0397471
IGDCC3	immunoglobulin superfamily, DCC subclass, member 3	AI740721	230960_at	1.20368	0.0472943	2.08876	0.00014235
C1orf161	chromosome 1 open reading frame 161	NM_152367	1553333_at	0.997049	0.918815	1.28245	0.22357
HRASLS5	HRAS-like suppressor family, member 5	AW771586	231050_at	1.02399	0.727919	1.59115	0.0185156
MYLK3	myosin light chain kinase 3	BC039103	1568925_at	1.06112	0.233042	1.217	0.128608
---	---	BF938956	237096_at	1.21786	0.00995742	1.36049	0.0423795
---	---	BC040322	1556239_a_at	1.4857	0.0810213	1.26153	0.096738
NEDD9	neural precursor cell expressed, developmentally down-regulated 9	BC020686	1569020_at	2.36473	0.0162616	1.53445	0.0954116
---	---	BF110426	243237_at	1.01366	0.829716	1.47883	0.0716386
---	---	AW207634	243782_at	1.16416	0.10082	1.2692	0.0838193
---	---	AW474420	1557835_at	1.0797	0.550312	1.64539	0.00293367
ST3GAL6	ST3 beta-galactoside alpha-2,3-sialyltransferase 6	AB022918	210942_s_at	0.621111	0.0122265	1.86733	0.0111841
C14orf113	chromosome 14 open reading frame 113	NM_017630	221101_at	1.1328	0.226368	1.27553	0.1001
LOC283788	hypothetical protein LOC283788	N50864	229007_at	0.900959	0.200833	1.43699	0.00990085
---	---	AI568622	231225_at	0.943444	0.789882	1.71517	0.0784906
MXD4	MAX dimerization protein 4	BC002713	210778_s_at	0.919765	0.660089	1.82308	0.000421192
RAI2	retinoic acid induced 2	NM_021785	219440_at	1.71838	0.00176095	1.67104	0.0132229
COL24A1	collagen, type XXIV, alpha 1	AI631241	238732_at	1.28509	0.112523	1.67405	0.0221707
---	---	AA808178	235743_at	0.612652	0.0253567	1.54864	0.230531
MUC20	mucin 20, cell surface associated	AW084511	226622_at	2.89735	0.00046994	1.5967	0.00376931
---	---	AW450572	238769_at	0.759924	0.0987932	1.47775	0.00371855
AKR1CL2	aldo-keto reductase family 1, member C-like 2	AI243406	1559982_s_at	1.22307	0.125284	1.52721	0.0171244
---	---	AK024999	234222_at	0.938245	0.272201	1.33439	0.00174135
---	---	AL831840	1556294_at	1.01203	0.892473	1.34343	0.0811297
GALNTL1	UDP-N-acetyl-alpha-D-galactosamine:polypeptide N-acetylgalactosaminyltransferase-like 1	AI097463	230417_at	0.869815	0.140867	1.58561	0.0287516
SFRS4	CDNA FLJ50118 complete cds, highly similar to Splicing factor, arginine/serine-rich 4	AI435248	242837_at	1.01835	0.893088	1.91387	0.004209
TLE3	transducin-like enhancer of split 3 (E(sp1) homolog, Drosophila)	BE967118	228340_at	1.29709	0.0331955	2.08815	0.00168584
WNT2B	wingless-type MMTV integration site family, member 2B	NM_024494	206458_s_at	1.71583	0.00349588	1.31325	0.0620414
STOM	stomatin	M81635	201062_at	1.09581	0.12955	1.29076	0.023909
C10orf140	chromosome 10 open reading frame 140	AI363206	1559266_s_at	1.21546	0.0855414	2.08749	0.000239333
MEF2C	myocyte enhancer factor 2C	AL536517	209200_at	5.97902	0.00838468	2.08714	3.11115e-05
LOC347475	UPF0625 coiled-coil domain-containing protein ENSP00000359845	BC017958	1563022_at	0.532969	0.00754247	2.08334	0.00110569
ITGA5	integrin, alpha 5 (fibronectin receptor, alpha polypeptide)	NM_002205	201389_at	2.22942	0.000132286	2.08295	0.00163962
PPP1R16B	protein phosphatase 1, regulatory (inhibitor) subunit 16B	AK026900	233813_at	1.05444	0.785939	1.49782	0.0249439
HOXD3	homeobox D3	Y09980	217076_s_at	0.873418	0.20654	1.26528	0.0244595
---	---	AK094652	1560021_at	0.927118	0.363209	1.3087	0.0282389
---	---	AI912723	240250_at	1.30078	0.134614	1.24098	0.140913
KCNJ12 /// LOC100131509 /// LOC100134444	potassium inwardly-rectifying channel, subfamily J, member 12 /// similar to inward rectifying K+ channel negative regulator Kir2.2v /// similar to hkir2.2x	NM_002244	208567_s_at	0.63245	0.00177495	1.59979	0.00340303
SOX5	SRY (sex determining region Y)-box 5	NM_006940	207336_at	1.3132	0.0791073	1.53058	0.163428
---	---	W61005	213675_at	1.6292	0.001019	1.66949	0.00616924
SULF2	sulfatase 2	AL133001	224724_at	3.74579	3.25297e-06	2.08259	0.000103619
CYP46A1	cytochrome P450, family 46, subfamily A, polypeptide 1	NM_006668	220331_at	0.987188	0.918033	2.08097	0.00207364
---	---	AL047534	238393_at	0.962395	0.510154	1.24801	0.0648164
PAPOLB	poly(A) polymerase beta (testis specific)	AA609118	242158_at	1.12809	0.23033	1.23872	0.025279
GOLSYN	Golgi-localized protein	NM_017786	218692_at	12.27	0.00118336	2.0801	0.00108042
---	---	BE894306	235989_at	0.874521	0.0252449	1.86867	4.73999e-06
TNFAIP2	tumor necrosis factor, alpha-induced protein 2	NM_006291	202510_s_at	2.40408	0.000403166	1.84663	1.87257e-05
---	---	AW293316	239668_at	1.3891	0.0774905	1.34183	0.0347641
AAK1	AP2 associated kinase 1	AW628987	225522_at	1.46402	0.0123584	2.07944	4.67907e-05
DDC	dopa decarboxylase (aromatic L-amino acid decarboxylase)	NM_000790	205311_at	1.25768	0.00456799	2.07793	0.00232835
---	---	AI699465	229844_at	2.08569	0.00639723	2.07688	0.00908484
SETD7	SET domain containing (lysine methyltransferase) 7	AI985614	244653_at	0.912059	0.393862	1.5313	0.0197644
---	---	AI810266	235456_at	0.627161	0.00590035	2.07622	0.000290431
CSAD	cysteine sulfinic acid decarboxylase	BC018042	1568620_at	1.08626	0.336959	1.34701	0.0398975
COL1A1	collagen, type I, alpha 1	BE221212	1556499_s_at	2.15661	0.00990389	2.07396	0.0147941
---	---	AW205474	236668_at	0.999191	0.994807	1.45938	0.0631348
MGEA5	Meningioma expressed antigen 5 (hyaluronidase), mRNA (cDNA clone MGC:48750 IMAGE:5558183)	AU144791	214972_at	0.871428	0.23503	1.37372	0.0075267
TRO	trophinin	NM_016157	205028_at	0.96339	0.745703	1.64249	0.00413322
---	---	AI743607	237310_at	1.08555	0.517899	1.63773	0.00543736
COL5A1	collagen, type V, alpha 1	AI130969	203325_s_at	1.55411	0.001325	2.07378	0.000120344
---	---	AA102667	217625_x_at	0.651955	0.00219958	1.47237	0.000254104
UBE2J1	ubiquitin-conjugating enzyme E2, J1 (UBC6 homolog, yeast)	AF151039	217825_s_at	2.80539	0.000272442	1.91943	0.000322764
---	---	Z83821	216568_x_at	1.14382	0.182716	1.97399	0.000746033
---	---	AF086242	1556416_s_at	0.867787	0.401209	1.55513	0.00364531
AXL	AXL receptor tyrosine kinase	NM_021913	202686_s_at	3.47739	0.00584926	2.07271	7.73353e-05
NSD1	nuclear receptor binding SET domain protein 1	AI421972	235760_at	3.53413	2.99742e-05	1.56615	0.00300037
GNAS	Adenyl cyclase mRNA	AI693143	229274_at	0.634473	0.0597394	1.87712	0.00141887
DKK3	dickkopf homolog 3 (Xenopus laevis)	NM_013253	202196_s_at	1.6659	0.0159521	1.80506	0.00167969
FLJ31485	hypothetical gene supported by AK056047; AK056281; AK123838	AI803208	239569_at	0.784232	0.0982705	1.57058	0.00328464
GRIK3	glutamate receptor, ionotropic, kainate 3	N66584	230593_at	0.703226	0.00679309	2.07153	0.00256191
GGTLC1	gamma-glutamyltransferase light chain 1	L20492	211416_x_at	1.03708	0.81869	1.7258	0.0693849
GLE1	GLE1 RNA export mediator homolog (yeast)	NM_001499	206921_at	1.14112	0.456521	1.37689	0.085808
---	---	BE857355	231165_at	0.678539	0.0188973	1.35455	0.0398582
HOXD8	homeobox D8	BF057634	231906_at	1.04456	0.526719	1.28146	0.0665252
---	---	AI377221	242736_at	0.99417	0.892478	1.27351	0.000816376
SERHL /// SERHL2	serine hydrolase-like /// serine hydrolase-like 2	AL590118	217276_x_at	0.923435	0.416698	1.53308	0.0108537
PCDH17	protocadherin 17	AU119437	227289_at	6.04857	0.000150752	2.06687	0.0057566
ANKRD23	CDNA FLJ35245 fis, clone PROST2002897, moderately similar to Oryctolagus cuniculus CARP mRNA	AI866797	230384_at	1.58571	0.00661078	1.45842	0.0102042
---	---	AA133285	230383_x_at	1.35608	0.0231519	1.48754	0.00815837
VASN	vasorin	BE741869	225867_at	1.27488	0.0537621	1.79465	0.000803318
PPM1H	CDNA FLJ35346 fis, clone PROST2016684	BC040177	1558654_at	0.956584	0.512786	1.42379	0.0739718
FLJ38717	FLJ38717 protein	AK096036	1559964_at	0.863038	0.219938	1.46904	0.127076
---	---	AK025048	1565705_x_at	0.971695	0.688207	1.34305	0.123153
---	---	BE674964	242143_at	0.884917	0.527187	1.34294	0.0177021
NCRNA00085	non-protein coding RNA 85	AA725913	227992_s_at	0.969811	0.816411	2.06681	0.000247917
STK17B	serine/threonine kinase 17b	NM_004226	205214_at	3.34117	8.39509e-06	1.66319	0.0690116
---	---	AI380514	241786_at	0.804603	0.184033	1.60157	0.0153823
C4orf31	chromosome 4 open reading frame 31	NM_024574	219747_at	1.54112	0.00134386	1.54669	0.00235594
---	---	AW206419	230278_at	2.20862	0.0956255	1.33695	0.00476813
GP1BB /// SEPT5	glycoprotein Ib (platelet), beta polypeptide /// septin 5	NM_000407	206655_s_at	0.86109	0.344624	1.65076	0.00504258
SOAT2	sterol O-acyltransferase 2	AF059203	210677_at	1.12299	0.0247494	1.56473	0.0690966
---	---	AI028528	241804_at	1.06022	0.345943	1.26797	0.0556214
CALD1	caldesmon 1	AA705063	243084_at	1.50214	0.0946608	1.56187	0.0248025
RNF182	ring finger protein 182	AI884906	230720_at	3.2828	0.0018782	1.83165	8.20182e-05
LTB4R	leukotriene B4 receptor	AW206817	236172_at	1.65365	0.0506105	1.61426	0.012498
LOC100134229	hypothetical protein LOC100134229	AK026372	232579_at	1.1317	0.0395127	2.0663	1.03661e-05
CRABP2	cellular retinoic acid binding protein 2	NM_001878	202575_at	0.754855	0.0707019	2.06574	0.0212552
---	---	BF110534	230233_at	1.47204	0.0653437	2.06571	0.00539089
---	---	AI123416	227591_at	1.99309	0.00119762	2.06222	9.20155e-05
DKFZP434L187	CDNA clone IMAGE:5022014	AA889613	230861_at	0.877329	0.418209	1.60222	0.0223117
PRTG	protogenin homolog (Gallus gallus)	AK098622	1562590_at	1.13146	0.161106	1.41681	0.0216351
CADM4	cell adhesion molecule 4	AC005525	215259_s_at	1.16827	0.458573	1.54039	0.0410297
---	---	AI673025	230267_at	1.12896	0.3862	1.60334	0.00547375
PSMD9	proteasome (prosome, macropain) 26S subunit, non-ATPase, 9	BC002383	209334_s_at	2.00325	0.000860243	1.70803	0.00204106
THRB	thyroid hormone receptor, beta (erythroblastic leukemia viral (v-erb-a) oncogene homolog 2, avian)	BF431989	229657_at	1.11657	0.354826	1.75374	0.000234942
FYTTD1	forty-two-three domain containing 1	BG291550	224642_at	2.04784	6.05348e-05	1.77952	0.122429
---	---	AI970144	242806_at	1.18795	0.0101773	1.92399	0.000303541
SCML1	sex comb on midleg-like 1 (Drosophila)	BF001786	222747_s_at	0.713011	0.100425	1.99591	6.68546e-05
RPAIN	CDNA FLJ55061 complete cds, highly similar to RPA-interacting protein	AK098491	1556088_at	0.962995	0.801487	1.63621	0.0171637
---	---	AI683911	242452_at	0.493719	0.000889593	1.87167	0.0106339
MFI2	antigen p97 (melanoma associated) identified by monoclonal antibodies 133.2 and 96.5	BC001875	223723_at	0.743649	0.0406161	1.61615	0.0011015
PRKCD	protein kinase C, delta	NM_006254	202545_at	0.931663	0.421258	1.89979	0.00053516
COL5A1	collagen, type V, alpha 1	N30339	212488_at	3.50039	6.34577e-06	1.88257	0.00226078
---	---	AK026914	233648_at	0.983746	0.858403	1.33559	0.0555438
ARHGAP29	Rho GTPase activating protein 29	AL833445	1560318_at	1.36766	0.374792	1.32312	0.0553895
PCDH20	protocadherin 20	AA040057	232054_at	1.43066	0.00445003	1.27128	0.00160229
---	---	AA830854	236322_at	0.884629	0.506149	1.4173	0.110028
ATP13A5	ATPase type 13A5	AW444437	243585_at	1.13647	0.0467377	1.22361	0.0492718
HEG1	HEG homolog 1 (zebrafish)	AA121502	212822_at	1.72104	0.000122004	1.99814	7.95635e-05
---	---	AA838727	238896_at	0.729611	0.00297977	1.97274	0.00214839
RUNX2	runt-related transcription factor 2	AL353944	232231_at	4.97084	0.0151007	2.06175	0.000982467
TGFB3	transforming growth factor, beta 3	J03241	209747_at	1.32633	0.0597122	1.57867	0.0606784
MEGF11	multiple EGF-like-domains 11	NM_032445	1552439_s_at	1.17411	0.239609	1.34488	0.0645105
TTC30B	tetratricopeptide repeat domain 30B	AW117691	243413_at	1.50649	0.03538	1.37992	0.0397862
NAT12	CDNA FLJ50785 complete cds	N36798	228322_at	1.1748	0.0250388	1.24601	0.00827607
CCDC148	coiled-coil domain containing 148	BF940211	231504_at	1.25338	0.0489535	1.27939	0.0505009
CALD1	caldesmon 1	NM_018495	205525_at	1.93783	0.00535583	1.4966	0.00237458
---	---	BE221394	231494_at	1.05589	0.58318	1.20738	0.150603
TRA@ /// TRAC /// TRAJ17 /// TRAV20 /// TRD@	T cell receptor alpha locus /// T cell receptor alpha constant /// T cell receptor alpha joining 17 /// T cell receptor alpha variable 20 /// T cell receptor delta locus	AW966434	215524_x_at	1.0346	0.342966	1.25996	0.0454802
TSPAN12	tetraspanin 12	AI056699	230626_at	2.06277	0.000287508	1.90226	0.000653028
LOC729799	similar to SEC14-like 1 (S. cerevisiae)	AV761014	217667_at	1.93229	0.00383372	1.53575	0.0436351
LRRC4B	leucine rich repeat containing 4B	BE858258	239320_at	0.949228	0.467627	1.31019	0.0738513
PITPNA	phosphatidylinositol transfer protein, alpha	H15647	201190_s_at	1.0396	0.342545	2.06146	0.000194742
ZNF83	zinc finger protein 83	AI831874	236429_at	1.22006	0.49846	1.73478	0.04133
CREB5	cAMP responsive element binding protein 5	NM_004904	205931_s_at	2.66695	0.0509156	1.70339	2.43302e-05
KIAA0040	KIAA0040	NM_014656	203144_s_at	1.63517	0.00136614	1.51301	0.0210305
---	---	BG252802	229641_at	0.619322	0.00078762	1.38989	0.00103311
LOC100131176	CDNA FLJ38667 fis, clone HLUNG2006843	AK095986	1560147_at	0.680495	0.171365	1.48072	0.0183454
---	---	AI926924	239253_at	1.54512	0.0225056	1.41338	0.0343133
ABCG1	ATP-binding cassette, sub-family G (WHITE), member 1	U34919	211113_s_at	1.03778	0.396917	1.42711	0.169964
---	---	AA864758	244149_at	1.09649	0.601992	1.52797	0.0483325
PLEKHG4B	pleckstrin homology domain containing, family G (with RhoGef domain) member 4B	BG026457	236255_at	1.19431	0.0862783	1.8331	0.00196766
BOLA1	bolA homolog 1 (E. coli)	NM_016074	219345_at	0.94353	0.544783	1.35742	0.00876743
RXFP1	relaxin/insulin-like family peptide receptor 1	NM_021634	1552715_a_at	1.07876	0.568622	1.18529	0.272293
RWDD2B	RWD domain containing 2B	AF212232	222614_at	0.758678	0.0599481	1.60359	0.0443054
DDX43	DEAD (Asp-Glu-Ala-Asp) box polypeptide 43	NM_018665	220004_at	0.989036	0.904571	1.24298	0.0557893
SLC5A3	solute carrier family 5 (sodium/myo-inositol cotransporter), member 3	NM_006933	1553313_s_at	1.45634	0.0626237	1.44462	0.00666212
---	---	AA033699	229111_at	1.16867	0.409924	2.05876	0.00261042
UNC5CL	Unc-5 homolog C (C. elegans)-like, mRNA (cDNA clone MGC:34763 IMAGE:5189247)	AI733001	231008_at	1.03589	0.634804	1.4221	0.00108623
MMP2	Collagenase type IV mRNA, 3' end	AK057680	1566677_at	1.15831	0.228891	1.28535	0.096326
C20orf39	chromosome 20 open reading frame 39	NM_024893	219310_at	0.439068	0.000405126	1.9441	0.000766855
---	---	AW963634	239251_at	1.46932	0.00428065	1.65298	0.000292033
---	---	AL832684	1562454_at	0.889551	0.248285	1.34626	0.124531
TACC1	transforming, acidic coiled-coil containing protein 1	AB029026	217437_s_at	2.56362	7.40336e-05	1.74417	0.000764748
PTPN9	Protein tyrosine phosphatase, non-receptor type 9, mRNA (cDNA clone MGC:9424 IMAGE:3895727)	AL360201	233226_at	0.995935	0.970639	1.31951	0.0173099
FAT3	FAT tumor suppressor homolog 3 (Drosophila)	BC016722	1560490_at	0.830487	0.192953	1.5545	0.00478551
ETV7	ets variant 7	AF218365	224225_s_at	0.958785	0.12222	1.26173	0.0215153
RASL12	RAS-like, family 12	NM_016563	219167_at	1.58111	0.000747246	2.05819	0.000359158
---	---	BF961733	238512_at	2.16624	0.000683133	1.35534	0.000163627
CD1D	CD1d molecule	NM_001766	205789_at	0.557904	0.00974875	1.91102	0.00405238
YAF2	YY1 associated factor 2	NM_005748	206238_s_at	1.29782	0.00408473	1.82972	0.000462667
LOC100131317 /// POU4F1	similar to hCG1781072 /// POU class 4 homeobox 1	L20433	211341_at	1.10697	0.205487	1.33231	0.05712
---	---	AA907029	235601_at	0.688775	0.205227	1.39978	0.169906
TIMP2	TIMP metallopeptidase inhibitor 2	NM_003255	203167_at	1.47365	0.00602977	1.7697	0.0561259
MXD4	MAX dimerization protein 4	AA831438	212347_x_at	1.19118	0.0316313	1.8883	0.00135712
BACH2	BTB and CNC homology 1, basic leucine zipper transcription factor 2	NM_021813	221234_s_at	1.43	0.0104	1.62842	0.0202052
BCL6	B-cell CLL/lymphoma 6	S67779	215990_s_at	1.57544	0.0217437	1.42981	0.0642315
---	---	AI733470	240821_at	1.01074	0.757106	1.2112	0.00447871
---	---	BE467566	236982_at	1.08951	0.28698	1.60336	0.00107542
NKAIN4	Na+/K+ transporting ATPase interacting 4	AI569665	230771_at	0.763549	0.00663712	1.6092	0.0103469
ATP9A	ATPase, class II, type 9A	AB014511	212062_at	1.40574	0.00192002	1.89857	0.000673948
LOC54492	neuralized-2	AK026748	225355_at	0.467238	8.68402e-05	1.88077	0.000121302
---	---	AK025503	232273_at	0.950036	0.432062	1.42293	0.0014043
MEGF9	multiple EGF-like-domains 9	W68084	212830_at	0.874	0.00255292	1.86551	0.00828726
---	---	AV700891	222303_at	1.48554	0.102658	1.75629	0.00309604
COLEC12	collectin sub-family member 12	NM_030781	221019_s_at	1.01379	0.856737	2.05713	0.00140803
LOC100132969 /// TMEM185A	hypothetical protein LOC100132969 /// transmembrane protein 185A	AW300965	227880_s_at	1.53278	0.0180167	2.05702	0.0163355
---	---	AI123399	239571_at	0.65985	0.00891806	1.48433	0.0545872
---	---	AA284248	1559394_a_at	0.616061	0.0680755	1.8394	0.0243965
IL5	interleukin 5 (colony-stimulating factor, eosinophil)	NM_000879	207952_at	1.06319	0.328019	1.2259	0.0213453
---	---	AI703186	237936_at	1.0447	0.742341	1.31698	0.00894323
KIAA1305	KIAA1305	NM_025081	220911_s_at	1.17457	0.0145567	2.05666	0.00493235
THRAP3	thyroid hormone receptor associated protein 3	AW082726	242163_at	0.894376	0.133612	1.33585	0.0424402
PRR15	proline rich 15	AI347918	226961_at	0.762888	0.0524032	1.66602	0.00109832
PPA2	Pyrophosphatase (inorganic) 2, mRNA (cDNA clone IMAGE:3863824)	AF086012	1556284_at	1.19043	0.0214256	1.25268	0.0317112
ATOH8	CDNA FLJ90200 fis, clone MAMMA1001615, weakly similar to NEUROGENIC DIFFERENTIATION FACTOR 1	AL831857	1558706_a_at	1.73724	0.0243916	1.41837	0.110896
---	---	AW270170	241262_at	2.51899	0.000880242	1.69895	0.00265169
---	---	BE044588	243191_at	1.3835	0.00529533	1.74517	0.00569078
LOC100130885	hypothetical protein LOC100130885	AI809760	236213_at	0.812539	0.0506154	1.40501	0.00368765
---	---	AFFX-M27830_5	AFFX-M27830_5_at	2.41495	0.0385531	3.22216	0.191663
---	---	N71087	243139_at	1.35352	0.00245573	2.05631	0.00613626
---	---	BC008618	1555117_at	0.904752	0.558418	1.47521	0.0613872
C9orf130	chromosome 9 open reading frame 130	AI337319	227893_at	0.843424	0.113502	1.80124	0.00302552
LOC100128439	hypothetical protein LOC100128439	BC032415	1558447_at	1.10742	0.40347	1.51905	0.00146603
KIAA1522	KIAA1522	AB040955	224746_at	0.788008	0.0138217	2.054	8.20238e-05
LOC730057	Homo sapiens, clone IMAGE:5759975, mRNA	AU147726	233113_at	0.986671	0.935438	1.28299	0.116095
---	---	AI692624	1556352_at	0.847268	0.494159	1.50498	0.0552466
TJP3	tight junction protein 3 (zona occludens 3)	NM_014428	213412_at	0.604302	0.00430501	1.712	0.00639241
KHDRBS3	KH domain containing, RNA binding, signal transduction associated 3, mRNA (cDNA clone MGC:45200 IMAGE:5537585)	AI650382	230249_at	6.6768	3.11301e-05	1.47963	0.0137205
CRYGS	crystallin, gamma S	AF161703	223644_s_at	1.56641	0.0795565	1.4162	0.0171328
GMIP	GEM interacting protein	NM_016573	218913_s_at	1.32903	0.00152158	1.70361	0.0167558
---	---	N21233	238141_s_at	0.876603	0.417845	1.54182	0.00465057
---	---	N25555	236660_at	1.16836	0.179738	1.32549	0.0467164
EML6	echinoderm microtubule associated protein like 6	AA236463	229656_s_at	2.28367	0.00238808	1.41143	0.0375309
A2M	alpha-2-macroglobulin	NM_000014	217757_at	1.39865	0.0266849	1.38555	0.0781412
---	---	AA703326	241863_x_at	1.01049	0.649785	1.45716	0.0878595
---	---	AA682595	240606_at	1.02079	0.821949	1.30876	0.183668
FAM184A	family with sequence similarity 184, member A	AJ420563	1558523_at	1.40687	0.00677942	1.51195	0.0496467
BNC1	basonuclin 1	NM_001717	206581_at	2.47323	0.0243409	1.29324	0.113482
ADCY7	adenylate cyclase 7	NM_001114	203741_s_at	1.53653	0.00236557	1.51129	0.00302629
---	---	W03242	226365_at	0.764395	0.168639	1.65496	0.0118743
DUSP18	dual specificity phosphatase 18	BC004110	227098_at	1.15719	0.0121734	1.61827	0.0414496
GRK5	G protein-coupled receptor kinase 5	NM_005308	204396_s_at	3.9164	0.000273273	1.7327	0.00734787
PDXDC1	pyridoxal-dependent decarboxylase domain containing 1	AI133523	1560013_at	0.81937	0.418865	1.49302	0.0243901
LIPJ	lipase, family member J	BC042900	1569874_s_at	1.11655	0.0342125	1.21448	0.0295544
SCML1	sex comb on midleg-like 1 (Drosophila)	NM_006746	218793_s_at	0.713157	0.0181781	1.95698	0.000276439
---	---	AK026294	234162_at	1.04051	0.610132	1.45565	0.00155802
LOC100132279 /// WTAP	hypothetical protein LOC100132279 /// Wilms tumor 1 associated protein	BF679507	1560274_at	0.948039	0.601632	1.29299	0.184166
CADPS	Ca++-dependent secretion activator	BE467579	239884_at	0.881276	0.552915	1.47778	0.0677107
---	---	AW166562	244241_x_at	1.05529	0.573775	1.26599	0.213083
---	---	AI082004	236610_at	0.94965	0.710393	1.34741	0.0758127
THBS3	thrombospondin 3	L38969	209561_at	1.29982	0.0126763	1.82583	0.00148894
MITF	microphthalmia-associated transcription factor	AL117653	226066_at	8.35527	4.94465e-06	1.52415	0.00517474
FLRT3	fibronectin leucine rich transmembrane protein 3	NM_013281	219250_s_at	3.63334	0.0478075	1.97335	0.00144255
SIAH1	seven in absentia homolog 1 (Drosophila)	BE676461	232365_at	0.90502	0.501556	1.37603	0.036558
---	---	AI023335	240558_at	1.05394	0.367761	1.25524	0.0957952
LIMCH1	LIM and calponin homology domains 1, mRNA (cDNA clone MGC:16598 IMAGE:4110496)	AI494113	241459_at	0.978031	0.71443	1.30389	0.0425649
LOC254057	hypothetical protein LOC254057	AI635756	232370_at	0.799998	0.0204201	1.65075	0.00628557
SHB	Src homology 2 domain containing adaptor protein B	NM_003028	204657_s_at	1.95239	3.67713e-05	1.79689	0.00354483
DFNB59	deafness, autosomal recessive 59	AA744520	235365_at	0.840313	0.217064	2.05225	0.000608888
NOD1	nucleotide-binding oligomerization domain containing 1	NM_006092	221073_s_at	1.49406	0.000899313	1.90754	0.0122364
SYNGR1	synaptogyrin 1	BF511590	213854_at	1.21696	0.115124	1.65969	0.0001415
---	---	AI266750	237169_at	1.65331	0.0113521	1.39981	0.0582651
C12orf68	chromosome 12 open reading frame 68	AI971535	229626_at	1.07609	0.592369	1.57505	0.0074644
MGC12488	hypothetical protein MGC12488	BC005372	211386_at	0.656556	0.0416584	1.44701	0.0972902
LOC100128443 /// MAST4	hypothetical protein LOC100128443 /// microtubule associated serine/threonine kinase family member 4	AI922968	225611_at	2.17142	3.8724e-06	1.69619	0.000247215
---	---	AI684831	244243_at	0.904043	0.328626	2.05122	0.00680197
EME2	essential meiotic endonuclease 1 homolog 2 (S. pombe)	BC041011	1569867_at	1.91802	0.00407957	1.48787	0.00351881
PDE11A	phosphodiesterase 11A	AB038041	224224_s_at	1.00007	0.99867	1.22189	0.114269
MATN3	matrilin 3	NM_002381	206091_at	1.78474	0.0562789	1.30308	0.00138301
---	---	N52773	239425_at	0.935885	0.589757	1.36401	0.0212942
LOC284454	hypothetical protein LOC284454	BU617052	1555847_a_at	1.00277	0.97918	1.65409	0.000117749
NBPF10 /// RP11-94I2.2	neuroblastoma breakpoint family, member 10 /// hypothetical protein LOC200030	AI701905	242191_at	0.639686	0.0389774	1.92127	0.00209898
KCNJ12	potassium inwardly-rectifying channel, subfamily J, member 12	BF237871	232289_at	0.55398	0.000202044	1.81104	0.000368177
ATP5E	ATP synthase, H+ transporting, mitochondrial F1 complex, epsilon subunit	NM_006886	217801_at	1.42218	0.00907553	2.04841	0.000779685
LOC145757	hypothetical LOC145757	AK056534	1558649_at	0.820403	0.0315864	1.33246	0.00501682
MFAP4	microfibrillar-associated protein 4	R72286	212713_at	0.290749	1.52612e-06	1.93964	0.0477974
---	---	BF058422	226311_at	0.707176	0.0134977	1.70488	0.00483128
NOL4	nucleolar protein 4	NM_003787	206045_s_at	3.19936	0.000318089	1.37744	0.0329685
---	---	BE675745	236572_at	1.11573	0.3201	1.37552	0.0233397
TRIM62	tripartite motif-containing 62	R71157	58308_at	0.932961	0.0324926	1.89778	0.000306872
---	---	AI949081	241410_at	0.625278	0.0423626	1.59803	0.0109062
LRRFIP1	LRR FLI-I interacting protein 1 (LRRFIP1)	AA262583	238534_at	0.927479	0.417129	1.43307	0.172136
---	---	BE742377	238568_s_at	1.26751	0.14746	1.35684	0.0447424
---	---	N59650	244265_at	0.853968	0.364304	1.41642	0.0942449
RAB37	RAB37, member RAS oncogene family	R62453	228113_at	0.786707	0.000161936	1.33337	0.25171
AOF2	amine oxidase (flavin containing) domain 2	CA306222	1555897_at	0.994823	0.970424	1.4344	0.021103
PAQR8	progestin and adipoQ receptor family member VIII	AI655524	227626_at	0.626983	2.74935e-05	1.91763	0.0284144
LOC285147	hypothetical protein LOC285147	AW195071	236166_at	1.04634	0.664764	1.31182	0.0293359
---	---	BC041826	1562543_at	1.14643	0.042327	1.22041	0.0322405
MAP7D2	MAP7 domain containing 2	AW237462	228262_at	2.25783	1.35036e-05	1.93441	0.000236527
CADM1	cell adhesion molecule 1	AI627453	244345_at	0.990989	0.924586	1.28863	0.134399
RGMB	RGM domain family, member B	AW004714	242450_at	1.5025	0.00591011	2.04528	0.00127399
---	---	BU626388	1568907_at	1.74745	0.0028394	1.44836	0.00276342
MTSS1L	metastasis suppressor 1-like	AA829283	1555894_s_at	1.31109	0.00212273	1.80046	0.118655
RTN4	reticulon 4	CA428769	1556049_at	1.54685	0.0556615	1.75189	0.00299893
KIAA1045	KIAA1045	AB028968	37566_at	0.777592	0.00164731	1.34794	0.0285907
OSBPL5	oxysterol binding protein-like 5	AL136918	223464_at	0.756776	0.0246037	1.82319	0.0103142
FGF18	fibroblast growth factor 18	NM_003862	206987_x_at	1.27698	0.0574353	2.04432	0.00441676
---	---	BC039490	1561489_at	0.926754	0.254265	1.26764	0.14072
TMEM2	transmembrane protein 2	NM_013390	218113_at	1.03392	0.721267	2.04314	0.000127081
TGFB1I1	transforming growth factor beta 1 induced transcript 1	BC001830	209651_at	1.94359	0.000269709	1.78103	0.00246787
---	---	AI140860	243162_at	0.755608	0.0222747	1.33803	0.141103
SLIT3	slit homolog 3 (Drosophila)	NM_003062	203813_s_at	0.806245	0.0709021	1.46558	0.151486
LPP	Lipoma cell line Li-14/SV40 ectopic sequence from HMGI-C fusion mRNA, 3' sequence, clone pCH108	AI079544	243874_at	1.02875	0.836232	1.39966	0.0716135
UBE2J1	ubiquitin-conjugating enzyme E2, J1 (UBC6 homolog, yeast)	AF161502	222435_s_at	3.91852	0.00913705	2.04295	0.0039289
LOC100130415	similar to PRO2751	AF119896	224030_s_at	0.981694	0.922171	1.49417	0.0997572
CDH6	PREDICTED: Homo sapiens hypothetical protein LOC100128783 (LOC100128783), mRNA	AU150574	232631_at	6.50805	0.0702977	1.53788	0.0148055
SPON1	spondin 1, extracellular matrix protein	AB051390	209437_s_at	1.57444	0.00900568	1.62223	0.00536922
NCAM1	neural cell adhesion molecule 1	AA126505	212843_at	0.575726	1.37121e-05	1.7907	0.000377276
FLJ41603	FLJ41603 protein	BF939317	227717_at	1.69248	0.0379982	1.36914	0.00822046
WDR52	CDNA FLJ37079 fis, clone BRACE2016325	AI346359	230152_at	2.33254	0.00362807	1.46395	0.0224604
ST3GAL6	ST3 beta-galactoside alpha-2,3-sialyltransferase 6	AI989567	213355_at	0.678963	0.00272065	1.90614	0.000293836
COL6A2	collagen, type VI, alpha 2	AY029208	209156_s_at	0.566922	0.00888145	1.87389	0.00125052
FOXO6	forkhead box protein O6	AI341823	239657_x_at	0.716236	0.00335164	1.94533	0.00012402
---	---	AA588092	239723_at	0.972115	0.804667	1.23782	0.11936
GALNT10	UDP-N-acetyl-alpha-D-galactosamine:polypeptide N-acetylgalactosaminyltransferase 10 (GalNAc-T10)	BE906572	212256_at	1.83561	0.000204421	1.82448	0.000351628
---	---	BF346665	226125_at	0.569413	0.00111704	1.76867	0.000809631
---	---	BE671251	239544_at	1.3774	0.0116604	1.34898	0.01591
---	---	AW043836	239423_at	1.96355	0.00776659	1.47019	0.0643372
---	---	AK024907	234650_at	0.754195	0.0014921	1.25068	0.0632985
ELOVL3	elongation of very long chain fatty acids (FEN1/Elo2, SUR4/Elo3, yeast)-like 3	AF292387	234513_at	1.20204	0.13636	1.4002	0.129772
ZNF70	Zinc finger protein 70, mRNA (cDNA clone MGC:48959 IMAGE:5551072)	N62996	243816_at	1.2216	0.139413	1.46658	0.0089809
MRC2	mannose receptor, C type 2	AB014609	37408_at	0.78376	0.00108106	2.04178	0.000183496
---	---	AI953395	244846_at	0.937113	0.613734	1.34724	0.0331646
VAMP5	vesicle-associated membrane protein 5 (myobrevin)	NM_006634	204929_s_at	2.48273	3.75255e-06	2.04026	0.000929658
C9orf16	chromosome 9 open reading frame 16	AK022885	222166_at	1.17833	0.21733	1.51201	0.0747111
EID3	EP300 interacting inhibitor of differentiation 3	AI964053	231292_at	2.13664	0.00503094	1.23172	0.0217021
PLK2	polo-like kinase 2 (Drosophila)	NM_006622	201939_at	17.1178	5.89265e-07	1.77355	0.00158087
ABHD7	abhydrolase domain containing 7	AI807532	239579_at	10.8906	0.00682446	1.32176	0.177645
LOC100131419	hypothetical protein LOC100131419	BC020925	1563228_x_at	0.831515	0.152152	1.45391	0.0504074
---	---	AL831870	1564937_at	0.972465	0.778955	1.22615	0.0655251
---	---	AI251870	240262_at	0.896069	0.342105	1.31725	0.248237
ZNF804A	zinc finger protein 804A	AF052145	215767_at	2.13638	0.0149112	1.24969	0.0361918
---	---	AI798924	240656_at	1.02781	0.803168	1.3972	0.09307
MFAP3L	microfibrillar-associated protein 3-like	NM_021647	205442_at	1.6876	0.000413135	1.78856	0.00020213
ELF3	E74-like factor 3 (ets domain transcription factor, epithelial-specific )	AF017307	201510_at	1.2525	0.000292478	1.65769	0.0265428
ADAM18	ADAM metallopeptidase domain 18	BC034624	1568970_at	2.05036	0.0588876	2.0369	0.000885981
---	---	AL713719	1562898_at	0.974592	0.682093	1.2202	0.100755
LPAR1	lysophosphatidic acid receptor 1	AW269335	204036_at	1.61272	0.0106467	1.79866	0.00095578
---	---	BC003629	210230_at	1.28351	0.152026	1.73986	0.000624526
---	---	BF109370	239978_at	0.946718	0.783688	1.34785	0.0315481
---	---	N72610	239886_at	0.925309	0.569712	1.40445	0.0630994
LY75	lymphocyte antigen 75	NM_002349	205668_at	1.07468	0.560982	1.2293	0.211027
LHX1	LIM homeobox 1	NM_005568	206230_at	0.935636	0.194256	1.50067	0.0122105
WDR78	WD repeat domain 78	NM_024763	220769_s_at	1.45596	0.00156525	1.28859	0.0227757
HOXC13	homeobox C13	NM_017410	219832_s_at	0.554285	0.0321195	1.69508	5.01818e-05
ENPP2	ectonucleotide pyrophosphatase/phosphodiesterase 2	D45421	210839_s_at	2.23441	0.0027666	1.6079	0.0108386
---	---	BF432941	231055_at	1.11836	0.121304	1.37476	0.0487737
MEIS1	Leukemogenic homolog protein (MEIS1)	N50406	242172_at	1.23535	0.219594	1.28137	0.0988117
FAM107B	family with sequence similarity 107, member B	AL136885	223058_at	1.69848	0.00259192	1.99417	0.00265456
---	---	AF086400	1561123_at	0.945649	0.571032	1.21646	0.00446537
---	---	AA629668	242797_x_at	0.981671	0.813263	1.33745	0.0678393
---	---	BF476152	235613_at	0.659644	0.0216876	1.30975	0.0249335
ARMETL1	arginine-rich, mutated in early stage tumors-like 1	BC037872	1568696_at	1.07739	0.210578	1.24864	0.13059
THRB	thyroid hormone receptor, beta (erythroblastic leukemia viral (v-erb-a) oncogene homolog 2, avian)	BG494007	228716_at	1.54254	7.5638e-05	1.96162	0.000407718
FLJ13439	hypothetical gene supported by AK023501	AK023501	233077_at	1	0.999948	2.03568	0.00542533
OCA2	oculocutaneous albinism II	NM_000275	206498_at	1.3645	0.000540233	1.71319	0.00514752
C21orf34	chromosome 21 open reading frame 34	BM194465	1559901_s_at	1.37872	0.000646356	1.22404	0.0133824
DKFZp434H1419	hypothetical protein DKFZp434H1419	AL137534	214717_at	2.31461	0.000358007	1.76307	0.00928072
---	---	BF056892	229024_at	0.896407	0.132249	1.77952	0.0351295
KCND1	potassium voltage-gated channel, Shal-related subfamily, member 1	NM_004979	206842_at	2.01139	0.00953022	1.49049	0.0311408
CRYBA2	crystallin, beta A2	NM_005209	220136_s_at	1.04974	0.581814	1.28525	0.0234671
RIMBP2	RIMS binding protein 2	AB002316	214811_at	2.36436	0.00550356	1.64662	0.0297216
LOC100129455	hypothetical LOC100129455	AK092134	1560475_at	1.06155	0.487014	1.22978	0.153883
hCG_1730474	HCG1730474, mRNA (cDNA clone MGC:189748 IMAGE:9057072)	AK000995	215349_at	0.892294	0.650806	1.3247	0.176708
FOLH1	folate hydrolase (prostate-specific membrane antigen) 1	NM_004476	205860_x_at	0.88752	0.0572166	1.32208	0.0544117
DCHS1	dachsous 1 (Drosophila)	NM_024542	218892_at	0.681883	0.0350909	1.59766	0.000144961
LOC728052	similar to hCG2031213	AL833240	1558795_at	1.31566	0.184018	1.29296	0.0610308
---	---	AW590838	242920_at	0.726139	0.0614804	1.39372	0.0416421
CDH11	cadherin 11, type 2, OB-cadherin (osteoblast)	AI038737	239286_at	1.0129	0.894718	1.31264	0.0645443
PMEPA1	prostate transmembrane protein, androgen induced 1	AL035541	222450_at	0.576504	0.00538359	2.03562	0.00204679
C1orf104	chromosome 1 open reading frame 104	NM_173639	1552862_at	1.01606	0.89954	1.41931	0.0524723
SLC24A6	solute carrier family 24 (sodium/potassium/calcium exchanger), member 6	NM_024959	218749_s_at	1.2193	0.214433	1.67402	0.00042751
---	---	AA665058	242310_at	0.542346	0.0756074	1.72138	0.0213229
---	---	BF432461	240756_at	0.899724	0.266684	1.42216	0.206006
---	---	BF115793	236346_at	1.39912	0.0966423	1.76627	0.0071726
---	---	BC037807	1557232_at	0.792874	0.0495362	1.55953	0.0132475
---	---	AA863112	235999_at	0.736607	0.0229077	1.2881	0.0873743
---	---	AW298119	241775_at	0.967826	0.863665	1.30979	0.128049
AMY1A /// AMY1B /// AMY1C /// AMY2A /// AMY2B	amylase, alpha 1A (salivary) /// amylase, alpha 1B (salivary) /// amylase, alpha 1C (salivary) /// amylase, alpha 2A (pancreatic) /// amylase, alpha 2B (pancreatic)	NM_004038	208498_s_at	0.927478	0.218525	1.21081	0.0161935
LRRN3	leucine rich repeat neuronal 3	AL442092	209841_s_at	1.61402	0.0045967	1.58254	0.00307515
NRK	Nik related kinase	Z83850	232771_at	1.8751	0.0327131	1.34582	0.0438885
40427	septin 6	AK026589	213666_at	0.9093	0.171005	2.03508	4.98966e-06
KIAA1539	KIAA1539	NM_025182	207765_s_at	2.11187	0.000635396	1.624	0.00227374
---	---	AW850555	239830_at	0.7317	0.0252658	1.37999	0.0700156
ST3GAL1	ST3 beta-galactoside alpha-2,3-sialyltransferase 1	AV721528	225033_at	1.25958	0.209107	1.80519	0.0202438
C9orf9	chromosome 9 open reading frame 9	NM_018956	220050_at	0.87282	0.240725	1.55822	0.0272024
DKFZp434L192	hypothetical protein DKFZp434L192	NM_152746	1553898_a_at	1.16534	0.0582767	1.21849	0.0962274
C12orf33	chromosome 12 open reading frame 33	BC028195	1555040_at	1.146	0.293401	1.22038	0.078909
PCDH7	protocadherin 7	NM_002589	205534_at	2.73393	0.000639672	2.03497	0.000626856
C3orf70	chromosome 3 open reading frame 70	AI493909	235562_at	0.784803	0.0241475	1.39869	0.0380676
TRAFD1	Fln29	AI694735	242497_at	1.33573	0.0234261	1.28397	0.0022183
SYNM	synemin, intermediate filament protein	AK026420	212730_at	2.38135	2.70101e-05	1.89234	8.62171e-05
NR2F1	nuclear receptor subfamily 2, group F, member 1	BC004154	209506_s_at	0.988313	0.926142	1.61442	0.0188463
C22:CTA-250D10.9	transmembrane protein 46-like	AW136354	244467_at	0.95411	0.61269	1.32293	0.0286665
---	---	AK022191	233624_at	1.1862	0.0886775	1.37508	0.0150798
SIRT4	sirtuin (silent mating type information regulation 2 homolog) 4 (S. cerevisiae)	AC003982	222248_s_at	0.886921	0.21528	1.49565	0.0325001
SLFN5	schlafen family member 5	AI923675	238430_x_at	1.56063	0.199884	1.72983	0.00352
---	---	AL832268	1560706_at	1.17281	0.128033	1.27202	0.117406
CC2D1A	coiled-coil and C2 domain containing 1A	AK023399	222137_at	0.654943	0.0108077	1.45526	0.0141865
---	---	AI927692	228528_at	0.754446	0.149133	1.31895	0.248294
FBLN7	fibulin 7	BE677799	229247_at	0.972274	0.796236	1.44996	0.0278786
CRIP1	cysteine-rich protein 1 (intestinal)	NM_001311	205081_at	1.03325	0.246596	1.86793	1.41707e-05
CCDC57	coiled-coil domain containing 57	NM_152675	1553248_at	0.850154	0.208065	1.51746	0.0118833
CHI3L1	chitinase 3-like 1 (cartilage glycoprotein-39)	M80927	209396_s_at	0.989985	0.944298	1.54562	0.00484009
TACC1	transforming, acidic coiled-coil containing protein 1	BE676272	242290_at	1.06686	0.645399	1.34915	0.0295168
C15orf37	chromosome 15 open reading frame 37	AK091107	1556588_at	1.21034	0.011465	1.51349	0.0377492
PARVA	parvin, alpha	AK022316	215418_at	0.91316	0.466155	1.36979	0.00243235
LOC338758	hypothetical protein LOC338758	AI377324	238893_at	0.739282	0.0635732	1.6478	0.0238737
SOX11	SRY (sex determining region Y)-box 11	AI360875	204913_s_at	0.561855	0.000226229	1.94424	0.00668537
MYL9	myosin, light chain 9, regulatory	NM_006097	201058_s_at	0.680196	0.00876929	1.85774	0.000590844
EPM2AIP1	EPM2A (laforin) interacting protein 1	BF432224	227847_at	1.46544	0.00443906	1.86827	0.00548658
AFF4	AF4/FMR2 family, member 4	N59653	232865_at	0.905458	0.428719	1.60109	0.0209473
---	---	AA069425	237377_at	0.952719	0.760586	1.43491	0.0293804
CADM3	cell adhesion molecule 3	AI564838	213948_x_at	2.81218	0.0297137	1.65281	0.00515881
LOC401577	hypothetical protein LOC401577	AK023533	232172_at	6.02628	6.45416e-05	1.63647	0.00148397
---	---	AI703321	231227_at	0.961075	0.825526	1.50904	0.0757983
CXorf57	chromosome X open reading frame 57	NM_018015	219355_at	0.761289	0.013403	1.89507	0.00011505
RUNDC3B	RUN domain containing 3B	AI928037	241703_at	1.10537	0.469495	1.26985	0.126467
LOC100129899	hypothetical protein LOC100129899	AW134523	238771_at	1.19175	0.258833	1.45994	0.00149876
RNASE4	ribonuclease, RNase A family, 4	NM_002937	205158_at	1.1721	0.0234988	1.27698	0.0182301
C14orf43	chromosome 14 open reading frame 43	AV740879	225980_at	1.17706	0.0279156	1.68682	0.00312417
NPAS4	neuronal PAS domain protein 4	AB049469	1554299_at	1.43934	0.00294171	1.30835	0.032045
TARP /// TRGC2	TCR gamma alternate reading frame protein /// T cell receptor gamma constant 2	M13231	215806_x_at	16.0513	0.00501761	1.28844	0.0792336
KRT17	keratin 17	Z19574	212236_x_at	1.6824	0.00246472	1.61662	0.0049596
OR2M4	olfactory receptor, family 2, subfamily M, member 4	X89666	1566288_at	1.10461	0.109697	1.20503	0.0547193
MYOCD	myocardin	AI452798	237206_at	3.2759	0.119414	1.35798	0.0322301
---	---	AA632049	1557270_at	0.849973	0.365671	1.7017	0.00814109
LSAMP	limbic system-associated membrane protein	NM_002338	214460_at	2.50523	0.00075938	1.66731	0.000806934
AAK1	AP2 associated kinase 1	AW451954	205434_s_at	1.21666	0.0665409	2.03424	0.000278026
BCL2L11	BCL2-like 11 (apoptosis facilitator)	AF455755	1555372_at	0.910175	0.540244	1.6194	0.0118096
LOC644242	Hypothetical protein LOC644242, mRNA (cDNA clone IMAGE:4403366)	BC015390	1558404_at	2.06867	0.0044651	1.79333	0.00207176
SORCS2	sortilin-related VPS10 domain containing receptor 2	AB037750	228720_at	1.06353	0.142899	1.66696	0.00117039
MGC16121	hypothetical protein MGC16121	BE048571	228235_at	2.40358	0.0145058	2.03299	0.000392538
---	---	AI949912	240013_at	1.6909	0.0426583	1.31646	0.0237908
PCSK6	PACE4A-II	AI056815	242662_at	0.677199	0.00479143	1.40375	0.00148122
---	---	BC017507	1558418_at	0.765824	0.134221	1.41787	0.170149
FBXO2	F-box protein 2	NM_012168	219305_x_at	1.06398	0.324468	1.8271	0.000209995
LIFR	leukemia inhibitory factor receptor alpha	AA701657	225571_at	0.957858	0.815113	2.03175	0.00254819
TLE3	transducin-like enhancer of split 3 (E(sp1) homolog, Drosophila)	AI567426	212769_at	1.71924	0.00906261	1.7942	0.0019854
C11orf63	chromosome 11 open reading frame 63	NM_024806	220141_at	1.17895	0.0978334	1.29437	0.151402
AMIGO2	adhesion molecule with Ig-like domain 2	AC004010	222108_at	2.82679	0.000272858	1.77823	0.00832846
LOC100128288	hypothetical protein LOC100128288	AK094860	1559045_at	0.916349	0.210332	1.23483	0.131909
---	---	BC031345	1570249_x_at	0.916526	0.529976	1.34154	0.0163269
S100A8	S100 calcium binding protein A8	NM_002964	202917_s_at	1.43997	0.0334694	1.37167	0.21674
TOM1L2	target of myb1-like 2 (chicken)	AV751731	226198_at	1.45338	0.00456528	1.51628	0.0295649
SLC40A1	solute carrier family 40 (iron-regulated transporter), member 1	AL136944	223044_at	1.01032	0.915823	1.59715	0.0233726
FLJ42957	FLJ42957 protein	AI821565	237591_at	0.507224	0.00123152	1.72703	0.00396343
---	---	W86659	240594_at	0.93536	0.556803	1.3926	0.184533
SOX11	SRY (sex determining region Y)-box 11	AW157202	204914_s_at	0.365947	0.000120781	2.03147	0.000268179
EDNRA	endothelin receptor type A	NM_001957	204464_s_at	0.29861	8.0107e-05	1.77439	0.0479378
---	---	BC041947	1561448_at	1.10411	0.330355	1.31816	0.198383
---	---	AI951144	235123_at	0.894184	0.286969	1.69227	0.00176931
SERTAD4	CDNA FLJ39062 fis, clone NT2RP7013999	R81445	233907_s_at	0.546493	0.0067054	1.66367	0.00019726
---	---	AI301081	1568807_a_at	0.924748	0.206057	1.25702	0.0118623
MDFI	MyoD family inhibitor	NM_005586	205375_at	0.878655	0.0838032	1.92671	0.00144711
---	---	AL833266	1563467_at	1.0672	0.160858	1.23176	0.0225177
ATXN1	ataxin 1	AW235612	203231_s_at	1.81465	0.098749	1.39375	0.000491067
---	---	BC018690	1570349_at	0.993013	0.961112	1.31846	0.132053
BCL9L	B-cell CLL/lymphoma 9-like	BG481877	227616_at	1.57106	0.00196659	1.67258	0.00204607
DOK7	docking protein 7	AI743416	240633_at	0.888592	0.343722	1.29917	0.111557
---	---	N90870	232113_at	3.29794	0.0879529	1.3218	0.0323622
CDC42EP4	CDC42 effector protein (Rho GTPase binding) 4	AL162074	214721_x_at	0.577552	0.000701784	1.90028	0.0017845
ODZ4	odz, odd Oz/ten-m homolog 4 (Drosophila)	BF112171	213273_at	1.10972	0.230229	1.88519	0.00142407
CDH11	cadherin 11, type 2, OB-cadherin (osteoblast)	NM_001797	207172_s_at	1.07483	0.485183	2.03113	0.00711739
---	---	AI346891	238318_at	1.04165	0.596419	1.2096	0.157358
ZBTB46	zinc finger and BTB domain containing 46	AU156821	227329_at	0.859614	0.174438	1.70531	0.000206512
---	---	AA608834	242068_at	0.637653	0.23393	1.43794	0.122895
---	---	H49481	1559151_at	1.08573	0.331455	1.26407	0.0529725
---	---	AI733037	243379_at	1.06917	0.224078	1.24227	0.0110355
SDK2	sidekick homolog 2 (chicken)	N23651	242064_at	0.884383	0.0361362	1.99543	0.0002053
MCPH1	microcephalin 1	N21605	1557347_at	1.00078	0.991443	1.42181	0.0439653
C7orf44	chromosome 7 open reading frame 44	BC001743	209446_s_at	1.99596	0.000422141	1.77916	0.00774094
RAB11FIP3	Clone 23794 mRNA sequence	BF183535	228613_at	0.599595	0.00344401	1.85	0.00049171
CDH18	cadherin 18, type 2	NM_004934	206280_at	1.03923	0.504887	1.30716	0.0113229
---	---	BG470800	244361_at	1.04647	0.552541	1.42794	0.0186596
RNF150	ring finger protein 150	AA722069	227657_at	1.04837	0.563008	1.71087	0.0513571
NRXN3	neurexin 3	AF123462	215021_s_at	0.935355	0.407377	1.58813	0.000347866
HTRA4	HtrA serine peptidase 4	NM_153692	1553706_at	1.19254	0.111197	1.28896	0.0412755
LOC572558	hypothetical locus LOC572558	H12280	231024_at	0.91423	0.500843	1.48838	0.112864
PTCH1	patched homolog 1 (Drosophila)	AL044175	209816_at	0.396997	0.000212364	1.71973	1.47947e-05
NPAS2	neuronal PAS domain protein 2	AW000928	213462_at	0.874312	0.0353422	1.57031	0.130869
ADAMTS5	ADAM metallopeptidase with thrombospondin type 1 motif, 5	BF060767	229357_at	1.50034	0.0726591	1.27553	0.115253
EGR3	early growth response 3	NM_004430	206115_at	1.66905	0.0776981	1.3638	0.00153366
PDE4D	phosphodiesterase 4D, cAMP-specific (phosphodiesterase E3 dunce homolog, Drosophila)	BF507941	228962_at	1.00955	0.842834	1.25675	0.0647224
CFD	complement factor D (adipsin)	NM_001928	205382_s_at	0.764356	0.0152783	1.42457	0.0227292
---	---	AL042523	230578_at	1.04798	0.52947	1.27505	0.00478453
---	---	BF528429	238734_at	1.22727	0.120071	1.24216	0.0854366
NFRKB	nuclear factor related to kappaB binding protein	AI304853	237210_at	1.494	0.0206917	1.51432	0.00811101
ARL15	ADP-ribosylation factor-like 15	NM_019087	219842_at	0.786257	0.0202891	1.48707	0.00138422
HYDIN /// HYDIN2	hydrocephalus inducing homolog (mouse) /// hydrocephalus inducing homolog 2 (mouse)	AI027184	243354_at	1.36154	0.216756	1.27233	0.0386318
PALM	paralemmin	NM_002579	203859_s_at	0.909092	0.13256	1.86836	0.0497732
ARSD	arylsulfatase D	BC003660	223695_s_at	0.944249	0.353214	1.58919	0.0144461
PDE4A	phosphodiesterase 4A, cAMP-specific (phosphodiesterase E2 dunce homolog, Drosophila)	NM_006202	204735_at	1.57175	0.000657656	2.0308	7.65367e-05
TSPAN12	tetraspanin 12	AI056699	230625_s_at	1.49442	0.00732721	1.62021	0.000315498
CCPG1	cell cycle progression 1	AU144243	214152_at	1.16611	0.150758	1.30288	0.0712823
---	---	AA532745	1558599_at	1.18669	0.443247	1.27228	0.0741166
STK17A	serine/threonine kinase 17a	NM_004760	202695_s_at	2.55225	9.62564e-07	1.63425	0.000505848
SRGAP3	SLIT-ROBO Rho GTPase activating protein 3	AB007871	209794_at	0.946916	0.514092	2.03062	0.0217821
PPP1R16A	protein phosphatase 1, regulatory (inhibitor) subunit 16A	AI742931	225203_at	2.06967	0.000214448	1.66221	0.0089313
EBF1	Early B-cell factor 1, mRNA (cDNA clone MGC:49016 IMAGE:6045572)	AU145682	233261_at	1.01713	0.831468	1.19995	0.103181
---	---	AI479277	235183_at	0.80778	0.145289	1.23027	0.1184
MALAT1	metastasis associated lung adenocarcinoma transcript 1 (non-protein coding)	NM_014086	231735_s_at	2.60968	0.253316	1.507	0.00470581
---	---	AI798724	1556618_at	1.01368	0.871919	1.4475	0.0527199
---	---	BF114967	231067_s_at	1.34354	0.182854	1.39075	0.0111275
ETV3	ets variant 3	NM_005240	1552423_at	1.23553	0.0202721	1.57831	0.00924707
PCDH8	protocadherin 8	NM_002590	206935_at	1.3451	0.0297711	1.81068	0.000690794
USP6	ubiquitin specific peptidase 6 (Tre-2 oncogene)	BC029495	1555065_x_at	1.12776	0.19921	1.30406	0.107916
C14orf118	chromosome 14 open reading frame 118	AB032978	229514_at	0.737549	0.20022	1.44823	0.0383198
---	---	AL050065	216069_at	1.36468	0.238639	1.2662	0.0899048
CASR	calcium-sensing receptor	AI766210	242744_s_at	1.00072	0.994446	1.23739	0.130276
RIN2	Ras and Rab interactor 2	AL136924	209684_at	1.40653	0.00101209	1.66529	0.00122474
COL13A1	collagen, type XIII, alpha 1	NM_005203	208535_x_at	0.737151	0.0351774	1.72723	0.0013602
HR	hairless homolog (mouse)	BF528433	241355_at	1.33331	0.0218172	1.48031	0.05302
---	---	AI692322	238861_at	0.768709	0.0348402	1.39278	0.0499468
---	---	N90377	243031_at	1.22398	0.281047	1.38839	0.0182753
C3orf34	chromosome 3 open reading frame 34	AY099509	1553158_at	1.31893	0.0262556	1.67872	0.000497557
MICALL2	MICAL-like 2	NM_024723	219332_at	3.25477	8.30181e-05	1.69547	0.0162991
COL4A3	collagen, type IV, alpha 3 (Goodpasture antigen)	U02520	216898_s_at	1.075	0.249053	1.22619	0.0518239
ZNF641	zinc finger protein 641	BF541598	235179_at	1.13075	0.401467	1.40175	0.095757
---	---	AA454520	1560148_at	0.796341	0.0562243	1.30439	0.14091
---	---	BQ446762	1557238_s_at	0.497897	0.0284162	1.35563	0.124952
---	---	AA482221	240499_at	0.823954	0.144715	1.38935	0.121735
---	---	AW051597	238133_at	2.86193	6.51758e-05	1.55406	0.0244252
ELFN1	extracellular leucine-rich repeat and fibronectin type III domain containing 1	AI694118	229581_at	1.44134	0.0259544	1.86555	0.00637588
WDR66	WD repeat domain 66	AI479075	230193_at	1.72377	0.00956782	1.2376	0.208058
---	---	BE674528	229327_s_at	0.938077	0.765285	1.68444	0.0302265
LOC646576	hypothetical LOC646576	AA149654	236632_at	0.905599	0.428242	1.54954	0.00528403
HHIP	hedgehog interacting protein	AK098525	1556037_s_at	1.21761	0.0412959	1.29429	0.2094
GPR83	G protein-coupled receptor 83	BE670361	222953_at	2.76473	0.00819166	1.29829	0.036507
PITPNA	phosphatidylinositol transfer protein, alpha	H15647	201191_at	0.986301	0.775234	2.03044	7.63212e-05
CDKN1C	Cyclin-dependent kinase inhibitor 1C transcript variant 3 (CDKN1C) mRNA, complete cds, alternatively spliced	N95363	213183_s_at	0.610919	0.0570679	1.58273	0.00826077
ARHGEF17	Rho guanine nucleotide exchange factor (GEF) 17	NM_014786	203756_at	1.17136	0.1411	1.81476	0.00838102
DGAT2	diacylglycerol O-acyltransferase homolog 2 (mouse)	AW469523	226064_s_at	0.394764	0.000178294	1.68028	0.0216808
CCDC57	coiled-coil domain containing 57	AF007146	214818_at	1.6656	0.0111721	1.41418	0.0456143
---	---	AL110175	233303_at	0.710793	0.167068	1.52565	0.0159287
BTG1	B-cell translocation gene 1, anti-proliferative	AL535380	200920_s_at	2.21091	0.000630124	2.02898	3.06794e-05
EMP1	epithelial membrane protein 1	NM_001423	201324_at	251.286	0.00308317	1.45336	0.0768154
FAM115A	family with sequence similarity 115, member A	BF030508	212981_s_at	1.28731	0.196235	1.82425	0.013242
EXT1	exostoses (multiple) 1	AW189467	230183_at	2.97717	4.40414e-05	1.60712	0.00147652
---	---	AI799128	241873_at	1.23233	0.0431216	1.24842	0.0375007
---	---	AW576443	238726_at	0.753076	0.10701	1.37493	0.19117
PRDM1	CDNA FLJ50887 partial cds, highly similar to PR domain zinc finger protein 1	AW977527	235668_at	1.72912	0.00324548	1.35043	0.0344455
---	---	AL832806	1558385_at	0.84285	0.254384	1.35979	0.0943325
---	---	AI126321	237303_at	1.124	0.157222	1.22423	0.150657
---	---	AI074450	243329_at	0.89228	0.436942	1.35289	0.0377856
---	---	AA705933	239866_at	0.939511	0.394295	1.55549	0.0215988
UBE2J1	ubiquitin-conjugating enzyme E2, J1 (UBC6 homolog, yeast)	NM_016021	217826_s_at	3.81747	0.034035	1.80018	0.00920579
---	---	AI733288	240888_at	1.02642	0.716641	1.29826	0.0678228
IL13RA2	interleukin 13 receptor, alpha 2	NM_000640	206172_at	1.06188	0.664459	1.19382	0.130712
FAM110B	family with sequence similarity 110, member B	AW264082	228790_at	2.34532	0.0496052	1.78795	0.00673065
THBD	thrombomodulin	NM_000361	203887_s_at	1.01817	0.849279	1.2323	0.14583
---	---	AW002876	237034_at	2.04305	0.040731	1.26735	0.0163153
EPC1	EPC1/ASXL2a fusion protein	W93523	238633_at	1.70574	0.0228076	1.41618	0.0624681
CPE	carboxypeptidase E	NM_001873	201117_s_at	4.05317	0.00271205	2.02813	0.000535221
RUNDC3B	RUN domain containing 3B	AI825798	215321_at	1.13889	0.055067	1.21498	0.0600605
TKTL1	transketolase-like 1	X91817	214183_s_at	0.947139	0.581228	1.2979	0.229519
LIFR	leukemia inhibitory factor receptor alpha	AI680541	225575_at	0.740063	0.0351553	1.74863	0.00197026
POLR3GL	polymerase (RNA) III (DNA directed) polypeptide G (32kD)-like	BC004355	223269_at	1.63202	0.00288045	1.75857	0.000702
TACC1	Transforming, acidic coiled-coil containing protein 1 variant TACC1-B (TACC1) mRNA, partial cds; alternatively spliced	AA897191	1557305_at	1.06908	0.300326	1.24427	0.213265
KIAA0427	KIAA0427	NM_014772	204303_s_at	1.60765	0.00184985	1.66661	0.0069294
GRHL2	grainyhead-like 2 (Drosophila)	NM_024915	219388_at	0.968424	0.748996	1.32702	0.0178991
PP14571	similar to hCG1777210	AF070536	214858_at	0.966998	0.738982	1.26278	0.032457
NEBL	nebulette	AI932350	241782_at	0.612477	0.040792	1.28135	0.0803862
RASA3	RAS p21 protein activator 3	AI684746	225562_at	4.86757	4.01761e-06	1.78087	2.19293e-05
RILPL2	Rab interacting lysosomal protein-like 2	AI810244	227983_at	1.16524	0.0631763	1.8908	0.000910391
LYPD6	LY6/PLAUR domain containing 6	AA227842	227764_at	0.907922	0.368112	1.64516	0.00774323
POSTN	periostin, osteoblast specific factor	AY140646	1555778_a_at	11.1957	0.0155358	1.25399	0.0104539
MAN2C1	mannosidase, alpha, class 2C, member 1	AA460970	238089_at	1.04774	0.581314	1.58848	0.0400623
CITED1	Cbp/p300-interacting transactivator, with Glu/Asp-rich carboxy-terminal domain, 1	NM_004143	207144_s_at	0.59114	0.0074832	1.78578	0.00754427
ADRB2	adrenergic, beta-2-, receptor, surface	NM_000024	206170_at	4.10196	0.00156243	1.38213	0.0735293
PSMA3	proteasome (prosome, macropain) subunit, alpha type, 3	AK021499	232648_at	0.960191	0.767738	1.23447	0.0768367
---	---	AK026429	233038_at	0.901842	0.547435	1.27494	0.0595286
C21orf2	MRNA; candidate gene for APECED	AW300217	238965_at	1.35831	0.0026553	1.79978	0.0366133
FOXE1	forkhead box E1 (thyroid transcription factor 2)	NM_004473	206912_at	1.07374	0.677598	1.20411	0.0794686
NDST4	N-deacetylase/N-sulfotransferase (heparan glucosaminyl) 4	NM_022569	208334_at	9.19311	0.000325258	1.30794	0.220458
PDZRN3	PDZ domain containing ring finger 3	AL569804	212915_at	0.904094	0.244792	1.81538	0.000784309
ELF4	E74-like factor 4 (ets domain transcription factor)	NM_001421	203490_at	1.00874	0.883287	1.69723	0.00400652
RHOU	ras homolog gene family, member U	AL096776	223168_at	1.22876	0.0124003	2.02737	0.000507596
AMOT	angiomotin	AF286598	209521_s_at	1.36016	0.0189548	2.02719	0.00327778
PRKD1	protein kinase D1	NM_002742	205880_at	0.616832	0.00117727	1.89698	0.00254401
TTLL7	tubulin tyrosine ligase-like family, member 7	NM_024686	219882_at	2.282	0.00752735	1.62706	0.00432335
MOCS2	molybdenum cofactor synthesis 2	BE467697	236208_at	1.33777	0.00933707	1.64089	0.000773392
PRICKLE2	prickle homolog 2 (Drosophila)	BG285881	225968_at	3.33698	0.000331414	1.67697	0.000319344
---	---	AI732291	243390_at	0.935694	0.226297	1.22369	0.097344
---	---	AU148090	230415_at	0.887611	0.679184	1.49065	0.116971
SLC6A16	CDNA clone IMAGE:5268379	BC039336	1569940_at	0.869078	0.381494	1.40267	0.000420652
SGK3	serum/glucocorticoid regulated kinase family, member 3	AV690866	227627_at	1.15723	0.152686	1.69924	0.00136088
CRISPLD1	cysteine-rich secretory protein LCCL domain containing 1	AF142573	223475_at	1.79624	0.000144883	1.96601	0.000566251
ID2 /// ID2B	inhibitor of DNA binding 2, dominant negative helix-loop-helix protein /// inhibitor of DNA binding 2B, dominant negative helix-loop-helix protein (pseudogene)	AI819238	213931_at	0.87931	0.440869	1.90487	0.000567547
KCNH2	potassium voltage-gated channel, subfamily H (eag-related), member 2	NM_000238	205262_at	0.862592	0.0431818	1.58806	0.00191117
FRZB	frizzled-related protein	NM_001463	203698_s_at	0.98533	0.85975	2.02671	0.000464949
C11orf9	chromosome 11 open reading frame 9	NM_013279	204073_s_at	0.691461	0.044162	1.59853	0.00691668
ADAM33	ADAM metallopeptidase domain 33	AL356755	232570_s_at	1.16717	0.115302	1.59971	0.0024292
---	---	BF508208	243215_at	0.930128	0.377322	1.26932	0.0114993
---	---	AA706790	226579_at	1.10566	0.294378	1.50706	0.00180411
---	---	AI092511	237953_at	0.984394	0.833311	1.21478	0.0135791
FOXP1	forkhead box P1	AI417897	235444_at	0.882241	0.65242	1.67887	0.058117
C20orf103	chromosome 20 open reading frame 103	NM_012261	219463_at	0.934069	0.0992578	1.67539	0.000357866
---	---	AW138886	235279_at	1.89471	0.00157064	1.517	0.00416356
ZAP70	zeta-chain (TCR) associated protein kinase 70kDa	AI817942	214032_at	1.09106	0.236252	1.33024	0.0273444
---	---	AU144005	232797_at	1.26028	0.11881	1.28121	0.0219229
---	---	AA237039	244267_at	1.09175	0.204442	1.21088	0.043104
DCHS1	dachsous 1 (Drosophila)	BF222893	222101_s_at	0.431719	0.000142381	1.97768	0.00157976
---	---	AL050204	213929_at	0.934831	0.289707	1.26883	0.00375356
LHX2	LIM homeobox 2	U11701	211219_s_at	1.05111	0.365621	1.92267	5.96137e-06
---	---	AW183167	240622_at	1.40821	0.260667	1.24556	0.0710215
---	---	AI167430	240115_at	1.04916	0.702105	1.27471	0.116396
ACHE	acetylcholinesterase (Yt blood group)	NM_015831	205378_s_at	1.51581	0.158586	1.42376	0.178371
---	---	AI018561	243367_at	2.25482	0.0520187	1.63309	0.000230795
POSTN	periostin, osteoblast specific factor	D13665	210809_s_at	16.0688	1.38353e-06	2.02547	0.00089539
TSPAN18	CDNA PSEC0247 fis, clone NT2RP3001613, weakly similar to PLATELET-ENDOTHELIAL TETRASPAN ANTIGEN 3	AL565381	227307_at	0.410185	0.00438601	2.02398	0.00996371
VRK3	vaccinia related kinase 3	AI802331	239190_at	1.5981	0.00707418	1.42674	0.0411876
DOCK4	dedicator of cytokinesis 4	AV691156	1558691_a_at	1.14997	0.156925	1.16843	0.0784591
---	---	AI955765	240008_at	0.990745	0.938209	1.44991	0.145407
---	---	BE503070	236836_at	0.892914	0.514353	1.71196	0.00843065
TRIM36	tripartite motif-containing 36	AI028170	231123_at	0.855281	0.15451	1.31249	0.0113361
OGFOD1	CDNA FLJ54250 complete cds	N62791	241739_at	0.836435	0.0661061	1.23681	0.178426
NAIP	NLR family, apoptosis inhibitory protein	NM_004536	204861_s_at	1.0838	0.713407	1.31608	0.216432
TMEM170B	transmembrane protein 170B	BE671123	235798_at	0.663627	0.0370503	1.50414	0.00813268
IFI16	interferon, gamma-inducible protein 16	BG256677	208965_s_at	2.60335	0.179263	1.94662	0.00156093
APLP1	amyloid beta (A4) precursor-like protein 1	U48437	209462_at	1.50926	0.0267519	1.55928	0.0232091
PSTPIP2	proline-serine-threonine phosphatase interacting protein 2	NM_024430	219938_s_at	1.47738	0.0053826	1.61375	0.00190653
MN1	meningioma (disrupted in balanced translocation) 1	NM_002430	205330_at	0.53792	4.23532e-05	2.02358	0.00038057
---	---	W05495	230710_at	0.731428	0.00568824	1.40876	0.130517
40427	septin 6	D50918	212413_at	0.764162	0.0358599	1.93918	0.00323159
VSTM2L	V-set and transmembrane domain containing 2 like	AA206763	226973_at	1.32503	0.00857754	1.4667	0.0562029
SEZ6L	CDNA clone IMAGE:4815103	BE672217	231650_s_at	0.833405	0.386055	1.80475	0.000246301
ADAMTS12	ADAM metallopeptidase with thrombospondin type 1 motif, 12, mRNA (cDNA clone IMAGE:40147204)	W74476	226997_at	0.943476	0.222895	1.80236	0.000108028
DLEU2	deleted in lymphocytic leukemia 2 (non-protein coding)	H48516	1556820_a_at	0.906804	0.116402	1.26017	0.00121942
RRAS	related RAS viral (r-ras) oncogene homolog	NM_006270	212647_at	0.848785	0.0705741	1.55736	0.00808125
FIBCD1	fibrinogen C domain containing 1	BF792773	238943_at	1.08652	0.136511	1.58957	0.0494735
PPY2	pancreatic polypeptide 2	NM_021092	220654_at	1.12386	0.199091	1.26869	0.0429277
TCHP	trichoplein, keratin filament binding	BC004285	223456_s_at	1.42143	0.0168028	1.56218	0.0223955
PELO	Pelota major mRNA, complete cds; alternatively spliced	AA156873	226731_at	0.903917	0.167625	1.47123	0.00121287
MGC40574	hypothetical protein MGC40574	BC032412	1555124_at	1.10994	0.350504	1.23945	0.0888115
LOC100128443 /// MAST4	hypothetical protein LOC100128443 /// microtubule associated serine/threonine kinase family member 4	AI096389	225613_at	3.25156	0.0174019	1.54798	0.00189927
TCF12	transcription factor 12	AU146580	215611_at	0.805614	0.317543	1.32432	0.218009
EXOC6	exocyst complex component 6	AL137438	226259_at	0.683241	0.00351265	1.41496	0.0465739
NEK6	NIMA (never in mitosis gene a)-related kinase 6	BC000101	223159_s_at	3.11319	0.000153378	1.66755	0.000210265
---	---	AW771952	242434_at	1.42343	0.0341304	1.71693	0.000590631
---	---	AA733018	1561479_at	1.14203	0.123733	1.19402	0.00387978
---	---	BF724621	1557813_at	0.79334	0.135808	1.54854	0.00593408
---	---	AA745978	228742_at	1.06354	0.64575	1.5413	0.0131608
MUC1	mucin 1, cell surface associated	AF348143	211695_x_at	1.16286	0.149785	1.33253	0.0423537
---	---	N95440	233506_at	1.93208	4.10872e-06	1.71388	0.00221509
---	---	AU147017	216110_x_at	0.976719	0.7761	1.26737	0.0375061
---	---	AW104813	1557403_s_at	1.01903	0.664487	1.20107	0.0862015
NME5	non-metastatic cells 5, protein expressed in (nucleoside-diphosphate kinase)	NM_003551	206197_at	0.980966	0.754925	1.56873	0.0137183
PLXNA2	plexin A2	AI688418	213030_s_at	3.17264	0.0152869	1.75842	0.000704961
NES	nestin	AW028075	229346_at	0.735705	0.239263	1.80943	0.0145984
---	---	AI802997	235211_at	0.985162	0.702899	1.40202	0.205209
WT1	Wilms tumor 1	NM_024426	206067_s_at	1.26384	0.0773092	1.37796	0.113639
LRRC32	leucine rich repeat containing 32	NM_005512	203835_at	1.54794	0.0580719	2.02204	0.00276776
ITIH5	inter-alpha (globulin) inhibitor H5	NM_030569	219064_at	2.60973	0.000128133	1.43613	0.0203026
ABCB9	ATP-binding cassette, sub-family B (MDR/TAP), member 9	BE504895	214209_s_at	1.30345	0.00262469	2.02152	0.00484064
TGFB2	transforming growth factor, beta 2	M19154	209909_s_at	3.70285	0.0561038	1.19832	0.178084
SMPDL3A	sphingomyelin phosphodiesterase, acid-like 3A	AA873600	213624_at	1.10634	0.026031	1.50162	0.00170947
---	---	AU156189	229695_at	1.02684	0.58793	1.27551	0.0159731
GABRA1	gamma-aminobutyric acid (GABA) A receptor, alpha 1	AV722228	244118_at	1.53931	0.00136247	1.16945	0.105805
PTRF	polymerase I and transcript release factor	AL545542	1557938_s_at	4.0922	0.0121226	1.82564	0.000743175
LOC729580	PREDICTED: Homo sapiens hypothetical LOC729580 (LOC729580), mRNA	W45551	221953_s_at	0.878934	0.328289	1.74747	0.00857434
FBLN2	fibulin 2	NM_001998	203886_s_at	0.555521	0.000203257	1.80859	0.000128237
C5orf24	chromosome 5 open reading frame 24	NM_152409	1553106_at	1.29224	0.178587	1.41157	0.0214807
[truncated: 52,676 more rows]
